# Supplementary material
Source: MDPI journal article supplement (https://www.mdpi.com/1424-2818/14/12/1078)
Supplement: s1 [file s1 › Supplementary Material.pdf]

## Supplementary Material

### Figure Legends

**Figure S1.** Summary of the log transformed SVL (a) and body mass (b) values between sexes across all populations.

**Figure S2.** Distribution of the average OUT (a) and Family (b) richness across all populations.

**Figure S3.** Frequency of Occurrence (%) of plant and animal items across all populations. See Table S5 for exact percentage values.

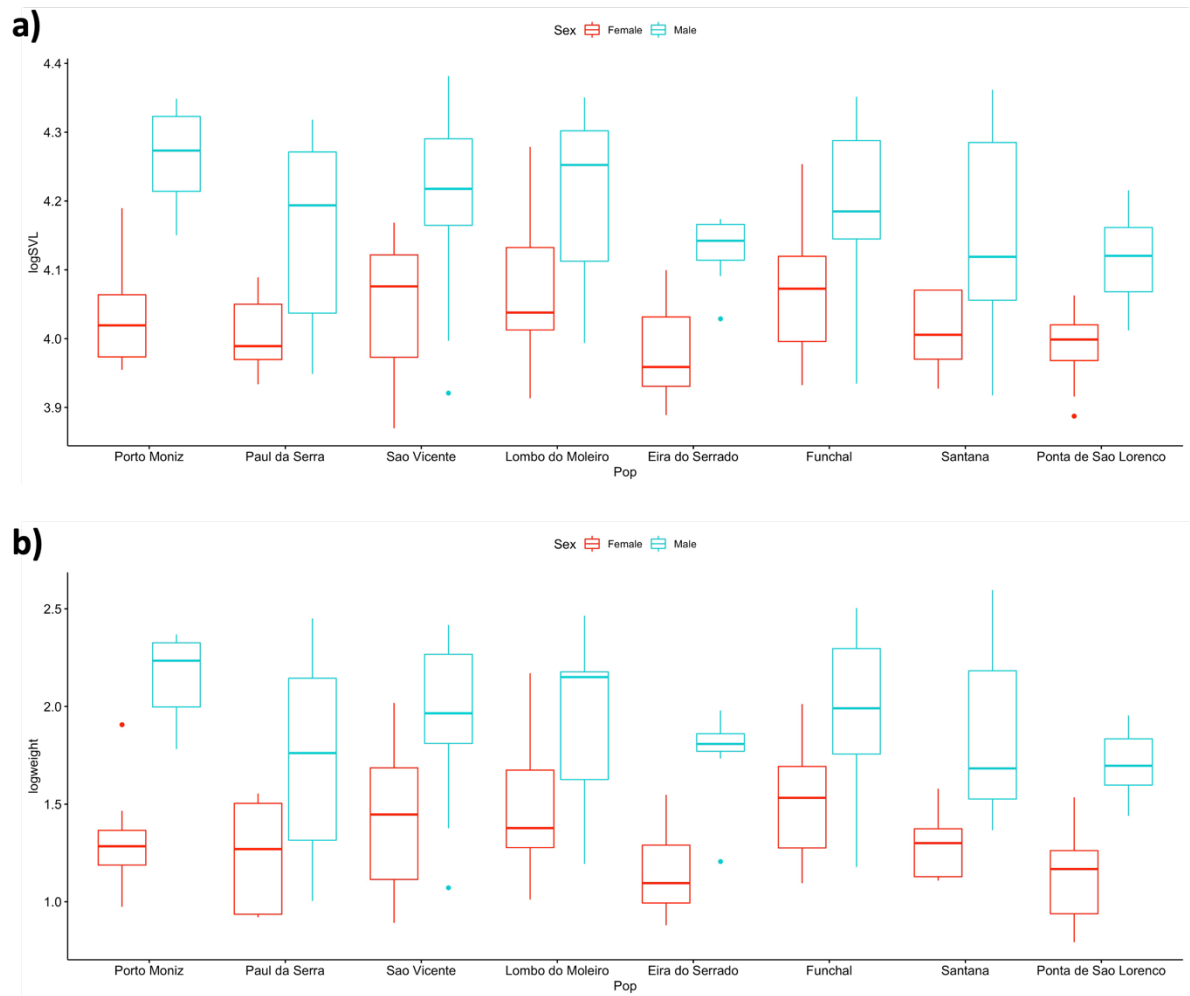

**Figure S1**

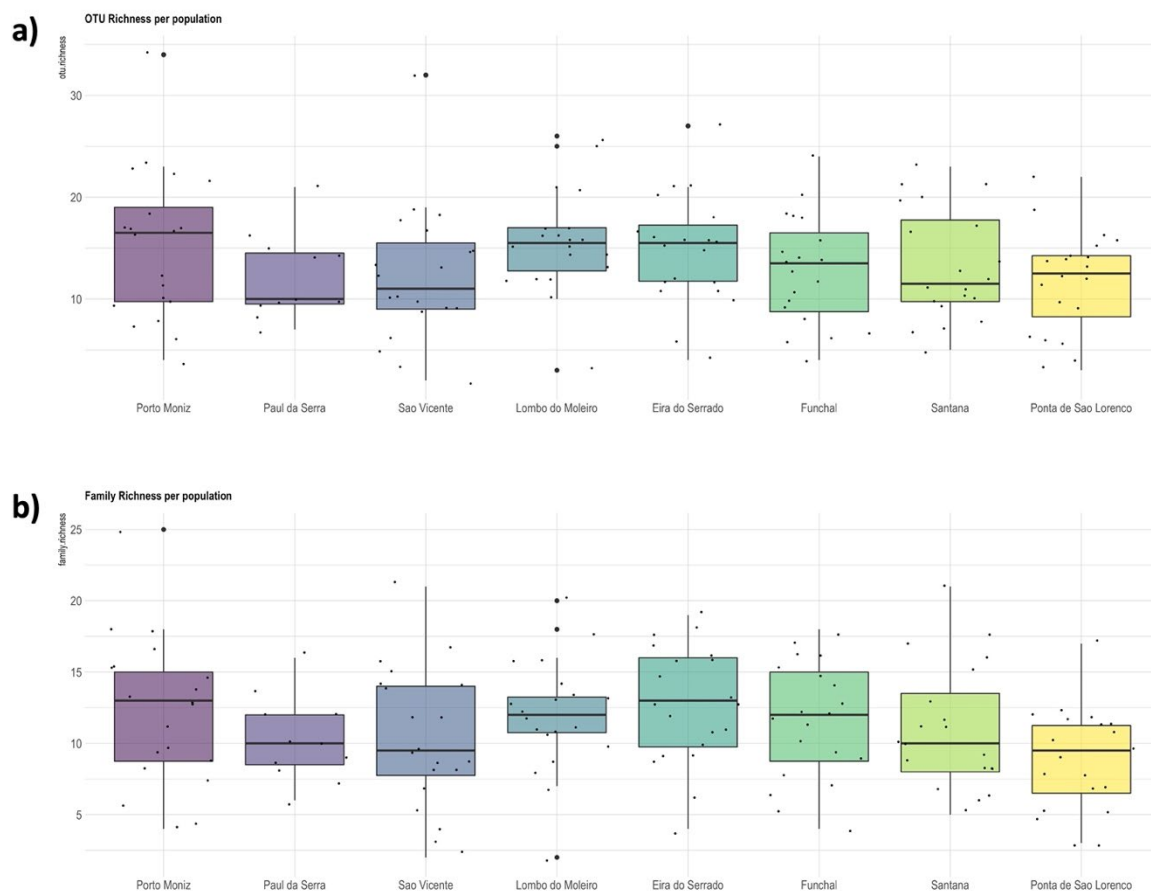

**Figure S2**

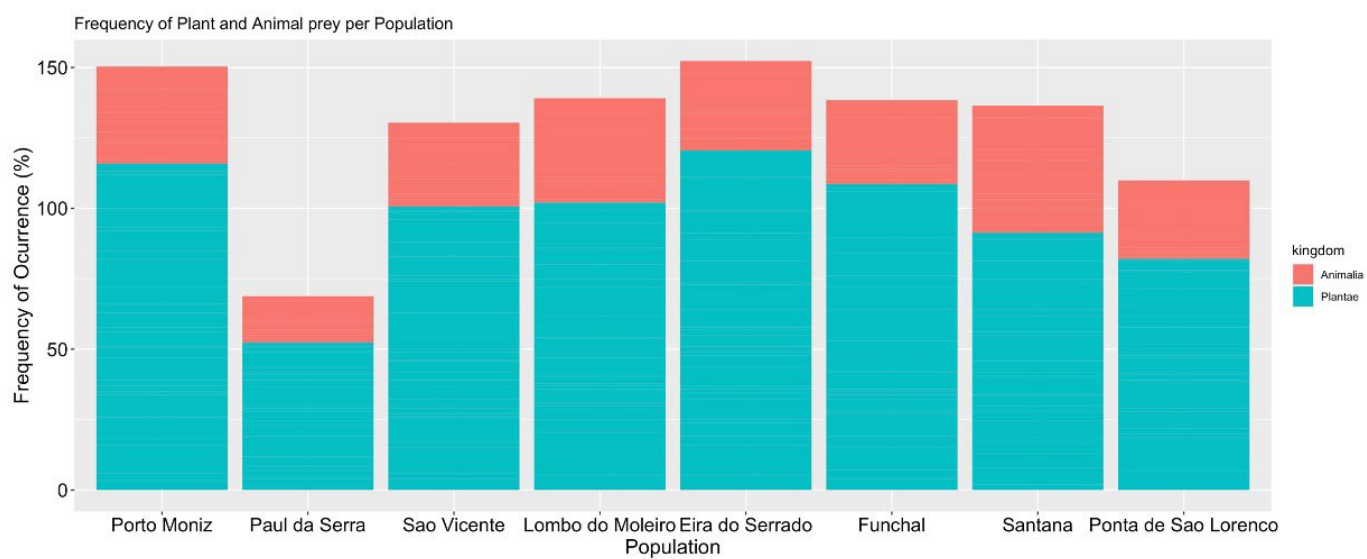

**Figure S3**
