# Supplementary material
Source: MDPI journal article supplement (https://www.mdpi.com/1424-2818/14/12/1078)
Supplement: s1 [file s1 › SupplementaryMaterial_Teira.xlsx]

## Sheet: TableS1
Table S1. Dietary data from adult Teira dugesii in Madeira.
Sample Code	Population	Sex	SVL	Weight	Kingdom	Phylum	Class	Order	Family	OTU
MAD1	Funchal	Male	63.25	7.25	Animalia	Arthropoda	Insecta	Blattodea	Blattidae	Periplaneta americana
MAD1	Funchal	Male	63.25	7.25	Animalia	Arthropoda	Insecta	Diptera	Sciaridae	Bradysia trivittata
MAD1	Funchal	Male	63.25	7.25	Animalia	Arthropoda	Malacostraca	Isopoda	Armadillidiidae	Armadillidium vulgare
MAD1	Funchal	Male	63.25	7.25	Plantae	Streptophyta	Magnoliopsida	Lamiales	Acanthaceae	Acanthaceae 1
MAD1	Funchal	Male	63.25	7.25	Plantae	Streptophyta	Magnoliopsida	Myrtales	Myrtaceae	Myrtaceae 1
MAD1	Funchal	Male	63.25	7.25	Plantae	Streptophyta	Magnoliopsida	Oxalidales	Oxalidaceae	Oxalis sp.3
MAD1	Funchal	Male	63.25	7.25	Plantae	Streptophyta	Magnoliopsida	Poales	Poaceae	Poaceae 1
MAD1	Funchal	Male	63.25	7.25	Plantae	Streptophyta	Magnoliopsida	Ranunculales	Papaveraceae	Fumaria sp.1
MAD1	Funchal	Male	63.25	7.25	Plantae	Streptophyta	Magnoliopsida	Zingiberales	Musaceae	Musa sp.1
MAD100	São Vicente	Female	51.84	2.77	Animalia	Arthropoda	Arachnida	Araneae	Salticidae	Salticidae 1
MAD100	São Vicente	Female	51.84	2.77	Animalia	Arthropoda	Insecta	Diptera	Chironomidae	Chironomidae 1
MAD100	São Vicente	Female	51.84	2.77	Animalia	Arthropoda	Insecta	Lepidoptera	Cosmopterigidae	Cosmopterix pulchrimella
MAD100	São Vicente	Female	51.84	2.77	Animalia	Arthropoda	Malacostraca	Isopoda	Armadillidiidae	Armadillidium vulgare
MAD100	São Vicente	Female	51.84	2.77	Animalia	Mollusca	Gastropoda	Stylommatophora	Agriolimacidae	Deroceras panormitanum
MAD100	São Vicente	Female	51.84	2.77	Plantae	Streptophyta	Magnoliopsida	Asterales	Asteraceae	Asteraceae 4
MAD100	São Vicente	Female	51.84	2.77	Plantae	Streptophyta	Magnoliopsida	Asterales	Asteraceae	Asteraceae 6
MAD100	São Vicente	Female	51.84	2.77	Plantae	Streptophyta	Magnoliopsida	Fabales	Fabaceae	Fabaceae 4
MAD100	São Vicente	Female	51.84	2.77	Plantae	Streptophyta	Magnoliopsida	Gentianales	Rubiaceae	Rubiaceae 1
MAD100	São Vicente	Female	51.84	2.77	Plantae	Streptophyta	Magnoliopsida	Lamiales	Plantaginaceae	Plantago sp.1
MAD100	São Vicente	Female	51.84	2.77	Plantae	Streptophyta	Magnoliopsida	Malpighiales	Euphorbiaceae	Euphorbia sp.1
MAD100	São Vicente	Female	51.84	2.77	Plantae	Streptophyta	Magnoliopsida	Oxalidales	Oxalidaceae	Oxalis sp.3
MAD100	São Vicente	Female	51.84	2.77	Plantae	Streptophyta	Magnoliopsida	Poales	Poaceae	Avena sp.1
MAD100	São Vicente	Female	51.84	2.77	Plantae	Streptophyta	Magnoliopsida	Ranunculales	Papaveraceae	Fumaria sp.1
MAD100	São Vicente	Female	51.84	2.77	Plantae	Streptophyta	Magnoliopsida	Rosales	Urticaceae	Parietaria sp.1
MAD101	São Vicente	Male	69.76	10.53	Animalia	Arthropoda	Arachnida	Trombidiformes	Tydeidae	Tydeidae 1
MAD101	São Vicente	Male	69.76	10.53	Animalia	Arthropoda	Malacostraca	Isopoda	Armadillidiidae	Armadillidium vulgare
MAD101	São Vicente	Male	69.76	10.53	Plantae	Streptophyta	Magnoliopsida	Apiales	Araliaceae	Araliaceae 2
MAD101	São Vicente	Male	69.76	10.53	Plantae	Streptophyta	Magnoliopsida	Asterales	Asteraceae	Arctotis venusta
MAD101	São Vicente	Male	69.76	10.53	Plantae	Streptophyta	Magnoliopsida	Asterales	Asteraceae	Asteraceae 4
MAD101	São Vicente	Male	69.76	10.53	Plantae	Streptophyta	Magnoliopsida	Asterales	Asteraceae	Asteraceae 8
MAD101	São Vicente	Male	69.76	10.53	Plantae	Streptophyta	Magnoliopsida	Boraginales	Boraginaceae	Boraginaceae 1
MAD101	São Vicente	Male	69.76	10.53	Plantae	Streptophyta	Magnoliopsida	Caryophyllales	Caryophyllaceae	Silene sp.1
MAD101	São Vicente	Male	69.76	10.53	Plantae	Streptophyta	Magnoliopsida	Caryophyllales	Phytolaccaceae	Phytolaccaceae 1
MAD101	São Vicente	Male	69.76	10.53	Plantae	Streptophyta	Magnoliopsida	Dipsacales	Caprifoliaceae	Abelia sp.1
MAD101	São Vicente	Male	69.76	10.53	Plantae	Streptophyta	Magnoliopsida	Ericales	Actinidiaceae	Actinidia sp.1
MAD101	São Vicente	Male	69.76	10.53	Plantae	Streptophyta	Magnoliopsida	Fagales	Betulaceae	Betulaceae 1
MAD101	São Vicente	Male	69.76	10.53	Plantae	Streptophyta	Magnoliopsida	Lamiales	Plantaginaceae	Plantago sp.1
MAD101	São Vicente	Male	69.76	10.53	Plantae	Streptophyta	Magnoliopsida	Malpighiales	Euphorbiaceae	Euphorbia sp.1
MAD101	São Vicente	Male	69.76	10.53	Plantae	Streptophyta	Magnoliopsida	Malpighiales	Euphorbiaceae	Mercurialis annua
MAD101	São Vicente	Male	69.76	10.53	Plantae	Streptophyta	Magnoliopsida	Malvales	Malvaceae	Malvaceae 1
MAD101	São Vicente	Male	69.76	10.53	Plantae	Streptophyta	Magnoliopsida	Malvales	Malvaceae	Malvaceae 2
MAD101	São Vicente	Male	69.76	10.53	Plantae	Streptophyta	Magnoliopsida	Oxalidales	Oxalidaceae	Oxalis sp.2
MAD101	São Vicente	Male	69.76	10.53	Plantae	Streptophyta	Magnoliopsida	Oxalidales	Oxalidaceae	Oxalis sp.3
MAD101	São Vicente	Male	69.76	10.53	Plantae	Streptophyta	Magnoliopsida	Poales	Poaceae	Avena sp.1
MAD101	São Vicente	Male	69.76	10.53	Plantae	Streptophyta	Magnoliopsida	Poales	Poaceae	Hordeum sp.1
MAD101	São Vicente	Male	69.76	10.53	Plantae	Streptophyta	Magnoliopsida	Poales	Poaceae	Poaceae 1
MAD101	São Vicente	Male	69.76	10.53	Plantae	Streptophyta	Magnoliopsida	Poales	Poaceae	Poaceae 3
MAD101	São Vicente	Male	69.76	10.53	Plantae	Streptophyta	Magnoliopsida	Rosales	Rosaceae	Rosaceae 1
MAD101	São Vicente	Male	69.76	10.53	Plantae	Streptophyta	Magnoliopsida	Rosales	Rosaceae	Rosaceae 2
MAD101	São Vicente	Male	69.76	10.53	Plantae	Streptophyta	Magnoliopsida	Solanales	Solanaceae	Solanum sp.1
MAD101	São Vicente	Male	69.76	10.53	Plantae	Streptophyta	Magnoliopsida	Solanales	Solanaceae	Solanum sp.2
MAD101	São Vicente	Male	69.76	10.53	Plantae	Streptophyta	Magnoliopsida	Zingiberales	Musaceae	Musa sp.1
MAD101	São Vicente	Male	69.76	10.53	Plantae	Streptophyta	Pinopsida	Pinales	Pinaceae	Picea sp.1
MAD101	São Vicente	Male	69.76	10.53	Plantae	Streptophyta	Pinopsida	Pinales	Pinaceae	Pinus sp.1
MAD101	São Vicente	Male	69.76	10.53	Plantae	Streptophyta	Polypodiopsida	Cyatheales	Cyatheaceae	Cyatheaceae 1
MAD102	São Vicente	Female	59	4.29	Animalia	Mollusca	Gastropoda	Stylommatophora	Milacidae	Milax gagates
MAD102	São Vicente	Female	59	4.29	Plantae	Streptophyta	Magnoliopsida	Asparagales	Amaryllidaceae	Nothoscordum gracile
MAD102	São Vicente	Female	59	4.29	Plantae	Streptophyta	Magnoliopsida	Asterales	Asteraceae	Asteraceae 4
MAD102	São Vicente	Female	59	4.29	Plantae	Streptophyta	Magnoliopsida	Caryophyllales	Aizoaceae	Aizoaceae 1
MAD102	São Vicente	Female	59	4.29	Plantae	Streptophyta	Magnoliopsida	Caryophyllales	Caryophyllaceae	Cerastium sp.1
MAD102	São Vicente	Female	59	4.29	Plantae	Streptophyta	Magnoliopsida	Ericales	Primulaceae	Anagalis sp.1
MAD102	São Vicente	Female	59	4.29	Plantae	Streptophyta	Magnoliopsida	Myrtales	Myrtaceae	Metrosideros sp.1
MAD102	São Vicente	Female	59	4.29	Plantae	Streptophyta	Magnoliopsida	Oxalidales	Oxalidaceae	Oxalis sp.3
MAD102	São Vicente	Female	59	4.29	Plantae	Streptophyta	Magnoliopsida	Poales	Poaceae	Poaceae 1
MAD103	São Vicente	Female	60.67	5.47	Animalia	Arthropoda	Insecta	Diptera	Sciaridae	Dolichosciara flavipes
MAD103	São Vicente	Female	60.67	5.47	Animalia	Arthropoda	Malacostraca	Isopoda	Armadillidiidae	Armadillidium vulgare
MAD103	São Vicente	Female	60.67	5.47	Animalia	Arthropoda	Malacostraca	Isopoda	Armadillidiidae	Eluma caelatum
MAD103	São Vicente	Female	60.67	5.47	Plantae	Streptophyta	Magnoliopsida	Asparagales	Asparagaceae	Asparagaceae 1
MAD103	São Vicente	Female	60.67	5.47	Plantae	Streptophyta	Magnoliopsida	Asterales	Asteraceae	Asteraceae 4
MAD103	São Vicente	Female	60.67	5.47	Plantae	Streptophyta	Magnoliopsida	Asterales	Asteraceae	Asteraceae 8
MAD103	São Vicente	Female	60.67	5.47	Plantae	Streptophyta	Magnoliopsida	Caryophyllales	Amaranthaceae	Achyranthes aspera
MAD103	São Vicente	Female	60.67	5.47	Plantae	Streptophyta	Magnoliopsida	Caryophyllales	Amaranthaceae	Achyranthes sp.1
MAD103	São Vicente	Female	60.67	5.47	Plantae	Streptophyta	Magnoliopsida	Lamiales	Plantaginaceae	Plantago sp.1
MAD103	São Vicente	Female	60.67	5.47	Plantae	Streptophyta	Magnoliopsida	Oxalidales	Oxalidaceae	Oxalis sp.2
MAD103	São Vicente	Female	60.67	5.47	Plantae	Streptophyta	Magnoliopsida	Oxalidales	Oxalidaceae	Oxalis sp.3
MAD103	São Vicente	Female	60.67	5.47	Plantae	Streptophyta	Magnoliopsida	Rosales	Rosaceae	Rosaceae 1
MAD103	São Vicente	Female	60.67	5.47	Plantae	Streptophyta	Magnoliopsida	Rosales	Urticaceae	Parietaria sp.1
MAD104	São Vicente	Male	63.93	5.97	Animalia	Arthropoda	Malacostraca	Isopoda	Armadillidiidae	Eluma caelatum
MAD104	São Vicente	Male	63.93	5.97	Animalia	Mollusca	Gastropoda	Stylommatophora	Agriolimacidae	Deroceras panormitanum
MAD104	São Vicente	Male	63.93	5.97	Animalia	Mollusca	Gastropoda	Stylommatophora	Helicidae	Helix aspersa
MAD104	São Vicente	Male	63.93	5.97	Plantae	Streptophyta	Magnoliopsida	Asterales	Asteraceae	Asteraceae 4
MAD104	São Vicente	Male	63.93	5.97	Plantae	Streptophyta	Magnoliopsida	Caryophyllales	Nyctaginaceae	Bougainvillea sp.1
MAD104	São Vicente	Male	63.93	5.97	Plantae	Streptophyta	Magnoliopsida	Ericales	Primulaceae	Anagalis sp.1
MAD104	São Vicente	Male	63.93	5.97	Plantae	Streptophyta	Magnoliopsida	Oxalidales	Oxalidaceae	Oxalis sp.2
MAD104	São Vicente	Male	63.93	5.97	Plantae	Streptophyta	Magnoliopsida	Oxalidales	Oxalidaceae	Oxalis sp.3
MAD104	São Vicente	Male	63.93	5.97	Plantae	Streptophyta	Magnoliopsida	Poales	Poaceae	Poaceae 1
MAD105	São Vicente	Male	74.04	8.52	Animalia	Arthropoda	Malacostraca	Amphipoda	Talitridae	Talitroides topitotum
MAD105	São Vicente	Male	74.04	8.52	Animalia	Mollusca	Gastropoda	Stylommatophora	Agriolimacidae	Deroceras invadens
MAD105	São Vicente	Male	74.04	8.52	Animalia	Mollusca	Gastropoda	Stylommatophora	Geomitridae	Actinella nitidiuscula
MAD105	São Vicente	Male	74.04	8.52	Plantae	Streptophyta	Magnoliopsida	Asterales	Asteraceae	Asteraceae 6
MAD105	São Vicente	Male	74.04	8.52	Plantae	Streptophyta	Magnoliopsida	Caryophyllales	Nyctaginaceae	Bougainvillea sp.1
MAD105	São Vicente	Male	74.04	8.52	Plantae	Streptophyta	Magnoliopsida	Caryophyllales	Tamaricaceae	Tamarix sp.1
MAD105	São Vicente	Male	74.04	8.52	Plantae	Streptophyta	Magnoliopsida	Oxalidales	Oxalidaceae	Oxalis sp.3
MAD105	São Vicente	Male	74.04	8.52	Plantae	Streptophyta	Magnoliopsida	Poales	Poaceae	Poaceae 1
MAD105	São Vicente	Male	74.04	8.52	Plantae	Streptophyta	Magnoliopsida	Rosales	Moraceae	Ficus sp.1
MAD106	São Vicente	Female	47.93	2.44	Plantae	Streptophyta	Magnoliopsida	Apiales	Apiaceae	Apiaceae 2
MAD106	São Vicente	Female	47.93	2.44	Plantae	Streptophyta	Magnoliopsida	Asterales	Asteraceae	Asteraceae 3
MAD106	São Vicente	Female	47.93	2.44	Plantae	Streptophyta	Magnoliopsida	Asterales	Asteraceae	Asteraceae 8
MAD106	São Vicente	Female	47.93	2.44	Plantae	Streptophyta	Magnoliopsida	Fabales	Fabaceae	Trifolium sp.1
MAD106	São Vicente	Female	47.93	2.44	Plantae	Streptophyta	Magnoliopsida	Fagales	Betulaceae	Betula sp.1
MAD106	São Vicente	Female	47.93	2.44	Plantae	Streptophyta	Magnoliopsida	Poales	Poaceae	Holcus sp.1
MAD106	São Vicente	Female	47.93	2.44	Plantae	Streptophyta	Magnoliopsida	Poales	Poaceae	Poa sp.1
MAD106	São Vicente	Female	47.93	2.44	Plantae	Streptophyta	Magnoliopsida	Poales	Poaceae	Poaceae 3
MAD106	São Vicente	Female	47.93	2.44	Plantae	Streptophyta	Magnoliopsida	Zingiberales	Musaceae	Musa sp.1
MAD106	São Vicente	Female	47.93	2.44	Plantae	Streptophyta	Pinopsida	Pinales	Pinaceae	Picea sp.1
MAD107	São Vicente	Male	65.72	7.02	Animalia	Arthropoda	Malacostraca	Isopoda	Armadillidiidae	Armadillidium vulgare
MAD107	São Vicente	Male	65.72	7.02	Plantae	Streptophyta	Magnoliopsida	Zingiberales	Musaceae	Musa sp.1
MAD108	São Vicente	Male	54.43	3.96	Animalia	Arthropoda	Malacostraca	Isopoda	Armadillidiidae	Armadillidium vulgare
MAD108	São Vicente	Male	54.43	3.96	Plantae	Streptophyta	Magnoliopsida	Asterales	Asteraceae	Asteraceae 4
MAD108	São Vicente	Male	54.43	3.96	Plantae	Streptophyta	Magnoliopsida	Fabales	Fabaceae	Trifolium sp.1
MAD108	São Vicente	Male	54.43	3.96	Plantae	Streptophyta	Magnoliopsida	Lamiales	Lamiaceae	Lamiaceae 1
MAD108	São Vicente	Male	54.43	3.96	Plantae	Streptophyta	Magnoliopsida	Poales	Poaceae	Poaceae 1
MAD109	São Vicente	Female	62	5.18	Animalia	Arthropoda	Insecta	Dermaptera	Anisolabididae	Anisolabididae 1
MAD109	São Vicente	Female	62	5.18	Animalia	Arthropoda	Insecta	Lepidoptera	Psychidae	Luffia sp.1
MAD109	São Vicente	Female	62	5.18	Animalia	Arthropoda	Malacostraca	Isopoda	Armadillidiidae	Armadillidium vulgare
MAD109	São Vicente	Female	62	5.18	Plantae	Streptophyta	Magnoliopsida	Asterales	Asteraceae	Asteraceae 4
MAD109	São Vicente	Female	62	5.18	Plantae	Streptophyta	Magnoliopsida	Asterales	Asteraceae	Asteraceae 6
MAD109	São Vicente	Female	62	5.18	Plantae	Streptophyta	Magnoliopsida	Ericales	Primulaceae	Anagalis sp.1
MAD109	São Vicente	Female	62	5.18	Plantae	Streptophyta	Magnoliopsida	Fagales	Juglandaceae	Juglandaceae 1
MAD109	São Vicente	Female	62	5.18	Plantae	Streptophyta	Magnoliopsida	Lamiales	Oleaceae	Oleaceae 1
MAD109	São Vicente	Female	62	5.18	Plantae	Streptophyta	Magnoliopsida	Lamiales	Plantaginaceae	Plantago sp.1
MAD109	São Vicente	Female	62	5.18	Plantae	Streptophyta	Magnoliopsida	Myrtales	Myrtaceae	Metrosideros sp.1
MAD109	São Vicente	Female	62	5.18	Plantae	Streptophyta	Magnoliopsida	Oxalidales	Oxalidaceae	Oxalis sp.2
MAD109	São Vicente	Female	62	5.18	Plantae	Streptophyta	Magnoliopsida	Oxalidales	Oxalidaceae	Oxalis sp.3
MAD109	São Vicente	Female	62	5.18	Plantae	Streptophyta	Magnoliopsida	Poales	Poaceae	Avena sp.1
MAD109	São Vicente	Female	62	5.18	Plantae	Streptophyta	Magnoliopsida	Poales	Poaceae	Poaceae 1
MAD109	São Vicente	Female	62	5.18	Plantae	Streptophyta	Magnoliopsida	Saxifragales	Crassulaceae	Aeonium sp.1
MAD109	São Vicente	Female	62	5.18	Plantae	Streptophyta	Magnoliopsida	Solanales	Solanaceae	Capsicum sp.1
MAD109	São Vicente	Female	62	5.18	Plantae	Streptophyta	Magnoliopsida	Zingiberales	Musaceae	Musa sp.1
MAD11	Funchal	Male	68.08	7.64	Animalia	Arthropoda	Malacostraca	Isopoda	Armadillidiidae	Armadillidium vulgare
MAD11	Funchal	Male	68.08	7.64	Animalia	Mollusca	Gastropoda	Stylommatophora	Agriolimacidae	Deroceras panormitanum
MAD11	Funchal	Male	68.08	7.64	Plantae	Streptophyta	Magnoliopsida	Apiales	Apiaceae	Apiaceae 2
MAD11	Funchal	Male	68.08	7.64	Plantae	Streptophyta	Magnoliopsida	Asterales	Asteraceae	Asteraceae 6
MAD11	Funchal	Male	68.08	7.64	Plantae	Streptophyta	Magnoliopsida	Caryophyllales	Caryophyllaceae	Cerastium sp.1
MAD11	Funchal	Male	68.08	7.64	Plantae	Streptophyta	Magnoliopsida	Caryophyllales	Nyctaginaceae	Bougainvillea sp.1
MAD11	Funchal	Male	68.08	7.64	Plantae	Streptophyta	Magnoliopsida	Lamiales	Acanthaceae	Acanthaceae 1
MAD11	Funchal	Male	68.08	7.64	Plantae	Streptophyta	Magnoliopsida	Myrtales	Myrtaceae	Myrtaceae 1
MAD11	Funchal	Male	68.08	7.64	Plantae	Streptophyta	Magnoliopsida	Oxalidales	Oxalidaceae	Oxalis sp.3
MAD11	Funchal	Male	68.08	7.64	Plantae	Streptophyta	Magnoliopsida	Sapindales	Rutaceae	Citrus sp.1
MAD11	Funchal	Male	68.08	7.64	Plantae	Streptophyta	Magnoliopsida	Sapindales	Sapindaceae	Cardiospermum grandiflorum
MAD11	Funchal	Male	68.08	7.64	Plantae	Streptophyta	Magnoliopsida	Solanales	Solanaceae	Solanum sp.2
MAD11	Funchal	Male	68.08	7.64	Plantae	Streptophyta	Magnoliopsida	Zingiberales	Musaceae	Musa sp.1
MAD113	São Vicente	Female	55.73	4.06	Animalia	Arthropoda	Chilopoda	Lithobiomorpha	Lithobiidae	Lithobius lusitanus
MAD113	São Vicente	Female	55.73	4.06	Animalia	Arthropoda	Diplopoda	Julida	Julidae	Ommatoiulus moreleti
MAD113	São Vicente	Female	55.73	4.06	Animalia	Arthropoda	Insecta	Lepidoptera	Tineidae	Oinophila v-flava
MAD113	São Vicente	Female	55.73	4.06	Animalia	Arthropoda	Malacostraca	Isopoda	Porcellionidae	Porcellio dilatatus
MAD113	São Vicente	Female	55.73	4.06	Animalia	Mollusca	Gastropoda	Stylommatophora	Geomitridae	Actinella nitidiuscula
MAD113	São Vicente	Female	55.73	4.06	Plantae	Streptophyta	Magnoliopsida	Caryophyllales	Aizoaceae	Tetragonia tetragonoides
MAD113	São Vicente	Female	55.73	4.06	Plantae	Streptophyta	Magnoliopsida	Caryophyllales	Tamaricaceae	Tamarix sp.1
MAD113	São Vicente	Female	55.73	4.06	Plantae	Streptophyta	Magnoliopsida	Fabales	Fabaceae	no match
MAD113	São Vicente	Female	55.73	4.06	Plantae	Streptophyta	Magnoliopsida	Oxalidales	Oxalidaceae	Oxalis sp.3
MAD113	São Vicente	Female	55.73	4.06	Plantae	Streptophyta	Magnoliopsida	Poales	Poaceae	Poaceae 3
MAD113	São Vicente	Female	55.73	4.06	Plantae	Streptophyta	Magnoliopsida	Proteales	Proteaceae	Proteaceae 1
MAD113	São Vicente	Female	55.73	4.06	Plantae	Streptophyta	Magnoliopsida	Zingiberales	Musaceae	Musa sp.1
MAD114	São Vicente	Male	66.04	6.58	Animalia	Arthropoda	Insecta	Hymenoptera	Formicidae	Tetramorium caldarium
MAD114	São Vicente	Male	66.04	6.58	Plantae	Streptophyta	Magnoliopsida	Apiales	Apiaceae	Apiaceae 2
MAD114	São Vicente	Male	66.04	6.58	Plantae	Streptophyta	Magnoliopsida	Asterales	Asteraceae	Asteraceae 6
MAD114	São Vicente	Male	66.04	6.58	Plantae	Streptophyta	Magnoliopsida	Brassicales	Brassicaceae	Brassica sp.1
MAD114	São Vicente	Male	66.04	6.58	Plantae	Streptophyta	Magnoliopsida	Caryophyllales	Aizoaceae	Tetragonia tetragonoides
MAD114	São Vicente	Male	66.04	6.58	Plantae	Streptophyta	Magnoliopsida	Cornales	Hydrangeaceae	Hydrangea sp.1
MAD114	São Vicente	Male	66.04	6.58	Plantae	Streptophyta	Magnoliopsida	Fabales	Fabaceae	Fabaceae 4
MAD114	São Vicente	Male	66.04	6.58	Plantae	Streptophyta	Magnoliopsida	Fagales	Myricaceae	Myricaceae 1
MAD114	São Vicente	Male	66.04	6.58	Plantae	Streptophyta	Magnoliopsida	Gentianales	Apocynaceae	Apocynaceae 1
MAD114	São Vicente	Male	66.04	6.58	Plantae	Streptophyta	Magnoliopsida	Lamiales	Oleaceae	Oleaceae 1
MAD114	São Vicente	Male	66.04	6.58	Plantae	Streptophyta	Magnoliopsida	Malpighiales	Salicaceae	Salix sp.1
MAD114	São Vicente	Male	66.04	6.58	Plantae	Streptophyta	Magnoliopsida	Poales	Poaceae	Holcus sp.1
MAD114	São Vicente	Male	66.04	6.58	Plantae	Streptophyta	Magnoliopsida	Poales	Poaceae	Poaceae 1
MAD114	São Vicente	Male	66.04	6.58	Plantae	Streptophyta	Magnoliopsida	Rosales	Rosaceae	Rosaceae 1
MAD114	São Vicente	Male	66.04	6.58	Plantae	Streptophyta	Magnoliopsida	Solanales	Solanaceae	Solanaceae 2
MAD114	São Vicente	Male	66.04	6.58	Plantae	Streptophyta	Magnoliopsida	Zingiberales	Musaceae	Musa sp.1
MAD114	São Vicente	Male	66.04	6.58	Plantae	Streptophyta	Polypodiopsida	Polypodiales	Dennstaedtiaceae	Dennstaedtiaceae 1
MAD116	São Vicente	Female	64.62	6.15	Animalia	Arthropoda	Insecta	Hemiptera	Cydnidae	Cydnidae 1
MAD116	São Vicente	Female	64.62	6.15	Animalia	Arthropoda	Insecta	Lepidoptera	Tineidae	Oinophila v-flava
MAD116	São Vicente	Female	64.62	6.15	Animalia	Arthropoda	Malacostraca	Isopoda	Porcellionidae	Porcellio dilatatus
MAD116	São Vicente	Female	64.62	6.15	Plantae	Streptophyta	Magnoliopsida	Asterales	Asteraceae	Asteraceae 5
MAD116	São Vicente	Female	64.62	6.15	Plantae	Streptophyta	Magnoliopsida	Caryophyllales	Aizoaceae	Tetragonia tetragonoides
MAD116	São Vicente	Female	64.62	6.15	Plantae	Streptophyta	Magnoliopsida	Caryophyllales	Tamaricaceae	Tamarix sp.1
MAD116	São Vicente	Female	64.62	6.15	Plantae	Streptophyta	Magnoliopsida	Dipsacales	Caprifoliaceae	Abelia sp.1
MAD116	São Vicente	Female	64.62	6.15	Plantae	Streptophyta	Magnoliopsida	Laurales	Lauraceae	Lauraceae 1
MAD116	São Vicente	Female	64.62	6.15	Plantae	Streptophyta	Magnoliopsida	Poales	Poaceae	Poaceae 3
MAD116	São Vicente	Female	64.62	6.15	Plantae	Streptophyta	Magnoliopsida	Rosales	Urticaceae	Parietaria sp.1
MAD116	São Vicente	Female	64.62	6.15	Plantae	Streptophyta	Magnoliopsida	Zingiberales	Musaceae	Musa sp.1
MAD117	São Vicente	Male	74.46	10.06	Animalia	Arthropoda	Insecta	Dermaptera	Anisolabididae	Anisolabididae 1
MAD117	São Vicente	Male	74.46	10.06	Animalia	Arthropoda	Insecta	Lepidoptera	Psychidae	Luffia sp.1
MAD117	São Vicente	Male	74.46	10.06	Animalia	Mollusca	Gastropoda	Stylommatophora	Agriolimacidae	Deroceras panormitanum
MAD117	São Vicente	Male	74.46	10.06	Plantae	Streptophyta	Magnoliopsida	Apiales	Apiaceae	Apiaceae 2
MAD117	São Vicente	Male	74.46	10.06	Plantae	Streptophyta	Magnoliopsida	Asterales	Asteraceae	Asteraceae 4
MAD117	São Vicente	Male	74.46	10.06	Plantae	Streptophyta	Magnoliopsida	Caryophyllales	Aizoaceae	Tetragonia tetragonoides
MAD117	São Vicente	Male	74.46	10.06	Plantae	Streptophyta	Magnoliopsida	Cornales	Hydrangeaceae	Hydrangea sp.1
MAD117	São Vicente	Male	74.46	10.06	Plantae	Streptophyta	Magnoliopsida	Gentianales	Rubiaceae	Rubiaceae 1
MAD117	São Vicente	Male	74.46	10.06	Plantae	Streptophyta	Magnoliopsida	Oxalidales	Oxalidaceae	Oxalis sp.2
MAD117	São Vicente	Male	74.46	10.06	Plantae	Streptophyta	Magnoliopsida	Oxalidales	Oxalidaceae	Oxalis sp.3
MAD117	São Vicente	Male	74.46	10.06	Plantae	Streptophyta	Magnoliopsida	Poales	Poaceae	Avena sp.1
MAD117	São Vicente	Male	74.46	10.06	Plantae	Streptophyta	Magnoliopsida	Ranunculales	Papaveraceae	Chelidonium majus
MAD117	São Vicente	Male	74.46	10.06	Plantae	Streptophyta	Magnoliopsida	Saxifragales	Crassulaceae	Aeonium sp.1
MAD117	São Vicente	Male	74.46	10.06	Plantae	Streptophyta	Magnoliopsida	Zingiberales	Musaceae	Musa sp.1
MAD118	São Vicente	Female	52.3	2.73	Animalia	Arthropoda	Arachnida	Sarcoptiformes	Anderemaeidae	Anderemaeidae 1
MAD118	São Vicente	Female	52.3	2.73	Animalia	Arthropoda	Malacostraca	Isopoda	Armadillidiidae	Armadillidium vulgare
MAD118	São Vicente	Female	52.3	2.73	Animalia	Arthropoda	Malacostraca	Isopoda	Armadillidiidae	Eluma caelatum
MAD118	São Vicente	Female	52.3	2.73	Plantae	Streptophyta	Magnoliopsida	Apiales	Apiaceae	Apiaceae 1
MAD118	São Vicente	Female	52.3	2.73	Plantae	Streptophyta	Magnoliopsida	Apiales	Apiaceae	Apiaceae 2
MAD118	São Vicente	Female	52.3	2.73	Plantae	Streptophyta	Magnoliopsida	Brassicales	Brassicaceae	Brassica sp.1
MAD118	São Vicente	Female	52.3	2.73	Plantae	Streptophyta	Magnoliopsida	Caryophyllales	Aizoaceae	Tetragonia tetragonoides
MAD118	São Vicente	Female	52.3	2.73	Plantae	Streptophyta	Magnoliopsida	Caryophyllales	Tamaricaceae	Tamarix sp.1
MAD118	São Vicente	Female	52.3	2.73	Plantae	Streptophyta	Magnoliopsida	Fabales	Fabaceae	Fabaceae 3
MAD118	São Vicente	Female	52.3	2.73	Plantae	Streptophyta	Magnoliopsida	Malvales	Malvaceae	Malvaceae 1
MAD118	São Vicente	Female	52.3	2.73	Plantae	Streptophyta	Magnoliopsida	Oxalidales	Oxalidaceae	Oxalis sp.2
MAD118	São Vicente	Female	52.3	2.73	Plantae	Streptophyta	Magnoliopsida	Oxalidales	Oxalidaceae	Oxalis sp.3
MAD118	São Vicente	Female	52.3	2.73	Plantae	Streptophyta	Magnoliopsida	Poales	Poaceae	Poaceae 3
MAD118	São Vicente	Female	52.3	2.73	Plantae	Streptophyta	Magnoliopsida	Rosales	Urticaceae	Parietaria sp.1
MAD118	São Vicente	Female	52.3	2.73	Plantae	Streptophyta	Magnoliopsida	Sapindales	Sapindaceae	Acer sp.1
MAD118	São Vicente	Female	52.3	2.73	Plantae	Streptophyta	Magnoliopsida	Zingiberales	Musaceae	Musa sp.1
MAD118	São Vicente	Female	52.3	2.73	Plantae	Streptophyta	Magnoliopsida	Zingiberales	Zingiberaceae	Zingiberaceae 1
MAD119	São Vicente	Male	50.44	2.92	Animalia	Arthropoda	Insecta	Lepidoptera	Tineidae	Opogona omoscopa
MAD119	São Vicente	Male	50.44	2.92	Plantae	Streptophyta	Magnoliopsida	Caryophyllales	Tamaricaceae	Tamarix sp.1
MAD119	São Vicente	Male	50.44	2.92	Plantae	Streptophyta	Magnoliopsida	Zingiberales	Musaceae	Musa sp.1
MAD12	Funchal	Female	51.03	2.99	Animalia	Arthropoda	Malacostraca	Isopoda	Porcellionidae	Agabiformius lentus
MAD12	Funchal	Female	51.03	2.99	Plantae	Streptophyta	Magnoliopsida	Apiales	Apiaceae	Apiaceae 1
MAD12	Funchal	Female	51.03	2.99	Plantae	Streptophyta	Magnoliopsida	Asterales	Asteraceae	Asteraceae 4
MAD12	Funchal	Female	51.03	2.99	Plantae	Streptophyta	Magnoliopsida	Brassicales	Brassicaceae	Brassica sp.1
MAD12	Funchal	Female	51.03	2.99	Plantae	Streptophyta	Magnoliopsida	Brassicales	Brassicaceae	Brassicaceae 1
MAD12	Funchal	Female	51.03	2.99	Plantae	Streptophyta	Magnoliopsida	Brassicales	Tropaeolaceae	Tropaeolaceae 2
MAD12	Funchal	Female	51.03	2.99	Plantae	Streptophyta	Magnoliopsida	Caryophyllales	Aizoaceae	Tetragonia tetragonoides
MAD12	Funchal	Female	51.03	2.99	Plantae	Streptophyta	Magnoliopsida	Malpighiales	Phyllanthaceae	Phyllanthaceae 1
MAD12	Funchal	Female	51.03	2.99	Plantae	Streptophyta	Magnoliopsida	Myrtales	Myrtaceae	Myrtaceae 1
MAD12	Funchal	Female	51.03	2.99	Plantae	Streptophyta	Magnoliopsida	Oxalidales	Oxalidaceae	Oxalis sp.3
MAD12	Funchal	Female	51.03	2.99	Plantae	Streptophyta	Magnoliopsida	Ranunculales	Papaveraceae	Fumaria sp.1
MAD12	Funchal	Female	51.03	2.99	Plantae	Streptophyta	Magnoliopsida	Rosales	Urticaceae	Urticaceae 1
MAD12	Funchal	Female	51.03	2.99	Plantae	Streptophyta	Magnoliopsida	Sapindales	Sapindaceae	Cardiospermum grandiflorum
MAD12	Funchal	Female	51.03	2.99	Plantae	Streptophyta	Magnoliopsida	Solanales	Convolvulaceae	Ipomoea sp.1
MAD12	Funchal	Female	51.03	2.99	Plantae	Streptophyta	Magnoliopsida	Solanales	Solanaceae	Solanum sp.2
MAD12	Funchal	Female	51.03	2.99	Plantae	Streptophyta	Magnoliopsida	Zingiberales	Musaceae	Musa sp.1
MAD12	Funchal	Female	51.03	2.99	Plantae	Streptophyta	Pinopsida	Cupressales	Cupressaceae	Cupressaceae 1
MAD12	Funchal	Female	51.03	2.99	Plantae	Streptophyta	Pinopsida	Pinales	Pinaceae	Picea sp.1
MAD120	São Vicente	Male	79.96	11.22	Plantae	Streptophyta	Magnoliopsida	Caryophyllales	Caryophyllaceae	Cerastium sp.1
MAD120	São Vicente	Male	79.96	11.22	Plantae	Streptophyta	Magnoliopsida	Oxalidales	Oxalidaceae	Oxalis sp.2
MAD120	São Vicente	Male	79.96	11.22	Plantae	Streptophyta	Magnoliopsida	Oxalidales	Oxalidaceae	Oxalis sp.3
MAD120	São Vicente	Male	79.96	11.22	Plantae	Streptophyta	Magnoliopsida	Poales	Poaceae	Poaceae 1
MAD120	São Vicente	Male	79.96	11.22	Plantae	Streptophyta	Magnoliopsida	Poales	Poaceae	Poaceae 3
MAD120	São Vicente	Male	79.96	11.22	Plantae	Streptophyta	Magnoliopsida	Rosales	Moraceae	Ficus sp.1
MAD122	Porto Moniz	Male	63.45	5.94	Animalia	Arthropoda	Diplopoda	Julida	Julidae	Ommatoiulus moreleti
MAD122	Porto Moniz	Male	63.45	5.94	Animalia	Arthropoda	Malacostraca	Isopoda	Armadillidiidae	Eluma caelatum
MAD122	Porto Moniz	Male	63.45	5.94	Animalia	Mollusca	Gastropoda	Stylommatophora	Geomitridae	Actinella nitidiuscula
MAD122	Porto Moniz	Male	63.45	5.94	Plantae	Streptophyta	Magnoliopsida	Apiales	Apiaceae	Apiaceae 2
MAD122	Porto Moniz	Male	63.45	5.94	Plantae	Streptophyta	Magnoliopsida	Asparagales	Amaryllidaceae	Allium sp.1
MAD122	Porto Moniz	Male	63.45	5.94	Plantae	Streptophyta	Magnoliopsida	Asterales	Asteraceae	Asteraceae 4
MAD122	Porto Moniz	Male	63.45	5.94	Plantae	Streptophyta	Magnoliopsida	Asterales	Asteraceae	Asteraceae 8
MAD122	Porto Moniz	Male	63.45	5.94	Plantae	Streptophyta	Magnoliopsida	Brassicales	Tropaeolaceae	Tropaeolaceae 9
MAD122	Porto Moniz	Male	63.45	5.94	Plantae	Streptophyta	Magnoliopsida	Caryophyllales	Amaranthaceae	Achyranthes aspera
MAD122	Porto Moniz	Male	63.45	5.94	Plantae	Streptophyta	Magnoliopsida	Caryophyllales	Amaranthaceae	Achyranthes sp.1
MAD122	Porto Moniz	Male	63.45	5.94	Plantae	Streptophyta	Magnoliopsida	Caryophyllales	Amaranthaceae	Amaranthaceae 1
MAD122	Porto Moniz	Male	63.45	5.94	Plantae	Streptophyta	Magnoliopsida	Caryophyllales	Chenopodiaceae	Beta sp.1
MAD122	Porto Moniz	Male	63.45	5.94	Plantae	Streptophyta	Magnoliopsida	Caryophyllales	Polygonaceae	Rumex sp.1
MAD122	Porto Moniz	Male	63.45	5.94	Plantae	Streptophyta	Magnoliopsida	Dipsacales	Caprifoliaceae	Abelia sp.1
MAD122	Porto Moniz	Male	63.45	5.94	Plantae	Streptophyta	Magnoliopsida	Ericales	Actinidiaceae	Actinidia sp.1
MAD122	Porto Moniz	Male	63.45	5.94	Plantae	Streptophyta	Magnoliopsida	Fabales	Fabaceae	Bituminaria sp.1
MAD122	Porto Moniz	Male	63.45	5.94	Plantae	Streptophyta	Magnoliopsida	Fabales	Fabaceae	Trifolium sp.1
MAD122	Porto Moniz	Male	63.45	5.94	Plantae	Streptophyta	Magnoliopsida	Gentianales	Rubiaceae	Galium sp.1
MAD122	Porto Moniz	Male	63.45	5.94	Plantae	Streptophyta	Magnoliopsida	Gentianales	Rubiaceae	Galium sp.2
MAD122	Porto Moniz	Male	63.45	5.94	Plantae	Streptophyta	Magnoliopsida	Lamiales	Plantaginaceae	Plantago sp.1
MAD122	Porto Moniz	Male	63.45	5.94	Plantae	Streptophyta	Magnoliopsida	Laurales	Lauraceae	Lauraceae 1
MAD122	Porto Moniz	Male	63.45	5.94	Plantae	Streptophyta	Magnoliopsida	Malpighiales	Salicaceae	Salix sp.1
MAD122	Porto Moniz	Male	63.45	5.94	Plantae	Streptophyta	Magnoliopsida	Malvales	Malvaceae	Malvaceae 1
MAD122	Porto Moniz	Male	63.45	5.94	Plantae	Streptophyta	Magnoliopsida	Malvales	Malvaceae	Malvaceae 2
MAD122	Porto Moniz	Male	63.45	5.94	Plantae	Streptophyta	Magnoliopsida	Oxalidales	Oxalidaceae	Oxalis sp.3
MAD122	Porto Moniz	Male	63.45	5.94	Plantae	Streptophyta	Magnoliopsida	Poales	Poaceae	Oryza sp.1
MAD122	Porto Moniz	Male	63.45	5.94	Plantae	Streptophyta	Magnoliopsida	Poales	Poaceae	Poa sp.1
MAD122	Porto Moniz	Male	63.45	5.94	Plantae	Streptophyta	Magnoliopsida	Poales	Poaceae	Poaceae 3
MAD122	Porto Moniz	Male	63.45	5.94	Plantae	Streptophyta	Magnoliopsida	Ranunculales	Papaveraceae	Fumaria sp.1
MAD122	Porto Moniz	Male	63.45	5.94	Plantae	Streptophyta	Magnoliopsida	Rosales	Rosaceae	Rosaceae 1
MAD122	Porto Moniz	Male	63.45	5.94	Plantae	Streptophyta	Magnoliopsida	Rosales	Rosaceae	Rosaceae 2
MAD122	Porto Moniz	Male	63.45	5.94	Plantae	Streptophyta	Magnoliopsida	Solanales	Convolvulaceae	Convolvulaceae 1
MAD122	Porto Moniz	Male	63.45	5.94	Plantae	Streptophyta	Magnoliopsida	Solanales	Solanaceae	Solanum sp.1
MAD122	Porto Moniz	Male	63.45	5.94	Plantae	Streptophyta	Magnoliopsida	Zingiberales	Musaceae	Musa sp.1
MAD125	Porto Moniz	Female	55.1	3.77	Animalia	Arthropoda	Malacostraca	Isopoda	Armadillidiidae	Eluma caelatum
MAD125	Porto Moniz	Female	55.1	3.77	Plantae	Streptophyta	Magnoliopsida	Asterales	Asteraceae	Asteraceae 4
MAD125	Porto Moniz	Female	55.1	3.77	Plantae	Streptophyta	Magnoliopsida	Asterales	Asteraceae	Asteraceae 8
MAD125	Porto Moniz	Female	55.1	3.77	Plantae	Streptophyta	Magnoliopsida	Brassicales	Tropaeolaceae	Tropaeolaceae 4
MAD125	Porto Moniz	Female	55.1	3.77	Plantae	Streptophyta	Magnoliopsida	Caryophyllales	Amaranthaceae	Achyranthes aspera
MAD125	Porto Moniz	Female	55.1	3.77	Plantae	Streptophyta	Magnoliopsida	Caryophyllales	Amaranthaceae	Achyranthes sp.1
MAD125	Porto Moniz	Female	55.1	3.77	Plantae	Streptophyta	Magnoliopsida	Caryophyllales	Caryophyllaceae	Cerastium sp.1
MAD125	Porto Moniz	Female	55.1	3.77	Plantae	Streptophyta	Magnoliopsida	Caryophyllales	Caryophyllaceae	Silene sp.1
MAD125	Porto Moniz	Female	55.1	3.77	Plantae	Streptophyta	Magnoliopsida	Commelinales	Commelinaceae	Tradescantia sp.1
MAD125	Porto Moniz	Female	55.1	3.77	Plantae	Streptophyta	Magnoliopsida	Dipsacales	Caprifoliaceae	Abelia sp.1
MAD125	Porto Moniz	Female	55.1	3.77	Plantae	Streptophyta	Magnoliopsida	Fabales	Fabaceae	Bituminaria sp.1
MAD125	Porto Moniz	Female	55.1	3.77	Plantae	Streptophyta	Magnoliopsida	Fabales	Fabaceae	Lotus sp.1
MAD125	Porto Moniz	Female	55.1	3.77	Plantae	Streptophyta	Magnoliopsida	Lamiales	Lamiaceae	Lamiaceae 1
MAD125	Porto Moniz	Female	55.1	3.77	Plantae	Streptophyta	Magnoliopsida	Malpighiales	Salicaceae	Salix sp.1
MAD125	Porto Moniz	Female	55.1	3.77	Plantae	Streptophyta	Magnoliopsida	Malvales	Malvaceae	Malvaceae 2
MAD125	Porto Moniz	Female	55.1	3.77	Plantae	Streptophyta	Magnoliopsida	Oxalidales	Oxalidaceae	Oxalis sp.3
MAD125	Porto Moniz	Female	55.1	3.77	Plantae	Streptophyta	Magnoliopsida	Poales	Poaceae	Poaceae 1
MAD125	Porto Moniz	Female	55.1	3.77	Plantae	Streptophyta	Magnoliopsida	Poales	Poaceae	Poaceae 3
MAD125	Porto Moniz	Female	55.1	3.77	Plantae	Streptophyta	Magnoliopsida	Ranunculales	Ranunculaceae	Ranunculus sp.1
MAD125	Porto Moniz	Female	55.1	3.77	Plantae	Streptophyta	Magnoliopsida	Rosales	Rosaceae	Prunus sp.1
MAD125	Porto Moniz	Female	55.1	3.77	Plantae	Streptophyta	Magnoliopsida	Solanales	Solanaceae	Solanum sp.1
MAD125	Porto Moniz	Female	55.1	3.77	Plantae	Streptophyta	Magnoliopsida	Zingiberales	Musaceae	Musa sp.1
MAD125	Porto Moniz	Female	55.1	3.77	Plantae	Streptophyta	Pinopsida	Pinales	Pinaceae	Pinus sp.1
MAD126	Porto Moniz	Male	76.06	10.43	Animalia	Arthropoda	Diplopoda	Julida	Julidae	Ommatoiulus moreleti
MAD126	Porto Moniz	Male	76.06	10.43	Animalia	Mollusca	Gastropoda	Stylommatophora	Geomitridae	Actinella nitidiuscula
MAD126	Porto Moniz	Male	76.06	10.43	Plantae	Streptophyta	Magnoliopsida	Asterales	Asteraceae	Asteraceae 6
MAD126	Porto Moniz	Male	76.06	10.43	Plantae	Streptophyta	Magnoliopsida	Asterales	Asteraceae	Asteraceae 8
MAD126	Porto Moniz	Male	76.06	10.43	Plantae	Streptophyta	Magnoliopsida	Brassicales	Brassicaceae	Brassicaceae 1
MAD126	Porto Moniz	Male	76.06	10.43	Plantae	Streptophyta	Magnoliopsida	Brassicales	Tropaeolaceae	Tropaeolaceae 9
MAD126	Porto Moniz	Male	76.06	10.43	Plantae	Streptophyta	Magnoliopsida	Caryophyllales	Amaranthaceae	Achyranthes aspera
MAD126	Porto Moniz	Male	76.06	10.43	Plantae	Streptophyta	Magnoliopsida	Caryophyllales	Amaranthaceae	Achyranthes sp.1
MAD126	Porto Moniz	Male	76.06	10.43	Plantae	Streptophyta	Magnoliopsida	Caryophyllales	Amaranthaceae	Amaranthaceae 1
MAD126	Porto Moniz	Male	76.06	10.43	Plantae	Streptophyta	Magnoliopsida	Caryophyllales	Polygonaceae	Rumex sp.1
MAD126	Porto Moniz	Male	76.06	10.43	Plantae	Streptophyta	Magnoliopsida	Fabales	Fabaceae	Bituminaria sp.1
MAD126	Porto Moniz	Male	76.06	10.43	Plantae	Streptophyta	Magnoliopsida	Oxalidales	Oxalidaceae	Oxalis sp.2
MAD126	Porto Moniz	Male	76.06	10.43	Plantae	Streptophyta	Magnoliopsida	Oxalidales	Oxalidaceae	Oxalis sp.3
MAD126	Porto Moniz	Male	76.06	10.43	Plantae	Streptophyta	Magnoliopsida	Proteales	Platanaceae	Platanaceae 1
MAD126	Porto Moniz	Male	76.06	10.43	Plantae	Streptophyta	Magnoliopsida	Rosales	Urticaceae	Urticaceae 1
MAD126	Porto Moniz	Male	76.06	10.43	Plantae	Streptophyta	Magnoliopsida	Solanales	Solanaceae	Solanum sp.2
MAD126	Porto Moniz	Male	76.06	10.43	Plantae	Streptophyta	Magnoliopsida	Zingiberales	Musaceae	Musa sp.1
MAD128	Porto Moniz	Female	53.09	2.65	Plantae	Streptophyta	Magnoliopsida	Asterales	Asteraceae	Asteraceae 1
MAD128	Porto Moniz	Female	53.09	2.65	Plantae	Streptophyta	Magnoliopsida	Asterales	Asteraceae	Asteraceae 4
MAD128	Porto Moniz	Female	53.09	2.65	Plantae	Streptophyta	Magnoliopsida	Asterales	Asteraceae	Asteraceae 8
MAD128	Porto Moniz	Female	53.09	2.65	Plantae	Streptophyta	Magnoliopsida	Boraginales	Boraginaceae	Boraginaceae 1
MAD128	Porto Moniz	Female	53.09	2.65	Plantae	Streptophyta	Magnoliopsida	Cornales	Hydrangeaceae	Hydrangea sp.1
MAD128	Porto Moniz	Female	53.09	2.65	Plantae	Streptophyta	Magnoliopsida	Zingiberales	Musaceae	Musa sp.1
MAD129	Porto Moniz	Male	72.28	9.67	Plantae	Streptophyta	Magnoliopsida	Asterales	Asteraceae	Asteraceae 4
MAD129	Porto Moniz	Male	72.28	9.67	Plantae	Streptophyta	Magnoliopsida	Caryophyllales	Amaranthaceae	Achyranthes aspera
MAD129	Porto Moniz	Male	72.28	9.67	Plantae	Streptophyta	Magnoliopsida	Caryophyllales	Amaranthaceae	Achyranthes sp.1
MAD129	Porto Moniz	Male	72.28	9.67	Plantae	Streptophyta	Magnoliopsida	Caryophyllales	Amaranthaceae	Amaranthaceae 1
MAD129	Porto Moniz	Male	72.28	9.67	Plantae	Streptophyta	Magnoliopsida	Fagales	Fagaceae	Quercus sp.1
MAD129	Porto Moniz	Male	72.28	9.67	Plantae	Streptophyta	Magnoliopsida	Lamiales	Plantaginaceae	Plantago sp.1
MAD129	Porto Moniz	Male	72.28	9.67	Plantae	Streptophyta	Magnoliopsida	Malpighiales	Euphorbiaceae	Euphorbia sp.1
MAD129	Porto Moniz	Male	72.28	9.67	Plantae	Streptophyta	Magnoliopsida	Malpighiales	Euphorbiaceae	Mercurialis annua
MAD129	Porto Moniz	Male	72.28	9.67	Plantae	Streptophyta	Magnoliopsida	Poales	Poaceae	Oryza sp.1
MAD129	Porto Moniz	Male	72.28	9.67	Plantae	Streptophyta	Magnoliopsida	Zingiberales	Musaceae	Musa sp.1
MAD13	Funchal	Male	74.46	10.85	Animalia	Arthropoda	Malacostraca	Isopoda	Armadillidiidae	Armadillidium vulgare
MAD13	Funchal	Male	74.46	10.85	Animalia	Arthropoda	Malacostraca	Isopoda	Porcellionidae	Porcellionides sexfasciatus
MAD13	Funchal	Male	74.46	10.85	Animalia	Mollusca	Gastropoda	Stylommatophora	Agriolimacidae	Deroceras panormitanum
MAD13	Funchal	Male	74.46	10.85	Plantae	Streptophyta	Magnoliopsida	Asparagales	Amaryllidaceae	Nothoscordum gracile
MAD13	Funchal	Male	74.46	10.85	Plantae	Streptophyta	Magnoliopsida	Asterales	Campanulaceae	Phyteuma sp.1
MAD13	Funchal	Male	74.46	10.85	Plantae	Streptophyta	Magnoliopsida	Caryophyllales	Caryophyllaceae	Cerastium sp.1
MAD13	Funchal	Male	74.46	10.85	Plantae	Streptophyta	Magnoliopsida	Malpighiales	Euphorbiaceae	Euphorbiaceae 1
MAD13	Funchal	Male	74.46	10.85	Plantae	Streptophyta	Magnoliopsida	Oxalidales	Oxalidaceae	Oxalis sp.3
MAD13	Funchal	Male	74.46	10.85	Plantae	Streptophyta	Magnoliopsida	Poales	Poaceae	Poaceae 3
MAD13	Funchal	Male	74.46	10.85	Plantae	Streptophyta	Magnoliopsida	Ranunculales	Papaveraceae	Fumaria sp.1
MAD13	Funchal	Male	74.46	10.85	Plantae	Streptophyta	Magnoliopsida	Zingiberales	Musaceae	Musa sp.1
MAD130	Porto Moniz	Female	58.04	3.85	Animalia	Arthropoda	Malacostraca	Isopoda	Armadillidiidae	Armadillidium vulgare
MAD130	Porto Moniz	Female	58.04	3.85	Plantae	Streptophyta	Magnoliopsida	Asparagales	Amaryllidaceae	Allium sp.2
MAD130	Porto Moniz	Female	58.04	3.85	Plantae	Streptophyta	Magnoliopsida	Dipsacales	Caprifoliaceae	Abelia sp.1
MAD130	Porto Moniz	Female	58.04	3.85	Plantae	Streptophyta	Magnoliopsida	Fabales	Fabaceae	Arachis sp.1
MAD130	Porto Moniz	Female	58.04	3.85	Plantae	Streptophyta	Magnoliopsida	Fabales	Fabaceae	Cicer sp.1
MAD130	Porto Moniz	Female	58.04	3.85	Plantae	Streptophyta	Magnoliopsida	Fabales	Fabaceae	Fabaceae 3
MAD130	Porto Moniz	Female	58.04	3.85	Plantae	Streptophyta	Magnoliopsida	Fagales	Fagaceae	Quercus sp.1
MAD130	Porto Moniz	Female	58.04	3.85	Plantae	Streptophyta	Magnoliopsida	Lamiales	Lamiaceae	Mentha sp.1
MAD130	Porto Moniz	Female	58.04	3.85	Plantae	Streptophyta	Magnoliopsida	Laurales	Lauraceae	Lauraceae 1
MAD130	Porto Moniz	Female	58.04	3.85	Plantae	Streptophyta	Magnoliopsida	Malpighiales	Euphorbiaceae	Euphorbiaceae 1
MAD130	Porto Moniz	Female	58.04	3.85	Plantae	Streptophyta	Magnoliopsida	Malpighiales	Salicaceae	Salix sp.1
MAD130	Porto Moniz	Female	58.04	3.85	Plantae	Streptophyta	Magnoliopsida	Malvales	Malvaceae	Gossypium sp.1
MAD130	Porto Moniz	Female	58.04	3.85	Plantae	Streptophyta	Magnoliopsida	Oxalidales	Oxalidaceae	Oxalis sp.3
MAD130	Porto Moniz	Female	58.04	3.85	Plantae	Streptophyta	Magnoliopsida	Poales	Poaceae	Oryza sp.1
MAD130	Porto Moniz	Female	58.04	3.85	Plantae	Streptophyta	Magnoliopsida	Poales	Poaceae	Poaceae 1
MAD130	Porto Moniz	Female	58.04	3.85	Plantae	Streptophyta	Magnoliopsida	Poales	Poaceae	Poaceae 3
MAD130	Porto Moniz	Female	58.04	3.85	Plantae	Streptophyta	Magnoliopsida	Rosales	Rosaceae	Rosaceae 1
MAD130	Porto Moniz	Female	58.04	3.85	Plantae	Streptophyta	Magnoliopsida	Sapindales	Meliaceae	Meliaceae 2
MAD130	Porto Moniz	Female	58.04	3.85	Plantae	Streptophyta	Magnoliopsida	Solanales	Solanaceae	Capsicum sp.1
MAD130	Porto Moniz	Female	58.04	3.85	Plantae	Streptophyta	Magnoliopsida	Solanales	Solanaceae	Solanum sp.1
MAD130	Porto Moniz	Female	58.04	3.85	Plantae	Streptophyta	Magnoliopsida	Solanales	Solanaceae	Solanum sp.2
MAD130	Porto Moniz	Female	58.04	3.85	Plantae	Streptophyta	Magnoliopsida	Zingiberales	Musaceae	Musa sp.1
MAD130	Porto Moniz	Female	58.04	3.85	Plantae	Streptophyta	Pinopsida	Pinales	Pinaceae	Pinus sp.1
MAD131	Porto Moniz	Female	66	6.73	Animalia	Arthropoda	Arachnida	Sarcoptiformes	Humerobatidae	Humerobatidae 1
MAD131	Porto Moniz	Female	66	6.73	Animalia	Arthropoda	Diplopoda	Julida	Julidae	Ommatoiulus moreleti
MAD131	Porto Moniz	Female	66	6.73	Animalia	Arthropoda	Insecta	Lepidoptera	Geometridae	Idaea atlantica
MAD131	Porto Moniz	Female	66	6.73	Animalia	Mollusca	Gastropoda	Stylommatophora	Subulinidae	Rumina decollata
MAD131	Porto Moniz	Female	66	6.73	Plantae	Streptophyta	Magnoliopsida	Lamiales	Plantaginaceae	Plantago sp.1
MAD131	Porto Moniz	Female	66	6.73	Plantae	Streptophyta	Magnoliopsida	Rosales	Rosaceae	Pyrus sp.1
MAD131	Porto Moniz	Female	66	6.73	Plantae	Streptophyta	Magnoliopsida	Rosales	Rosaceae	Rosaceae 2
MAD133	Porto Moniz	Female	52.17	2.83	Animalia	Arthropoda	Arachnida	Araneae	Salticidae	Salticidae 1
MAD133	Porto Moniz	Female	52.17	2.83	Animalia	Arthropoda	Diplopoda	Julida	Julidae	Ommatoiulus moreleti
MAD133	Porto Moniz	Female	52.17	2.83	Animalia	Arthropoda	Malacostraca	Isopoda	Armadillidiidae	Armadillidium vulgare
MAD133	Porto Moniz	Female	52.17	2.83	Plantae	Streptophyta	Magnoliopsida	Asterales	Asteraceae	Asteraceae 1
MAD133	Porto Moniz	Female	52.17	2.83	Plantae	Streptophyta	Magnoliopsida	Asterales	Asteraceae	Asteraceae 3
MAD133	Porto Moniz	Female	52.17	2.83	Plantae	Streptophyta	Magnoliopsida	Asterales	Asteraceae	Asteraceae 4
MAD133	Porto Moniz	Female	52.17	2.83	Plantae	Streptophyta	Magnoliopsida	Asterales	Asteraceae	Asteraceae 8
MAD133	Porto Moniz	Female	52.17	2.83	Plantae	Streptophyta	Magnoliopsida	Boraginales	Boraginaceae	Boraginaceae 1
MAD133	Porto Moniz	Female	52.17	2.83	Plantae	Streptophyta	Magnoliopsida	Brassicales	Brassicaceae	Brassicaceae 1
MAD133	Porto Moniz	Female	52.17	2.83	Plantae	Streptophyta	Magnoliopsida	Caryophyllales	Tamaricaceae	Tamarix sp.1
MAD133	Porto Moniz	Female	52.17	2.83	Plantae	Streptophyta	Magnoliopsida	Fabales	Fabaceae	Bituminaria sp.1
MAD133	Porto Moniz	Female	52.17	2.83	Plantae	Streptophyta	Magnoliopsida	Oxalidales	Oxalidaceae	Oxalis sp.2
MAD133	Porto Moniz	Female	52.17	2.83	Plantae	Streptophyta	Magnoliopsida	Poales	Poaceae	Poaceae 1
MAD133	Porto Moniz	Female	52.17	2.83	Plantae	Streptophyta	Magnoliopsida	Poales	Poaceae	Poaceae 3
MAD133	Porto Moniz	Female	52.17	2.83	Plantae	Streptophyta	Magnoliopsida	Solanales	Convolvulaceae	Ipomoea sp.1
MAD133	Porto Moniz	Female	52.17	2.83	Plantae	Streptophyta	Magnoliopsida	Zingiberales	Musaceae	Musa sp.1
MAD133	Porto Moniz	Female	52.17	2.83	Plantae	Streptophyta	Pinopsida	Cupressales	Cupressaceae	Cupressaceae 1
MAD137	Porto Moniz	Male	75.15	10.59	Animalia	Arthropoda	Diplopoda	Julida	Julidae	Ommatoiulus moreleti
MAD137	Porto Moniz	Male	75.15	10.59	Animalia	Arthropoda	Insecta	Hymenoptera	Formicidae	Technomyrmex pallipes
MAD137	Porto Moniz	Male	75.15	10.59	Animalia	Mollusca	Gastropoda	Stylommatophora	Geomitridae	Actinella nitidiuscula
MAD137	Porto Moniz	Male	75.15	10.59	Plantae	Streptophyta	Magnoliopsida	Apiales	Apiaceae	Apiaceae 1
MAD137	Porto Moniz	Male	75.15	10.59	Plantae	Streptophyta	Magnoliopsida	Apiales	Apiaceae	Apiaceae 2
MAD137	Porto Moniz	Male	75.15	10.59	Plantae	Streptophyta	Magnoliopsida	Asterales	Asteraceae	Asteraceae 4
MAD137	Porto Moniz	Male	75.15	10.59	Plantae	Streptophyta	Magnoliopsida	Asterales	Asteraceae	Asteraceae 6
MAD137	Porto Moniz	Male	75.15	10.59	Plantae	Streptophyta	Magnoliopsida	Asterales	Asteraceae	Asteraceae 8
MAD137	Porto Moniz	Male	75.15	10.59	Plantae	Streptophyta	Magnoliopsida	Asterales	Asteraceae	Asteraceae 9
MAD137	Porto Moniz	Male	75.15	10.59	Plantae	Streptophyta	Magnoliopsida	Brassicales	Brassicaceae	Brassica sp.1
MAD137	Porto Moniz	Male	75.15	10.59	Plantae	Streptophyta	Magnoliopsida	Caryophyllales	Amaranthaceae	Achyranthes aspera
MAD137	Porto Moniz	Male	75.15	10.59	Plantae	Streptophyta	Magnoliopsida	Caryophyllales	Amaranthaceae	Achyranthes sp.1
MAD137	Porto Moniz	Male	75.15	10.59	Plantae	Streptophyta	Magnoliopsida	Caryophyllales	Amaranthaceae	Amaranthaceae 1
MAD137	Porto Moniz	Male	75.15	10.59	Plantae	Streptophyta	Magnoliopsida	Caryophyllales	Chenopodiaceae	Beta sp.1
MAD137	Porto Moniz	Male	75.15	10.59	Plantae	Streptophyta	Magnoliopsida	Fabales	Fabaceae	Trifolium sp.1
MAD137	Porto Moniz	Male	75.15	10.59	Plantae	Streptophyta	Magnoliopsida	Fagales	Fagaceae	Fagaceae 1
MAD137	Porto Moniz	Male	75.15	10.59	Plantae	Streptophyta	Magnoliopsida	Oxalidales	Oxalidaceae	Oxalis sp.3
MAD137	Porto Moniz	Male	75.15	10.59	Plantae	Streptophyta	Magnoliopsida	Poales	Poaceae	Poaceae 1
MAD137	Porto Moniz	Male	75.15	10.59	Plantae	Streptophyta	Magnoliopsida	Poales	Poaceae	Poaceae 3
MAD137	Porto Moniz	Male	75.15	10.59	Plantae	Streptophyta	Magnoliopsida	Solanales	Solanaceae	Capsicum sp.1
MAD137	Porto Moniz	Male	75.15	10.59	Plantae	Streptophyta	Magnoliopsida	Zingiberales	Musaceae	Musa sp.1
MAD137	Porto Moniz	Male	75.15	10.59	Plantae	Streptophyta	Pinopsida	Pinales	Pinaceae	Pinus sp.1
MAD138	Porto Moniz	Female	53.4	3.34	Animalia	Arthropoda	Malacostraca	Isopoda	Armadillidiidae	Eluma caelatum
MAD138	Porto Moniz	Female	53.4	3.34	Animalia	Arthropoda	Malacostraca	Isopoda	Porcellionidae	Porcellionides sexfasciatus
MAD138	Porto Moniz	Female	53.4	3.34	Animalia	Mollusca	Gastropoda	Stylommatophora	Agriolimacidae	Deroceras invadens
MAD138	Porto Moniz	Female	53.4	3.34	Animalia	Mollusca	Gastropoda	Stylommatophora	Helicidae	Helix aspersa
MAD138	Porto Moniz	Female	53.4	3.34	Plantae	Streptophyta	Magnoliopsida	Apiales	Apiaceae	Apiaceae 2
MAD138	Porto Moniz	Female	53.4	3.34	Plantae	Streptophyta	Magnoliopsida	Brassicales	Tropaeolaceae	Tropaeolaceae 9
MAD138	Porto Moniz	Female	53.4	3.34	Plantae	Streptophyta	Magnoliopsida	Caryophyllales	Caryophyllaceae	Silene sp.1
MAD138	Porto Moniz	Female	53.4	3.34	Plantae	Streptophyta	Magnoliopsida	Oxalidales	Oxalidaceae	Oxalis sp.3
MAD138	Porto Moniz	Female	53.4	3.34	Plantae	Streptophyta	Magnoliopsida	Zingiberales	Musaceae	Musa sp.1
MAD139	Porto Moniz	Male	71.25	9.05	Animalia	Mollusca	Gastropoda	Stylommatophora	Helicidae	Helix aspersa
MAD139	Porto Moniz	Male	71.25	9.05	Plantae	Streptophyta	Magnoliopsida	Asterales	Asteraceae	Asteraceae 8
MAD139	Porto Moniz	Male	71.25	9.05	Plantae	Streptophyta	Magnoliopsida	Caryophyllales	Caryophyllaceae	Cerastium sp.1
MAD139	Porto Moniz	Male	71.25	9.05	Plantae	Streptophyta	Magnoliopsida	Caryophyllales	Chenopodiaceae	Chenopodium sp.1
MAD139	Porto Moniz	Male	71.25	9.05	Plantae	Streptophyta	Magnoliopsida	Oxalidales	Oxalidaceae	Oxalis sp.3
MAD139	Porto Moniz	Male	71.25	9.05	Plantae	Streptophyta	Magnoliopsida	Rosales	Moraceae	Ficus sp.1
MAD139	Porto Moniz	Male	71.25	9.05	Plantae	Streptophyta	Magnoliopsida	Zingiberales	Musaceae	Musa sp.1
MAD139	Porto Moniz	Male	71.25	9.05	Plantae	Streptophyta	Pinopsida	Cupressales	Cupressaceae	Cupressaceae 1
MAD14	Funchal	Male	63.76	6.07	Animalia	Arthropoda	Malacostraca	Isopoda	Armadillidiidae	Armadillidium vulgare
MAD14	Funchal	Male	63.76	6.07	Animalia	Arthropoda	Malacostraca	Isopoda	Armadillidiidae	Eluma caelatum
MAD14	Funchal	Male	63.76	6.07	Animalia	Mollusca	Gastropoda	Stylommatophora	Agriolimacidae	Deroceras panormitanum
MAD14	Funchal	Male	63.76	6.07	Plantae	Streptophyta	Magnoliopsida	Asparagales	Iridaceae	Iridaceae 1
MAD14	Funchal	Male	63.76	6.07	Plantae	Streptophyta	Magnoliopsida	Oxalidales	Oxalidaceae	Oxalis sp.3
MAD14	Funchal	Male	63.76	6.07	Plantae	Streptophyta	Magnoliopsida	Zingiberales	Musaceae	Musa sp.1
MAD141	Porto Moniz	Male	67.22	6.93	Animalia	Mollusca	Gastropoda	Stylommatophora	Geomitridae	Actinella nitidiuscula
MAD141	Porto Moniz	Male	67.22	6.93	Plantae	Streptophyta	Magnoliopsida	Brassicales	Brassicaceae	Brassicaceae 1
MAD141	Porto Moniz	Male	67.22	6.93	Plantae	Streptophyta	Magnoliopsida	Fabales	Fabaceae	Bituminaria sp.1
MAD141	Porto Moniz	Male	67.22	6.93	Plantae	Streptophyta	Magnoliopsida	Malpighiales	Euphorbiaceae	Euphorbiaceae 1
MAD144	Porto Moniz	Male	66.14	7.03	Animalia	Arthropoda	Insecta	Embioptera	Oligotomidae	Oligotoma nigra
MAD144	Porto Moniz	Male	66.14	7.03	Animalia	Arthropoda	Insecta	Lepidoptera	Tineidae	Xystrologa sp.1
MAD144	Porto Moniz	Male	66.14	7.03	Animalia	Mollusca	Gastropoda	Stylommatophora	Geomitridae	Actinella nitidiuscula
MAD144	Porto Moniz	Male	66.14	7.03	Plantae	Streptophyta	Magnoliopsida	Asterales	Asteraceae	Asteraceae 8
MAD144	Porto Moniz	Male	66.14	7.03	Plantae	Streptophyta	Magnoliopsida	Brassicales	Brassicaceae	Brassica sp.1
MAD144	Porto Moniz	Male	66.14	7.03	Plantae	Streptophyta	Magnoliopsida	Brassicales	Brassicaceae	Brassicaceae 1
MAD144	Porto Moniz	Male	66.14	7.03	Plantae	Streptophyta	Magnoliopsida	Caryophyllales	Caryophyllaceae	Cerastium sp.1
MAD144	Porto Moniz	Male	66.14	7.03	Plantae	Streptophyta	Magnoliopsida	Fabales	Fabaceae	Fabaceae 3
MAD144	Porto Moniz	Male	66.14	7.03	Plantae	Streptophyta	Magnoliopsida	Poales	Poaceae	Poaceae 1
MAD144	Porto Moniz	Male	66.14	7.03	Plantae	Streptophyta	Magnoliopsida	Poales	Poaceae	Poaceae 3
MAD144	Porto Moniz	Male	66.14	7.03	Plantae	Streptophyta	Magnoliopsida	Rosales	Moraceae	Ficus sp.1
MAD144	Porto Moniz	Male	66.14	7.03	Plantae	Streptophyta	Magnoliopsida	Zingiberales	Musaceae	Musa sp.1
MAD145	Porto Moniz	Male	68.89	8.5	Animalia	Arthropoda	Insecta	Hymenoptera	Formicidae	Technomyrmex pallipes
MAD145	Porto Moniz	Male	68.89	8.5	Animalia	Mollusca	Gastropoda	Stylommatophora	Helicidae	Helix aspersa
MAD145	Porto Moniz	Male	68.89	8.5	Animalia	Mollusca	Gastropoda	Stylommatophora	Milacidae	Milax gagates
MAD145	Porto Moniz	Male	68.89	8.5	Plantae	Streptophyta	Magnoliopsida	Apiales	Apiaceae	Apiaceae 2
MAD145	Porto Moniz	Male	68.89	8.5	Plantae	Streptophyta	Magnoliopsida	Asparagales	Amaryllidaceae	Allium sp.1
MAD145	Porto Moniz	Male	68.89	8.5	Plantae	Streptophyta	Magnoliopsida	Asparagales	Amaryllidaceae	Allium sp.2
MAD145	Porto Moniz	Male	68.89	8.5	Plantae	Streptophyta	Magnoliopsida	Asparagales	Amaryllidaceae	Nothoscordum gracile
MAD145	Porto Moniz	Male	68.89	8.5	Plantae	Streptophyta	Magnoliopsida	Asterales	Asteraceae	Asteraceae 4
MAD145	Porto Moniz	Male	68.89	8.5	Plantae	Streptophyta	Magnoliopsida	Asterales	Asteraceae	Asteraceae 8
MAD145	Porto Moniz	Male	68.89	8.5	Plantae	Streptophyta	Magnoliopsida	Brassicales	Tropaeolaceae	Tropaeolaceae 4
MAD145	Porto Moniz	Male	68.89	8.5	Plantae	Streptophyta	Magnoliopsida	Ericales	Actinidiaceae	Actinidia sp.1
MAD145	Porto Moniz	Male	68.89	8.5	Plantae	Streptophyta	Magnoliopsida	Fabales	Fabaceae	Pisum sp.1
MAD145	Porto Moniz	Male	68.89	8.5	Plantae	Streptophyta	Magnoliopsida	Fagales	Fagaceae	Fagaceae 1
MAD145	Porto Moniz	Male	68.89	8.5	Plantae	Streptophyta	Magnoliopsida	Lamiales	Lamiaceae	Lamiaceae 1
MAD145	Porto Moniz	Male	68.89	8.5	Plantae	Streptophyta	Magnoliopsida	Lamiales	Plantaginaceae	Plantago sp.1
MAD145	Porto Moniz	Male	68.89	8.5	Plantae	Streptophyta	Magnoliopsida	Poales	Poaceae	Poaceae 1
MAD145	Porto Moniz	Male	68.89	8.5	Plantae	Streptophyta	Magnoliopsida	Poales	Poaceae	Poaceae 3
MAD145	Porto Moniz	Male	68.89	8.5	Plantae	Streptophyta	Magnoliopsida	Ranunculales	Papaveraceae	Fumaria sp.1
MAD145	Porto Moniz	Male	68.89	8.5	Plantae	Streptophyta	Magnoliopsida	Rosales	Urticaceae	Urticaceae 1
MAD145	Porto Moniz	Male	68.89	8.5	Plantae	Streptophyta	Magnoliopsida	Sapindales	Rutaceae	Citrus sp.1
MAD145	Porto Moniz	Male	68.89	8.5	Plantae	Streptophyta	Magnoliopsida	Solanales	Solanaceae	Solanum sp.1
MAD145	Porto Moniz	Male	68.89	8.5	Plantae	Streptophyta	Magnoliopsida	Zingiberales	Musaceae	Musa sp.1
MAD146	Porto Moniz	Female	59.16	4.33	Animalia	Arthropoda	Arachnida	Araneae	Gnaphosidae	Zelotes tenuis
MAD146	Porto Moniz	Female	59.16	4.33	Animalia	Arthropoda	Insecta	Hemiptera	Pemphigidae	Eriosoma patchiae
MAD146	Porto Moniz	Female	59.16	4.33	Animalia	Arthropoda	Insecta	Hymenoptera	Formicidae	Technomyrmex pallipes
MAD146	Porto Moniz	Female	59.16	4.33	Animalia	Arthropoda	Insecta	Lepidoptera	Tineidae	Opogona omoscopa
MAD146	Porto Moniz	Female	59.16	4.33	Animalia	Arthropoda	Malacostraca	Isopoda	Armadillidiidae	Eluma caelatum
MAD146	Porto Moniz	Female	59.16	4.33	Animalia	Mollusca	Gastropoda	Stylommatophora	Agriolimacidae	Deroceras panormitanum
MAD146	Porto Moniz	Female	59.16	4.33	Animalia	Mollusca	Gastropoda	Stylommatophora	Geomitridae	Actinella nitidiuscula
MAD146	Porto Moniz	Female	59.16	4.33	Animalia	Mollusca	Gastropoda	Stylommatophora	Milacidae	Milax gagates
MAD146	Porto Moniz	Female	59.16	4.33	Plantae	Streptophyta	Magnoliopsida	Asterales	Asteraceae	Asteraceae 4
MAD146	Porto Moniz	Female	59.16	4.33	Plantae	Streptophyta	Magnoliopsida	Asterales	Asteraceae	Asteraceae 8
MAD146	Porto Moniz	Female	59.16	4.33	Plantae	Streptophyta	Magnoliopsida	Caryophyllales	Amaranthaceae	Achyranthes aspera
MAD146	Porto Moniz	Female	59.16	4.33	Plantae	Streptophyta	Magnoliopsida	Caryophyllales	Amaranthaceae	Achyranthes sp.1
MAD146	Porto Moniz	Female	59.16	4.33	Plantae	Streptophyta	Magnoliopsida	Malpighiales	Euphorbiaceae	Euphorbia sp.1
MAD146	Porto Moniz	Female	59.16	4.33	Plantae	Streptophyta	Magnoliopsida	Malpighiales	Euphorbiaceae	Euphorbiaceae 1
MAD146	Porto Moniz	Female	59.16	4.33	Plantae	Streptophyta	Magnoliopsida	Poales	Poaceae	Poaceae 1
MAD146	Porto Moniz	Female	59.16	4.33	Plantae	Streptophyta	Magnoliopsida	Poales	Poaceae	Poaceae 3
MAD146	Porto Moniz	Female	59.16	4.33	Plantae	Streptophyta	Magnoliopsida	Zingiberales	Musaceae	Musa sp.1
MAD147	Porto Moniz	Female	52.95	3.26	Animalia	Arthropoda	Insecta	Coleoptera	Brentidae	Malvapion malvae
MAD147	Porto Moniz	Female	52.95	3.26	Animalia	Arthropoda	Insecta	Hemiptera	Aphididae	Longicaudinus corydalisicola
MAD147	Porto Moniz	Female	52.95	3.26	Animalia	Arthropoda	Malacostraca	Isopoda	Porcellionidae	Porcellionides sexfasciatus
MAD147	Porto Moniz	Female	52.95	3.26	Animalia	Mollusca	Gastropoda	Stylommatophora	Agriolimacidae	Deroceras panormitanum
MAD147	Porto Moniz	Female	52.95	3.26	Plantae	Streptophyta	Magnoliopsida	Asterales	Asteraceae	Asteraceae 4
MAD147	Porto Moniz	Female	52.95	3.26	Plantae	Streptophyta	Magnoliopsida	Asterales	Asteraceae	Asteraceae 8
MAD147	Porto Moniz	Female	52.95	3.26	Plantae	Streptophyta	Magnoliopsida	Asterales	Asteraceae	Asteraceae 9
MAD147	Porto Moniz	Female	52.95	3.26	Plantae	Streptophyta	Magnoliopsida	Boraginales	Boraginaceae	Boraginaceae 1
MAD147	Porto Moniz	Female	52.95	3.26	Plantae	Streptophyta	Magnoliopsida	Brassicales	Brassicaceae	Brassicaceae 1
MAD147	Porto Moniz	Female	52.95	3.26	Plantae	Streptophyta	Magnoliopsida	Caryophyllales	Caryophyllaceae	Silene sp.1
MAD147	Porto Moniz	Female	52.95	3.26	Plantae	Streptophyta	Magnoliopsida	Fabales	Fabaceae	Bituminaria sp.1
MAD147	Porto Moniz	Female	52.95	3.26	Plantae	Streptophyta	Magnoliopsida	Lamiales	Lamiaceae	Lamiaceae 1
MAD147	Porto Moniz	Female	52.95	3.26	Plantae	Streptophyta	Magnoliopsida	Lamiales	Lamiaceae	Mentha sp.2
MAD147	Porto Moniz	Female	52.95	3.26	Plantae	Streptophyta	Magnoliopsida	Malvales	Malvaceae	Malvaceae 2
MAD147	Porto Moniz	Female	52.95	3.26	Plantae	Streptophyta	Magnoliopsida	Poales	Poaceae	Poaceae 3
MAD147	Porto Moniz	Female	52.95	3.26	Plantae	Streptophyta	Magnoliopsida	Zingiberales	Musaceae	Musa sp.1
MAD149	Porto Moniz	Female	58.24	3.46	Animalia	Arthropoda	Malacostraca	Isopoda	Porcellionidae	Porcellionides sexfasciatus
MAD149	Porto Moniz	Female	58.24	3.46	Plantae	Streptophyta	Magnoliopsida	Apiales	Apiaceae	Apiaceae 2
MAD149	Porto Moniz	Female	58.24	3.46	Plantae	Streptophyta	Magnoliopsida	Caryophyllales	Chenopodiaceae	Beta sp.1
MAD149	Porto Moniz	Female	58.24	3.46	Plantae	Streptophyta	Magnoliopsida	Fagales	Fagaceae	Fagaceae 1
MAD149	Porto Moniz	Female	58.24	3.46	Plantae	Streptophyta	Magnoliopsida	Poales	Poaceae	Poaceae 3
MAD149	Porto Moniz	Female	58.24	3.46	Plantae	Streptophyta	Magnoliopsida	Ranunculales	Papaveraceae	Fumaria sp.1
MAD149	Porto Moniz	Female	58.24	3.46	Plantae	Streptophyta	Magnoliopsida	Rosales	Moraceae	Ficus sp.1
MAD149	Porto Moniz	Female	58.24	3.46	Plantae	Streptophyta	Magnoliopsida	Zingiberales	Musaceae	Musa sp.1
MAD15	Funchal	Female	61.78	5.65	Animalia	Mollusca	Gastropoda	Stylommatophora	Agriolimacidae	Deroceras panormitanum
MAD15	Funchal	Female	61.78	5.65	Plantae	Streptophyta	Magnoliopsida	Asparagales	Iridaceae	Iridaceae 1
MAD15	Funchal	Female	61.78	5.65	Plantae	Streptophyta	Magnoliopsida	Asterales	Asteraceae	Asteraceae 6
MAD15	Funchal	Female	61.78	5.65	Plantae	Streptophyta	Magnoliopsida	Brassicales	Brassicaceae	Brassica sp.1
MAD15	Funchal	Female	61.78	5.65	Plantae	Streptophyta	Magnoliopsida	Caryophyllales	Caryophyllaceae	Cerastium sp.1
MAD15	Funchal	Female	61.78	5.65	Plantae	Streptophyta	Magnoliopsida	Ericales	Actinidiaceae	Actinidia sp.1
MAD15	Funchal	Female	61.78	5.65	Plantae	Streptophyta	Magnoliopsida	Fabales	Fabaceae	Arachis sp.1
MAD15	Funchal	Female	61.78	5.65	Plantae	Streptophyta	Magnoliopsida	Gentianales	Rubiaceae	Rubiaceae 1
MAD15	Funchal	Female	61.78	5.65	Plantae	Streptophyta	Magnoliopsida	Geraniales	Geraniaceae	Geranium sp.1
MAD15	Funchal	Female	61.78	5.65	Plantae	Streptophyta	Magnoliopsida	Lamiales	Acanthaceae	Acanthaceae 1
MAD15	Funchal	Female	61.78	5.65	Plantae	Streptophyta	Magnoliopsida	Oxalidales	Oxalidaceae	Oxalis sp.3
MAD15	Funchal	Female	61.78	5.65	Plantae	Streptophyta	Magnoliopsida	Poales	Poaceae	Bromus sp.1
MAD15	Funchal	Female	61.78	5.65	Plantae	Streptophyta	Magnoliopsida	Poales	Poaceae	Hordeum sp.1
MAD15	Funchal	Female	61.78	5.65	Plantae	Streptophyta	Magnoliopsida	Poales	Poaceae	Poaceae 1
MAD15	Funchal	Female	61.78	5.65	Plantae	Streptophyta	Magnoliopsida	Rosales	Rosaceae	Pyrus sp.1
MAD15	Funchal	Female	61.78	5.65	Plantae	Streptophyta	Magnoliopsida	Rosales	Urticaceae	Urticaceae 1
MAD15	Funchal	Female	61.78	5.65	Plantae	Streptophyta	Magnoliopsida	Sapindales	Rutaceae	Citrus sp.1
MAD15	Funchal	Female	61.78	5.65	Plantae	Streptophyta	Magnoliopsida	Zingiberales	Musaceae	Musa sp.1
MAD150	Porto Moniz	Male	77.37	10.69	Animalia	Arthropoda	Insecta	Hymenoptera	Formicidae	Technomyrmex pallipes
MAD150	Porto Moniz	Male	77.37	10.69	Animalia	Arthropoda	Malacostraca	Amphipoda	Talitridae	Talitroides topitotum
MAD150	Porto Moniz	Male	77.37	10.69	Animalia	Arthropoda	Malacostraca	Isopoda	Porcellionidae	Porcellionides sexfasciatus
MAD150	Porto Moniz	Male	77.37	10.69	Animalia	Mollusca	Gastropoda	Stylommatophora	Geomitridae	Actinella nitidiuscula
MAD150	Porto Moniz	Male	77.37	10.69	Plantae	Streptophyta	Magnoliopsida	Asterales	Asteraceae	Asteraceae 4
MAD150	Porto Moniz	Male	77.37	10.69	Plantae	Streptophyta	Magnoliopsida	Asterales	Asteraceae	Asteraceae 8
MAD150	Porto Moniz	Male	77.37	10.69	Plantae	Streptophyta	Magnoliopsida	Brassicales	Brassicaceae	Brassicaceae 1
MAD150	Porto Moniz	Male	77.37	10.69	Plantae	Streptophyta	Magnoliopsida	Brassicales	Tropaeolaceae	Tropaeolaceae 9
MAD150	Porto Moniz	Male	77.37	10.69	Plantae	Streptophyta	Magnoliopsida	Ericales	Primulaceae	Anagalis sp.1
MAD150	Porto Moniz	Male	77.37	10.69	Plantae	Streptophyta	Magnoliopsida	Lamiales	Plantaginaceae	Plantago sp.1
MAD150	Porto Moniz	Male	77.37	10.69	Plantae	Streptophyta	Magnoliopsida	Malpighiales	Euphorbiaceae	Euphorbiaceae 2
MAD150	Porto Moniz	Male	77.37	10.69	Plantae	Streptophyta	Magnoliopsida	Poales	Poaceae	Poaceae 1
MAD150	Porto Moniz	Male	77.37	10.69	Plantae	Streptophyta	Magnoliopsida	Poales	Poaceae	Poaceae 3
MAD150	Porto Moniz	Male	77.37	10.69	Plantae	Streptophyta	Magnoliopsida	Rosales	Moraceae	Ficus sp.1
MAD150	Porto Moniz	Male	77.37	10.69	Plantae	Streptophyta	Magnoliopsida	Rosales	Rosaceae	Pyrus sp.1
MAD150	Porto Moniz	Male	77.37	10.69	Plantae	Streptophyta	Magnoliopsida	Solanales	Solanaceae	Solanum sp.2
MAD150	Porto Moniz	Male	77.37	10.69	Plantae	Streptophyta	Magnoliopsida	Zingiberales	Musaceae	Musa sp.1
MAD151	Porto Moniz	Male	75.5	9.64	Animalia	Arthropoda	Insecta	Hemiptera	Pemphigidae	Eriosoma patchiae
MAD151	Porto Moniz	Male	75.5	9.64	Animalia	Arthropoda	Insecta	Hymenoptera	Formicidae	Paratrechina longicornis
MAD151	Porto Moniz	Male	75.5	9.64	Animalia	Arthropoda	Malacostraca	Isopoda	Armadillidiidae	Eluma caelatum
MAD151	Porto Moniz	Male	75.5	9.64	Plantae	Streptophyta	Magnoliopsida	Asparagales	Amaryllidaceae	Allium sp.2
MAD151	Porto Moniz	Male	75.5	9.64	Plantae	Streptophyta	Magnoliopsida	Asterales	Asteraceae	Asteraceae 8
MAD151	Porto Moniz	Male	75.5	9.64	Plantae	Streptophyta	Magnoliopsida	Asterales	Asteraceae	Asteraceae 9
MAD151	Porto Moniz	Male	75.5	9.64	Plantae	Streptophyta	Magnoliopsida	Boraginales	Boraginaceae	Boraginaceae 1
MAD151	Porto Moniz	Male	75.5	9.64	Plantae	Streptophyta	Magnoliopsida	Fabales	Fabaceae	Bituminaria sp.1
MAD151	Porto Moniz	Male	75.5	9.64	Plantae	Streptophyta	Magnoliopsida	Malpighiales	Euphorbiaceae	Euphorbiaceae 2
MAD151	Porto Moniz	Male	75.5	9.64	Plantae	Streptophyta	Magnoliopsida	Malvales	Malvaceae	Malvaceae 2
MAD151	Porto Moniz	Male	75.5	9.64	Plantae	Streptophyta	Magnoliopsida	Oxalidales	Oxalidaceae	Oxalis sp.3
MAD151	Porto Moniz	Male	75.5	9.64	Plantae	Streptophyta	Magnoliopsida	Poales	Poaceae	Poaceae 1
MAD151	Porto Moniz	Male	75.5	9.64	Plantae	Streptophyta	Magnoliopsida	Poales	Poaceae	Poaceae 3
MAD151	Porto Moniz	Male	75.5	9.64	Plantae	Streptophyta	Magnoliopsida	Rosales	Rosaceae	Rosaceae 1
MAD151	Porto Moniz	Male	75.5	9.64	Plantae	Streptophyta	Magnoliopsida	Solanales	Solanaceae	Solanum sp.2
MAD151	Porto Moniz	Male	75.5	9.64	Plantae	Streptophyta	Magnoliopsida	Zingiberales	Musaceae	Musa sp.1
MAD151	Porto Moniz	Male	75.5	9.64	Plantae	Streptophyta	Pinopsida	Pinales	Pinaceae	Pinus sp.1
MAD154	Porto Moniz	Female	56.23	3.94	Animalia	Arthropoda	Diplopoda	Julida	Julidae	Ommatoiulus moreleti
MAD154	Porto Moniz	Female	56.23	3.94	Animalia	Arthropoda	Insecta	Blattodea	Blattidae	Periplaneta americana
MAD154	Porto Moniz	Female	56.23	3.94	Animalia	Arthropoda	Insecta	Hemiptera	Aphididae	Hyperomyzus lactucae
MAD154	Porto Moniz	Female	56.23	3.94	Animalia	Arthropoda	Insecta	Hymenoptera	Formicidae	Technomyrmex pallipes
MAD154	Porto Moniz	Female	56.23	3.94	Animalia	Arthropoda	Insecta	Lepidoptera	Psychidae	Luffia sp.1
MAD154	Porto Moniz	Female	56.23	3.94	Animalia	Arthropoda	Malacostraca	Isopoda	Oniscidae	Oniscus asellus
MAD154	Porto Moniz	Female	56.23	3.94	Plantae	Streptophyta	Magnoliopsida	Asterales	Asteraceae	Asteraceae 4
MAD154	Porto Moniz	Female	56.23	3.94	Plantae	Streptophyta	Magnoliopsida	Fabales	Fabaceae	Fabaceae 3
MAD154	Porto Moniz	Female	56.23	3.94	Plantae	Streptophyta	Magnoliopsida	Poales	Poaceae	Brachypodium sp.1
MAD154	Porto Moniz	Female	56.23	3.94	Plantae	Streptophyta	Magnoliopsida	Vitales	Vitaceae	Vitaceae 1
MAD154	Porto Moniz	Female	56.23	3.94	Plantae	Streptophyta	Magnoliopsida	Zingiberales	Musaceae	Musa sp.1
MAD155	Lombo do Moleiro	Female	50.07	2.75	Animalia	Arthropoda	Insecta	Hymenoptera	Formicidae	Technomyrmex pallipes
MAD155	Lombo do Moleiro	Female	50.07	2.75	Animalia	Arthropoda	Malacostraca	Isopoda	Armadillidiidae	Armadillidium vulgare
MAD155	Lombo do Moleiro	Female	50.07	2.75	Animalia	Arthropoda	Malacostraca	Isopoda	Oniscidae	Oniscus asellus
MAD155	Lombo do Moleiro	Female	50.07	2.75	Animalia	Mollusca	Gastropoda	Stylommatophora	Agriolimacidae	Deroceras invadens
MAD155	Lombo do Moleiro	Female	50.07	2.75	Animalia	Mollusca	Gastropoda	Stylommatophora	Agriolimacidae	Deroceras panormitanum
MAD155	Lombo do Moleiro	Female	50.07	2.75	Animalia	Mollusca	Gastropoda	Stylommatophora	Helicidae	Helix aspersa
MAD155	Lombo do Moleiro	Female	50.07	2.75	Plantae	Streptophyta	Magnoliopsida	Asterales	Asteraceae	Asteraceae 9
MAD155	Lombo do Moleiro	Female	50.07	2.75	Plantae	Streptophyta	Magnoliopsida	Brassicales	Tropaeolaceae	Tropaeolaceae 11
MAD155	Lombo do Moleiro	Female	50.07	2.75	Plantae	Streptophyta	Magnoliopsida	Brassicales	Tropaeolaceae	Tropaeolaceae 4
MAD155	Lombo do Moleiro	Female	50.07	2.75	Plantae	Streptophyta	Magnoliopsida	Brassicales	Tropaeolaceae	Tropaeolaceae 6
MAD155	Lombo do Moleiro	Female	50.07	2.75	Plantae	Streptophyta	Magnoliopsida	Brassicales	Tropaeolaceae	Tropaeolaceae 7
MAD155	Lombo do Moleiro	Female	50.07	2.75	Plantae	Streptophyta	Magnoliopsida	Brassicales	Tropaeolaceae	Tropaeolaceae 9
MAD155	Lombo do Moleiro	Female	50.07	2.75	Plantae	Streptophyta	Magnoliopsida	Caryophyllales	Polygonaceae	Rumex sp.1
MAD155	Lombo do Moleiro	Female	50.07	2.75	Plantae	Streptophyta	Magnoliopsida	Fabales	Fabaceae	Bituminaria sp.1
MAD155	Lombo do Moleiro	Female	50.07	2.75	Plantae	Streptophyta	Magnoliopsida	Malpighiales	Salicaceae	Salix sp.1
MAD155	Lombo do Moleiro	Female	50.07	2.75	Plantae	Streptophyta	Magnoliopsida	Rosales	Rosaceae	Rosaceae 1
MAD156	Lombo do Moleiro	Male	59.8	4.44	Animalia	Arthropoda	Arachnida	Araneae	Mimetidae	Ero sp.1
MAD156	Lombo do Moleiro	Male	59.8	4.44	Animalia	Arthropoda	Insecta	Diptera	Stratiomyidae	Stratiomyidae 1
MAD156	Lombo do Moleiro	Male	59.8	4.44	Animalia	Arthropoda	Insecta	Lepidoptera	Tineidae	Opogona omoscopa
MAD156	Lombo do Moleiro	Male	59.8	4.44	Animalia	Arthropoda	Malacostraca	Isopoda	Armadillidiidae	Armadillidium vulgare
MAD156	Lombo do Moleiro	Male	59.8	4.44	Animalia	Arthropoda	Malacostraca	Isopoda	Porcellionidae	Porcellionides sexfasciatus
MAD156	Lombo do Moleiro	Male	59.8	4.44	Animalia	Mollusca	Gastropoda	Stylommatophora	Agriolimacidae	Deroceras panormitanum
MAD156	Lombo do Moleiro	Male	59.8	4.44	Plantae	Streptophyta	Magnoliopsida	Brassicales	Tropaeolaceae	Tropaeolaceae 10
MAD156	Lombo do Moleiro	Male	59.8	4.44	Plantae	Streptophyta	Magnoliopsida	Brassicales	Tropaeolaceae	Tropaeolaceae 11
MAD156	Lombo do Moleiro	Male	59.8	4.44	Plantae	Streptophyta	Magnoliopsida	Brassicales	Tropaeolaceae	Tropaeolaceae 2
MAD156	Lombo do Moleiro	Male	59.8	4.44	Plantae	Streptophyta	Magnoliopsida	Brassicales	Tropaeolaceae	Tropaeolaceae 3
MAD156	Lombo do Moleiro	Male	59.8	4.44	Plantae	Streptophyta	Magnoliopsida	Brassicales	Tropaeolaceae	Tropaeolaceae 4
MAD156	Lombo do Moleiro	Male	59.8	4.44	Plantae	Streptophyta	Magnoliopsida	Brassicales	Tropaeolaceae	Tropaeolaceae 6
MAD156	Lombo do Moleiro	Male	59.8	4.44	Plantae	Streptophyta	Magnoliopsida	Brassicales	Tropaeolaceae	Tropaeolaceae 7
MAD156	Lombo do Moleiro	Male	59.8	4.44	Plantae	Streptophyta	Magnoliopsida	Brassicales	Tropaeolaceae	Tropaeolaceae 9
MAD156	Lombo do Moleiro	Male	59.8	4.44	Plantae	Streptophyta	Magnoliopsida	Caryophyllales	Polygonaceae	Rumex sp.1
MAD156	Lombo do Moleiro	Male	59.8	4.44	Plantae	Streptophyta	Magnoliopsida	Oxalidales	Oxalidaceae	Oxalis sp.3
MAD157	Lombo do Moleiro	Female	56.52	3.61	Plantae	Streptophyta	Magnoliopsida	Asterales	Asteraceae	Asteraceae 9
MAD157	Lombo do Moleiro	Female	56.52	3.61	Plantae	Streptophyta	Magnoliopsida	Oxalidales	Oxalidaceae	Oxalis sp.2
MAD157	Lombo do Moleiro	Female	56.52	3.61	Plantae	Streptophyta	Magnoliopsida	Oxalidales	Oxalidaceae	Oxalis sp.3
MAD159	Lombo do Moleiro	Female	57.43	3.31	Animalia	Arthropoda	Diplopoda	Julida	Julidae	Ommatoiulus moreleti
MAD159	Lombo do Moleiro	Female	57.43	3.31	Animalia	Arthropoda	Malacostraca	Isopoda	Armadillidiidae	Armadillidium vulgare
MAD159	Lombo do Moleiro	Female	57.43	3.31	Animalia	Mollusca	Gastropoda	Stylommatophora	Milacidae	Milax gagates
MAD159	Lombo do Moleiro	Female	57.43	3.31	Plantae	Streptophyta	Magnoliopsida	Asparagales	Amaryllidaceae	Amaryllidaceae 1
MAD159	Lombo do Moleiro	Female	57.43	3.31	Plantae	Streptophyta	Magnoliopsida	Asterales	Asteraceae	Asteraceae 6
MAD159	Lombo do Moleiro	Female	57.43	3.31	Plantae	Streptophyta	Magnoliopsida	Fabales	Fabaceae	Bituminaria sp.1
MAD159	Lombo do Moleiro	Female	57.43	3.31	Plantae	Streptophyta	Magnoliopsida	Geraniales	Geraniaceae	Geranium sp.1
MAD159	Lombo do Moleiro	Female	57.43	3.31	Plantae	Streptophyta	Magnoliopsida	Lamiales	Plantaginaceae	Globularia sp.1
MAD159	Lombo do Moleiro	Female	57.43	3.31	Plantae	Streptophyta	Magnoliopsida	Lamiales	Plantaginaceae	Plantago sp.1
MAD159	Lombo do Moleiro	Female	57.43	3.31	Plantae	Streptophyta	Magnoliopsida	Oxalidales	Oxalidaceae	Oxalis sp.3
MAD159	Lombo do Moleiro	Female	57.43	3.31	Plantae	Streptophyta	Magnoliopsida	Poales	Poaceae	Brachypodium sp.1
MAD159	Lombo do Moleiro	Female	57.43	3.31	Plantae	Streptophyta	Magnoliopsida	Poales	Poaceae	Poaceae 1
MAD159	Lombo do Moleiro	Female	57.43	3.31	Plantae	Streptophyta	Magnoliopsida	Poales	Poaceae	Poaceae 3
MAD159	Lombo do Moleiro	Female	57.43	3.31	Plantae	Streptophyta	Magnoliopsida	Sapindales	Rutaceae	Citrus sp.1
MAD16	Funchal	Female	53.84	3.29	Animalia	Arthropoda	Malacostraca	Isopoda	Armadillidiidae	Armadillidium vulgare
MAD16	Funchal	Female	53.84	3.29	Plantae	Streptophyta	Magnoliopsida	Brassicales	Brassicaceae	Brassica sp.1
MAD16	Funchal	Female	53.84	3.29	Plantae	Streptophyta	Magnoliopsida	Caryophyllales	Nyctaginaceae	Bougainvillea sp.1
MAD16	Funchal	Female	53.84	3.29	Plantae	Streptophyta	Magnoliopsida	Fagales	Myricaceae	Myricaceae 1
MAD16	Funchal	Female	53.84	3.29	Plantae	Streptophyta	Magnoliopsida	Lamiales	Acanthaceae	Acanthaceae 1
MAD16	Funchal	Female	53.84	3.29	Plantae	Streptophyta	Magnoliopsida	Oxalidales	Oxalidaceae	Oxalis sp.3
MAD16	Funchal	Female	53.84	3.29	Plantae	Streptophyta	Magnoliopsida	Oxalidales	Oxalidaceae	Oxalis sp.4
MAD16	Funchal	Female	53.84	3.29	Plantae	Streptophyta	Magnoliopsida	Poales	Poaceae	Poaceae 1
MAD16	Funchal	Female	53.84	3.29	Plantae	Streptophyta	Magnoliopsida	Rosales	Rosaceae	Pyrus sp.1
MAD16	Funchal	Female	53.84	3.29	Plantae	Streptophyta	Magnoliopsida	Zingiberales	Musaceae	Musa sp.1
MAD160	Lombo do Moleiro	Male	65.18	8.43	Animalia	Arthropoda	Malacostraca	Isopoda	Armadillidiidae	Armadillidium vulgare
MAD160	Lombo do Moleiro	Male	65.18	8.43	Animalia	Arthropoda	Malacostraca	Isopoda	Porcellionidae	Porcellionides sexfasciatus
MAD160	Lombo do Moleiro	Male	65.18	8.43	Animalia	Mollusca	Gastropoda	Stylommatophora	Helicidae	Helix aspersa
MAD160	Lombo do Moleiro	Male	65.18	8.43	Plantae	Streptophyta	Magnoliopsida	Asparagales	Amaryllidaceae	Amaryllidaceae 1
MAD160	Lombo do Moleiro	Male	65.18	8.43	Plantae	Streptophyta	Magnoliopsida	Asterales	Asteraceae	Asteraceae 4
MAD160	Lombo do Moleiro	Male	65.18	8.43	Plantae	Streptophyta	Magnoliopsida	Asterales	Asteraceae	Asteraceae 6
MAD160	Lombo do Moleiro	Male	65.18	8.43	Plantae	Streptophyta	Magnoliopsida	Fabales	Fabaceae	Lotus sp.1
MAD160	Lombo do Moleiro	Male	65.18	8.43	Plantae	Streptophyta	Magnoliopsida	Fabales	Fabaceae	Medicago sp.1
MAD160	Lombo do Moleiro	Male	65.18	8.43	Plantae	Streptophyta	Magnoliopsida	Fabales	Fabaceae	Trifolium sp.1
MAD160	Lombo do Moleiro	Male	65.18	8.43	Plantae	Streptophyta	Magnoliopsida	Gentianales	Rubiaceae	Galium sp.2
MAD160	Lombo do Moleiro	Male	65.18	8.43	Plantae	Streptophyta	Magnoliopsida	Lamiales	Plantaginaceae	Plantago sp.1
MAD160	Lombo do Moleiro	Male	65.18	8.43	Plantae	Streptophyta	Magnoliopsida	Oxalidales	Oxalidaceae	Oxalis sp.3
MAD160	Lombo do Moleiro	Male	65.18	8.43	Plantae	Streptophyta	Magnoliopsida	Poales	Poaceae	Poaceae 2
MAD160	Lombo do Moleiro	Male	65.18	8.43	Plantae	Streptophyta	Magnoliopsida	Poales	Poaceae	Poaceae 3
MAD160	Lombo do Moleiro	Male	65.18	8.43	Plantae	Streptophyta	Magnoliopsida	Sapindales	Rutaceae	Citrus sp.1
MAD160	Lombo do Moleiro	Male	65.18	8.43	Plantae	Streptophyta	Magnoliopsida	Zingiberales	Musaceae	Musa sp.1
MAD160	Lombo do Moleiro	Male	65.18	8.43	Plantae	Streptophyta	Pinopsida	Pinales	Pinaceae	Pinus sp.1
MAD161	Lombo do Moleiro	Male	67.67	7.62	Animalia	Arthropoda	Arachnida	Opiliones	Ischyropsalididae	Ischyropsalididae 2
MAD161	Lombo do Moleiro	Male	67.67	7.62	Animalia	Arthropoda	Malacostraca	Amphipoda	Talitridae	Talitroides topitotum
MAD161	Lombo do Moleiro	Male	67.67	7.62	Animalia	Mollusca	Gastropoda	Stylommatophora	Milacidae	Milax gagates
MAD161	Lombo do Moleiro	Male	67.67	7.62	Plantae	Streptophyta	Magnoliopsida	Apiales	Apiaceae	Apiaceae 2
MAD161	Lombo do Moleiro	Male	67.67	7.62	Plantae	Streptophyta	Magnoliopsida	Asterales	Asteraceae	Asteraceae 6
MAD161	Lombo do Moleiro	Male	67.67	7.62	Plantae	Streptophyta	Magnoliopsida	Caryophyllales	Polygonaceae	Rumex sp.1
MAD161	Lombo do Moleiro	Male	67.67	7.62	Plantae	Streptophyta	Magnoliopsida	Fabales	Fabaceae	Arachis sp.1
MAD161	Lombo do Moleiro	Male	67.67	7.62	Plantae	Streptophyta	Magnoliopsida	Poales	Poaceae	Poaceae 3
MAD161	Lombo do Moleiro	Male	67.67	7.62	Plantae	Streptophyta	Magnoliopsida	Rosales	Moraceae	Ficus sp.1
MAD161	Lombo do Moleiro	Male	67.67	7.62	Plantae	Streptophyta	Magnoliopsida	Rosales	Rosaceae	Rosaceae 1
MAD161	Lombo do Moleiro	Male	67.67	7.62	Plantae	Streptophyta	Magnoliopsida	Sapindales	Simaroubaceae	Simaroubaceae 1
MAD161	Lombo do Moleiro	Male	67.67	7.62	Plantae	Streptophyta	Magnoliopsida	Solanales	Convolvulaceae	Convolvulaceae 1
MAD161	Lombo do Moleiro	Male	67.67	7.62	Plantae	Streptophyta	Pinopsida	Pinales	Pinaceae	Picea sp.1
MAD161	Lombo do Moleiro	Male	67.67	7.62	Plantae	Streptophyta	Pinopsida	Pinales	Pinaceae	Pinus sp.1
MAD162	Lombo do Moleiro	Female	56.89	4.35	Animalia	Arthropoda	Diplopoda	Julida	Julidae	Ommatoiulus moreleti
MAD162	Lombo do Moleiro	Female	56.89	4.35	Animalia	Arthropoda	Malacostraca	Isopoda	Porcellionidae	Porcellionides sexfasciatus
MAD162	Lombo do Moleiro	Female	56.89	4.35	Animalia	Mollusca	Gastropoda	Stylommatophora	Agriolimacidae	Deroceras invadens
MAD162	Lombo do Moleiro	Female	56.89	4.35	Animalia	Mollusca	Gastropoda	Stylommatophora	Agriolimacidae	Deroceras panormitanum
MAD162	Lombo do Moleiro	Female	56.89	4.35	Plantae	Streptophyta	Magnoliopsida	Apiales	Apiaceae	Apiaceae 2
MAD162	Lombo do Moleiro	Female	56.89	4.35	Plantae	Streptophyta	Magnoliopsida	Apiales	Araliaceae	Araliaceae 1
MAD162	Lombo do Moleiro	Female	56.89	4.35	Plantae	Streptophyta	Magnoliopsida	Asparagales	Amaryllidaceae	Allium sp.1
MAD162	Lombo do Moleiro	Female	56.89	4.35	Plantae	Streptophyta	Magnoliopsida	Asterales	Asteraceae	Asteraceae 4
MAD162	Lombo do Moleiro	Female	56.89	4.35	Plantae	Streptophyta	Magnoliopsida	Asterales	Asteraceae	Asteraceae 6
MAD162	Lombo do Moleiro	Female	56.89	4.35	Plantae	Streptophyta	Magnoliopsida	Asterales	Asteraceae	Asteraceae 9
MAD162	Lombo do Moleiro	Female	56.89	4.35	Plantae	Streptophyta	Magnoliopsida	Asterales	Asteraceae	Chrysanthemum sp.1
MAD162	Lombo do Moleiro	Female	56.89	4.35	Plantae	Streptophyta	Magnoliopsida	Brassicales	Tropaeolaceae	Tropaeolaceae 4
MAD162	Lombo do Moleiro	Female	56.89	4.35	Plantae	Streptophyta	Magnoliopsida	Brassicales	Tropaeolaceae	Tropaeolaceae 9
MAD162	Lombo do Moleiro	Female	56.89	4.35	Plantae	Streptophyta	Magnoliopsida	Caryophyllales	Caryophyllaceae	Cerastium sp.1
MAD162	Lombo do Moleiro	Female	56.89	4.35	Plantae	Streptophyta	Magnoliopsida	Caryophyllales	Polygonaceae	Rumex sp.1
MAD162	Lombo do Moleiro	Female	56.89	4.35	Plantae	Streptophyta	Magnoliopsida	Fagales	Myricaceae	Myricaceae 1
MAD162	Lombo do Moleiro	Female	56.89	4.35	Plantae	Streptophyta	Magnoliopsida	Geraniales	Geraniaceae	Geranium sp.1
MAD162	Lombo do Moleiro	Female	56.89	4.35	Plantae	Streptophyta	Magnoliopsida	Laurales	Lauraceae	Lauraceae 1
MAD162	Lombo do Moleiro	Female	56.89	4.35	Plantae	Streptophyta	Magnoliopsida	Malpighiales	Salicaceae	Salix sp.1
MAD162	Lombo do Moleiro	Female	56.89	4.35	Plantae	Streptophyta	Magnoliopsida	Oxalidales	Oxalidaceae	Oxalis sp.3
MAD162	Lombo do Moleiro	Female	56.89	4.35	Plantae	Streptophyta	Magnoliopsida	Poales	Poaceae	Poaceae 1
MAD162	Lombo do Moleiro	Female	56.89	4.35	Plantae	Streptophyta	Magnoliopsida	Rosales	Rosaceae	Rosaceae 1
MAD162	Lombo do Moleiro	Female	56.89	4.35	Plantae	Streptophyta	Magnoliopsida	Sapindales	Anacardiaceae	Anacardiaceae 1
MAD162	Lombo do Moleiro	Female	56.89	4.35	Plantae	Streptophyta	Magnoliopsida	Zingiberales	Musaceae	Musa sp.1
MAD163	Lombo do Moleiro	Male	54.26	3.3	Animalia	Arthropoda	Insecta	Blattodea	Blattidae	Periplaneta americana
MAD163	Lombo do Moleiro	Male	54.26	3.3	Animalia	Arthropoda	Insecta	Coleoptera	Curculionidae	Naupactus cervinus
MAD163	Lombo do Moleiro	Male	54.26	3.3	Animalia	Arthropoda	Malacostraca	Isopoda	Armadillidiidae	Armadillidium vulgare
MAD163	Lombo do Moleiro	Male	54.26	3.3	Animalia	Arthropoda	Malacostraca	Isopoda	Oniscidae	Oniscus asellus
MAD163	Lombo do Moleiro	Male	54.26	3.3	Animalia	Mollusca	Gastropoda	Stylommatophora	Agriolimacidae	Deroceras invadens
MAD163	Lombo do Moleiro	Male	54.26	3.3	Animalia	Mollusca	Gastropoda	Stylommatophora	Agriolimacidae	Deroceras panormitanum
MAD163	Lombo do Moleiro	Male	54.26	3.3	Animalia	Mollusca	Gastropoda	Stylommatophora	Helicidae	Helix aspersa
MAD163	Lombo do Moleiro	Male	54.26	3.3	Plantae	Streptophyta	Magnoliopsida	Brassicales	Tropaeolaceae	Tropaeolaceae 3
MAD163	Lombo do Moleiro	Male	54.26	3.3	Plantae	Streptophyta	Magnoliopsida	Brassicales	Tropaeolaceae	Tropaeolaceae 4
MAD163	Lombo do Moleiro	Male	54.26	3.3	Plantae	Streptophyta	Magnoliopsida	Brassicales	Tropaeolaceae	Tropaeolaceae 9
MAD163	Lombo do Moleiro	Male	54.26	3.3	Plantae	Streptophyta	Magnoliopsida	Lamiales	Lamiaceae	Mentha sp.1
MAD163	Lombo do Moleiro	Male	54.26	3.3	Plantae	Streptophyta	Magnoliopsida	Lamiales	Pedaliaceae	Pedaliaceae 1
MAD163	Lombo do Moleiro	Male	54.26	3.3	Plantae	Streptophyta	Magnoliopsida	Laurales	Lauraceae	Lauraceae 1
MAD163	Lombo do Moleiro	Male	54.26	3.3	Plantae	Streptophyta	Magnoliopsida	Poales	Poaceae	Poaceae 3
MAD163	Lombo do Moleiro	Male	54.26	3.3	Plantae	Streptophyta	Magnoliopsida	Rosales	Rosaceae	Rosaceae 1
MAD164	Lombo do Moleiro	Male	73.28	9.19	Animalia	Arthropoda	Insecta	Diptera	Sciaridae	Bradysia trivittata
MAD164	Lombo do Moleiro	Male	73.28	9.19	Animalia	Arthropoda	Insecta	Hemiptera	Aphididae	Rhopalosiphoninus latysiphon
MAD164	Lombo do Moleiro	Male	73.28	9.19	Animalia	Arthropoda	Insecta	Hymenoptera	Formicidae	Technomyrmex pallipes
MAD164	Lombo do Moleiro	Male	73.28	9.19	Animalia	Arthropoda	Malacostraca	Isopoda	Armadillidiidae	Armadillidium vulgare
MAD164	Lombo do Moleiro	Male	73.28	9.19	Animalia	Arthropoda	Malacostraca	Isopoda	Oniscidae	Oniscus asellus
MAD164	Lombo do Moleiro	Male	73.28	9.19	Animalia	Mollusca	Gastropoda	Stylommatophora	Helicidae	Helix aspersa
MAD164	Lombo do Moleiro	Male	73.28	9.19	Plantae	Streptophyta	Magnoliopsida	Apiales	Araliaceae	Araliaceae 1
MAD164	Lombo do Moleiro	Male	73.28	9.19	Plantae	Streptophyta	Magnoliopsida	Asterales	Asteraceae	Asteraceae 4
MAD164	Lombo do Moleiro	Male	73.28	9.19	Plantae	Streptophyta	Magnoliopsida	Asterales	Asteraceae	Asteraceae 8
MAD164	Lombo do Moleiro	Male	73.28	9.19	Plantae	Streptophyta	Magnoliopsida	Brassicales	Brassicaceae	Brassica sp.1
MAD164	Lombo do Moleiro	Male	73.28	9.19	Plantae	Streptophyta	Magnoliopsida	Brassicales	Tropaeolaceae	Tropaeolaceae 10
MAD164	Lombo do Moleiro	Male	73.28	9.19	Plantae	Streptophyta	Magnoliopsida	Brassicales	Tropaeolaceae	Tropaeolaceae 11
MAD164	Lombo do Moleiro	Male	73.28	9.19	Plantae	Streptophyta	Magnoliopsida	Brassicales	Tropaeolaceae	Tropaeolaceae 2
MAD164	Lombo do Moleiro	Male	73.28	9.19	Plantae	Streptophyta	Magnoliopsida	Brassicales	Tropaeolaceae	Tropaeolaceae 4
MAD164	Lombo do Moleiro	Male	73.28	9.19	Plantae	Streptophyta	Magnoliopsida	Brassicales	Tropaeolaceae	Tropaeolaceae 6
MAD164	Lombo do Moleiro	Male	73.28	9.19	Plantae	Streptophyta	Magnoliopsida	Brassicales	Tropaeolaceae	Tropaeolaceae 7
MAD164	Lombo do Moleiro	Male	73.28	9.19	Plantae	Streptophyta	Magnoliopsida	Brassicales	Tropaeolaceae	Tropaeolaceae 9
MAD164	Lombo do Moleiro	Male	73.28	9.19	Plantae	Streptophyta	Magnoliopsida	Fagales	Juglandaceae	Juglandaceae 1
MAD164	Lombo do Moleiro	Male	73.28	9.19	Plantae	Streptophyta	Magnoliopsida	Lamiales	Lamiaceae	Lamiaceae 1
MAD164	Lombo do Moleiro	Male	73.28	9.19	Plantae	Streptophyta	Magnoliopsida	Lamiales	Oleaceae	Oleaceae 1
MAD164	Lombo do Moleiro	Male	73.28	9.19	Plantae	Streptophyta	Magnoliopsida	Oxalidales	Oxalidaceae	Oxalis sp.2
MAD164	Lombo do Moleiro	Male	73.28	9.19	Plantae	Streptophyta	Magnoliopsida	Oxalidales	Oxalidaceae	Oxalis sp.3
MAD164	Lombo do Moleiro	Male	73.28	9.19	Plantae	Streptophyta	Magnoliopsida	Poales	Poaceae	Avena sp.1
MAD164	Lombo do Moleiro	Male	73.28	9.19	Plantae	Streptophyta	Magnoliopsida	Rosales	Rosaceae	Rosaceae 1
MAD164	Lombo do Moleiro	Male	73.28	9.19	Plantae	Streptophyta	Magnoliopsida	Rosales	Urticaceae	Parietaria sp.1
MAD164	Lombo do Moleiro	Male	73.28	9.19	Plantae	Streptophyta	Magnoliopsida	Zingiberales	Musaceae	Musa sp.1
MAD165	Lombo do Moleiro	Female	64.05	5.71	Animalia	Arthropoda	Diplopoda	Julida	Julidae	Ommatoiulus moreleti
MAD165	Lombo do Moleiro	Female	64.05	5.71	Animalia	Arthropoda	Insecta	Lepidoptera	Tineidae	Opogona omoscopa
MAD165	Lombo do Moleiro	Female	64.05	5.71	Animalia	Arthropoda	Malacostraca	Isopoda	Oniscidae	Oniscus asellus
MAD165	Lombo do Moleiro	Female	64.05	5.71	Animalia	Arthropoda	Malacostraca	Isopoda	Porcellionidae	Porcellionides pruinosus
MAD165	Lombo do Moleiro	Female	64.05	5.71	Plantae	Streptophyta	Magnoliopsida	Apiales	Apiaceae	Apiaceae 2
MAD165	Lombo do Moleiro	Female	64.05	5.71	Plantae	Streptophyta	Magnoliopsida	Apiales	Araliaceae	Araliaceae 1
MAD165	Lombo do Moleiro	Female	64.05	5.71	Plantae	Streptophyta	Magnoliopsida	Asterales	Asteraceae	Asteraceae 8
MAD165	Lombo do Moleiro	Female	64.05	5.71	Plantae	Streptophyta	Magnoliopsida	Asterales	Asteraceae	Asteraceae 9
MAD165	Lombo do Moleiro	Female	64.05	5.71	Plantae	Streptophyta	Magnoliopsida	Malpighiales	Salicaceae	Salix sp.1
MAD165	Lombo do Moleiro	Female	64.05	5.71	Plantae	Streptophyta	Magnoliopsida	Oxalidales	Oxalidaceae	Oxalis sp.3
MAD165	Lombo do Moleiro	Female	64.05	5.71	Plantae	Streptophyta	Magnoliopsida	Ranunculales	Papaveraceae	Fumaria sp.1
MAD165	Lombo do Moleiro	Female	64.05	5.71	Plantae	Streptophyta	Magnoliopsida	Solanales	Solanaceae	Solanum sp.1
MAD167	Lombo do Moleiro	Male	58.15	4.21	Animalia	Arthropoda	Malacostraca	Isopoda	Armadillidiidae	Armadillidium vulgare
MAD167	Lombo do Moleiro	Male	58.15	4.21	Animalia	Arthropoda	Malacostraca	Isopoda	Armadillidiidae	Eluma caelatum
MAD167	Lombo do Moleiro	Male	58.15	4.21	Plantae	Streptophyta	Magnoliopsida	Apiales	Apiaceae	Apiaceae 2
MAD167	Lombo do Moleiro	Male	58.15	4.21	Plantae	Streptophyta	Magnoliopsida	Asterales	Asteraceae	Asteraceae 9
MAD167	Lombo do Moleiro	Male	58.15	4.21	Plantae	Streptophyta	Magnoliopsida	Caryophyllales	Caryophyllaceae	Cerastium sp.1
MAD167	Lombo do Moleiro	Male	58.15	4.21	Plantae	Streptophyta	Magnoliopsida	Lamiales	Lamiaceae	Lamiaceae 1
MAD167	Lombo do Moleiro	Male	58.15	4.21	Plantae	Streptophyta	Magnoliopsida	Malpighiales	Salicaceae	Salix sp.1
MAD167	Lombo do Moleiro	Male	58.15	4.21	Plantae	Streptophyta	Magnoliopsida	Oxalidales	Oxalidaceae	Oxalis sp.3
MAD167	Lombo do Moleiro	Male	58.15	4.21	Plantae	Streptophyta	Magnoliopsida	Poales	Poaceae	Poaceae 1
MAD167	Lombo do Moleiro	Male	58.15	4.21	Plantae	Streptophyta	Magnoliopsida	Rosales	Rhamnaceae	Rhamnus sp.1
MAD167	Lombo do Moleiro	Male	58.15	4.21	Plantae	Streptophyta	Magnoliopsida	Rosales	Rosaceae	Rosaceae 1
MAD167	Lombo do Moleiro	Male	58.15	4.21	Plantae	Streptophyta	Magnoliopsida	Sapindales	Anacardiaceae	Anacardiaceae 1
MAD167	Lombo do Moleiro	Male	58.15	4.21	Plantae	Streptophyta	Magnoliopsida	Zingiberales	Musaceae	Musa sp.1
MAD168	Lombo do Moleiro	Male	77.53	11.76	Animalia	Mollusca	Gastropoda	Stylommatophora	Agriolimacidae	Deroceras panormitanum
MAD168	Lombo do Moleiro	Male	77.53	11.76	Plantae	Streptophyta	Magnoliopsida	Apiales	Apiaceae	Apiaceae 2
MAD168	Lombo do Moleiro	Male	77.53	11.76	Plantae	Streptophyta	Magnoliopsida	Asparagales	Amaryllidaceae	Allium sp.1
MAD168	Lombo do Moleiro	Male	77.53	11.76	Plantae	Streptophyta	Magnoliopsida	Asterales	Asteraceae	Asteraceae 4
MAD168	Lombo do Moleiro	Male	77.53	11.76	Plantae	Streptophyta	Magnoliopsida	Asterales	Asteraceae	Asteraceae 9
MAD168	Lombo do Moleiro	Male	77.53	11.76	Plantae	Streptophyta	Magnoliopsida	Oxalidales	Oxalidaceae	Oxalis sp.2
MAD168	Lombo do Moleiro	Male	77.53	11.76	Plantae	Streptophyta	Magnoliopsida	Oxalidales	Oxalidaceae	Oxalis sp.3
MAD168	Lombo do Moleiro	Male	77.53	11.76	Plantae	Streptophyta	Magnoliopsida	Poales	Poaceae	Avena sp.1
MAD168	Lombo do Moleiro	Male	77.53	11.76	Plantae	Streptophyta	Magnoliopsida	Poales	Poaceae	Poaceae 1
MAD168	Lombo do Moleiro	Male	77.53	11.76	Plantae	Streptophyta	Magnoliopsida	Ranunculales	Papaveraceae	Chelidonium majus
MAD17	Funchal	Female	60.8	4.84	Animalia	Arthropoda	Diplopoda	Julida	Julidae	Ommatoiulus moreleti
MAD17	Funchal	Female	60.8	4.84	Animalia	Arthropoda	Insecta	Hymenoptera	Formicidae	Technomyrmex pallipes
MAD17	Funchal	Female	60.8	4.84	Animalia	Arthropoda	Malacostraca	Isopoda	Armadillidiidae	Armadillidium vulgare
MAD17	Funchal	Female	60.8	4.84	Animalia	Arthropoda	Malacostraca	Isopoda	Porcellionidae	Porcellionides sexfasciatus
MAD17	Funchal	Female	60.8	4.84	Plantae	Streptophyta	Magnoliopsida	Apiales	Apiaceae	Apiaceae 2
MAD17	Funchal	Female	60.8	4.84	Plantae	Streptophyta	Magnoliopsida	Asterales	Asteraceae	Asteraceae 8
MAD17	Funchal	Female	60.8	4.84	Plantae	Streptophyta	Magnoliopsida	Fabales	Fabaceae	Fabaceae 3
MAD17	Funchal	Female	60.8	4.84	Plantae	Streptophyta	Magnoliopsida	Lamiales	Acanthaceae	Acanthaceae 1
MAD17	Funchal	Female	60.8	4.84	Plantae	Streptophyta	Magnoliopsida	Lamiales	Bignoniaceae	Bignoniaceae 1
MAD17	Funchal	Female	60.8	4.84	Plantae	Streptophyta	Magnoliopsida	Malpighiales	Salicaceae	Populus sp.1
MAD17	Funchal	Female	60.8	4.84	Plantae	Streptophyta	Magnoliopsida	Oxalidales	Oxalidaceae	Oxalis sp.3
MAD17	Funchal	Female	60.8	4.84	Plantae	Streptophyta	Magnoliopsida	Poales	Poaceae	Poaceae 1
MAD17	Funchal	Female	60.8	4.84	Plantae	Streptophyta	Magnoliopsida	Poales	Poaceae	Poaceae 3
MAD17	Funchal	Female	60.8	4.84	Plantae	Streptophyta	Magnoliopsida	Rosales	Rosaceae	Rosaceae 1
MAD17	Funchal	Female	60.8	4.84	Plantae	Streptophyta	Magnoliopsida	Rosales	Urticaceae	Urticaceae 1
MAD17	Funchal	Female	60.8	4.84	Plantae	Streptophyta	Magnoliopsida	Solanales	Solanaceae	Solanum sp.1
MAD17	Funchal	Female	60.8	4.84	Plantae	Streptophyta	Magnoliopsida	Solanales	Solanaceae	Solanum sp.2
MAD17	Funchal	Female	60.8	4.84	Plantae	Streptophyta	Magnoliopsida	Zingiberales	Musaceae	Musa sp.1
MAD170	Lombo do Moleiro	Male	72.98	8.77	Animalia	Arthropoda	Malacostraca	Isopoda	Armadillidiidae	Armadillidium vulgare
MAD170	Lombo do Moleiro	Male	72.98	8.77	Plantae	Streptophyta	Magnoliopsida	Apiales	Apiaceae	Apiaceae 2
MAD170	Lombo do Moleiro	Male	72.98	8.77	Plantae	Streptophyta	Magnoliopsida	Apiales	Araliaceae	Araliaceae 1
MAD170	Lombo do Moleiro	Male	72.98	8.77	Plantae	Streptophyta	Magnoliopsida	Asterales	Asteraceae	Asteraceae 4
MAD170	Lombo do Moleiro	Male	72.98	8.77	Plantae	Streptophyta	Magnoliopsida	Asterales	Asteraceae	Asteraceae 6
MAD170	Lombo do Moleiro	Male	72.98	8.77	Plantae	Streptophyta	Magnoliopsida	Malpighiales	Euphorbiaceae	Mercurialis annua
MAD170	Lombo do Moleiro	Male	72.98	8.77	Plantae	Streptophyta	Magnoliopsida	Poales	Poaceae	Holcus sp.1
MAD170	Lombo do Moleiro	Male	72.98	8.77	Plantae	Streptophyta	Magnoliopsida	Poales	Poaceae	Poaceae 1
MAD170	Lombo do Moleiro	Male	72.98	8.77	Plantae	Streptophyta	Magnoliopsida	Poales	Poaceae	Poaceae 3
MAD170	Lombo do Moleiro	Male	72.98	8.77	Plantae	Streptophyta	Magnoliopsida	Ranunculales	Papaveraceae	Chelidonium majus
MAD170	Lombo do Moleiro	Male	72.98	8.77	Plantae	Streptophyta	Magnoliopsida	Zingiberales	Musaceae	Musa sp.1
MAD170	Lombo do Moleiro	Male	72.98	8.77	Plantae	Streptophyta	Polypodiopsida	Polypodiales	Davalliaceae	Davallia canariensis
MAD170	Lombo do Moleiro	Male	72.98	8.77	Plantae	Streptophyta	Polypodiopsida	Polypodiales	Dennstaedtiaceae	Dennstaedtiaceae 1
MAD171	Lombo do Moleiro	Female	70.35	8.76	Animalia	Arthropoda	Arachnida	Opiliones	Ischyropsalidae	Ischyropsalis sp.2
MAD171	Lombo do Moleiro	Female	70.35	8.76	Animalia	Arthropoda	Arachnida	Opiliones	Ischyropsalididae	Ischyropsalididae 2
MAD171	Lombo do Moleiro	Female	70.35	8.76	Animalia	Arthropoda	Diplopoda	Julida	Blaniulidae	Choneiulus palmatus
MAD171	Lombo do Moleiro	Female	70.35	8.76	Animalia	Arthropoda	Insecta	Hemiptera	Pemphigidae	Eriosoma patchiae
MAD171	Lombo do Moleiro	Female	70.35	8.76	Animalia	Arthropoda	Malacostraca	Amphipoda	Talitridae	Talitroides topitotum
MAD171	Lombo do Moleiro	Female	70.35	8.76	Animalia	Arthropoda	Malacostraca	Isopoda	Armadillidiidae	Armadillidium vulgare
MAD171	Lombo do Moleiro	Female	70.35	8.76	Animalia	Mollusca	Gastropoda	Stylommatophora	Agriolimacidae	Deroceras panormitanum
MAD171	Lombo do Moleiro	Female	70.35	8.76	Animalia	Mollusca	Gastropoda	Stylommatophora	Geomitridae	Actinella nitidiuscula
MAD171	Lombo do Moleiro	Female	70.35	8.76	Plantae	Streptophyta	Magnoliopsida	Asparagales	Amaryllidaceae	Allium sp.1
MAD171	Lombo do Moleiro	Female	70.35	8.76	Plantae	Streptophyta	Magnoliopsida	Asterales	Asteraceae	Asteraceae 6
MAD171	Lombo do Moleiro	Female	70.35	8.76	Plantae	Streptophyta	Magnoliopsida	Asterales	Asteraceae	Asteraceae 8
MAD171	Lombo do Moleiro	Female	70.35	8.76	Plantae	Streptophyta	Magnoliopsida	Oxalidales	Oxalidaceae	Oxalis sp.2
MAD171	Lombo do Moleiro	Female	70.35	8.76	Plantae	Streptophyta	Magnoliopsida	Oxalidales	Oxalidaceae	Oxalis sp.3
MAD171	Lombo do Moleiro	Female	70.35	8.76	Plantae	Streptophyta	Magnoliopsida	Poales	Poaceae	Oryza sp.1
MAD171	Lombo do Moleiro	Female	70.35	8.76	Plantae	Streptophyta	Magnoliopsida	Poales	Poaceae	Poaceae 1
MAD171	Lombo do Moleiro	Female	70.35	8.76	Plantae	Streptophyta	Magnoliopsida	Zingiberales	Musaceae	Musa sp.1
MAD171	Lombo do Moleiro	Female	70.35	8.76	Plantae	Streptophyta	Pinopsida	Pinales	Pinaceae	Pinus sp.1
MAD172	Lombo do Moleiro	Female	72.14	7.82	Animalia	Arthropoda	Diplopoda	Julida	Julidae	Ommatoiulus moreleti
MAD172	Lombo do Moleiro	Female	72.14	7.82	Animalia	Arthropoda	Malacostraca	Amphipoda	Talitridae	Talitroides topitotum
MAD172	Lombo do Moleiro	Female	72.14	7.82	Animalia	Arthropoda	Malacostraca	Isopoda	Armadillidiidae	Armadillidium vulgare
MAD172	Lombo do Moleiro	Female	72.14	7.82	Animalia	Arthropoda	Malacostraca	Isopoda	Porcellionidae	Porcellionides sexfasciatus
MAD172	Lombo do Moleiro	Female	72.14	7.82	Animalia	Mollusca	Gastropoda	Stylommatophora	Agriolimacidae	Deroceras invadens
MAD172	Lombo do Moleiro	Female	72.14	7.82	Animalia	Mollusca	Gastropoda	Stylommatophora	Agriolimacidae	Deroceras panormitanum
MAD172	Lombo do Moleiro	Female	72.14	7.82	Plantae	Streptophyta	Magnoliopsida	Asparagales	Amaryllidaceae	Nothoscordum gracile
MAD172	Lombo do Moleiro	Female	72.14	7.82	Plantae	Streptophyta	Magnoliopsida	Brassicales	Brassicaceae	Brassica sp.1
MAD172	Lombo do Moleiro	Female	72.14	7.82	Plantae	Streptophyta	Magnoliopsida	Caryophyllales	Caryophyllaceae	Cerastium sp.1
MAD172	Lombo do Moleiro	Female	72.14	7.82	Plantae	Streptophyta	Magnoliopsida	Ericales	Primulaceae	Anagalis sp.1
MAD172	Lombo do Moleiro	Female	72.14	7.82	Plantae	Streptophyta	Magnoliopsida	Fabales	Fabaceae	Fabaceae 3
MAD172	Lombo do Moleiro	Female	72.14	7.82	Plantae	Streptophyta	Magnoliopsida	Fabales	Fabaceae	Fabaceae 4
MAD172	Lombo do Moleiro	Female	72.14	7.82	Plantae	Streptophyta	Magnoliopsida	Fabales	Fabaceae	Pisum sp.1
MAD172	Lombo do Moleiro	Female	72.14	7.82	Plantae	Streptophyta	Magnoliopsida	Lamiales	Lamiaceae	Mentha sp.1
MAD172	Lombo do Moleiro	Female	72.14	7.82	Plantae	Streptophyta	Magnoliopsida	Oxalidales	Oxalidaceae	Oxalis sp.3
MAD172	Lombo do Moleiro	Female	72.14	7.82	Plantae	Streptophyta	Magnoliopsida	Poales	Poaceae	Avena sp.1
MAD172	Lombo do Moleiro	Female	72.14	7.82	Plantae	Streptophyta	Magnoliopsida	Poales	Poaceae	Poa sp.1
MAD172	Lombo do Moleiro	Female	72.14	7.82	Plantae	Streptophyta	Magnoliopsida	Poales	Poaceae	Poaceae 3
MAD172	Lombo do Moleiro	Female	72.14	7.82	Plantae	Streptophyta	Magnoliopsida	Saxifragales	Crassulaceae	Crassulaceae 2
MAD172	Lombo do Moleiro	Female	72.14	7.82	Plantae	Streptophyta	Magnoliopsida	Zingiberales	Musaceae	Musa sp.1
MAD172	Lombo do Moleiro	Female	72.14	7.82	Plantae	Streptophyta	Pinopsida	Pinales	Pinaceae	Picea sp.1
MAD173	Lombo do Moleiro	Male	74.04	8.75	Animalia	Arthropoda	Malacostraca	Isopoda	Armadillidiidae	Armadillidium vulgare
MAD173	Lombo do Moleiro	Male	74.04	8.75	Plantae	Streptophyta	Magnoliopsida	Apiales	Apiaceae	Apiaceae 1
MAD173	Lombo do Moleiro	Male	74.04	8.75	Plantae	Streptophyta	Magnoliopsida	Apiales	Apiaceae	Apiaceae 2
MAD173	Lombo do Moleiro	Male	74.04	8.75	Plantae	Streptophyta	Magnoliopsida	Apiales	Araliaceae	Araliaceae 1
MAD173	Lombo do Moleiro	Male	74.04	8.75	Plantae	Streptophyta	Magnoliopsida	Asterales	Asteraceae	Asteraceae 3
MAD173	Lombo do Moleiro	Male	74.04	8.75	Plantae	Streptophyta	Magnoliopsida	Asterales	Asteraceae	Asteraceae 4
MAD173	Lombo do Moleiro	Male	74.04	8.75	Plantae	Streptophyta	Magnoliopsida	Asterales	Asteraceae	Asteraceae 6
MAD173	Lombo do Moleiro	Male	74.04	8.75	Plantae	Streptophyta	Magnoliopsida	Asterales	Asteraceae	Asteraceae 9
MAD173	Lombo do Moleiro	Male	74.04	8.75	Plantae	Streptophyta	Magnoliopsida	Brassicales	Tropaeolaceae	Tropaeolaceae 4
MAD173	Lombo do Moleiro	Male	74.04	8.75	Plantae	Streptophyta	Magnoliopsida	Caryophyllales	Polygonaceae	Rumex sp.1
MAD173	Lombo do Moleiro	Male	74.04	8.75	Plantae	Streptophyta	Magnoliopsida	Fabales	Fabaceae	Fabaceae 3
MAD173	Lombo do Moleiro	Male	74.04	8.75	Plantae	Streptophyta	Magnoliopsida	Geraniales	Geraniaceae	Geranium sp.1
MAD173	Lombo do Moleiro	Male	74.04	8.75	Plantae	Streptophyta	Magnoliopsida	Lamiales	Plantaginaceae	Plantago sp.1
MAD173	Lombo do Moleiro	Male	74.04	8.75	Plantae	Streptophyta	Magnoliopsida	Malpighiales	Salicaceae	Salix sp.1
MAD173	Lombo do Moleiro	Male	74.04	8.75	Plantae	Streptophyta	Magnoliopsida	Poales	Poaceae	Poaceae 1
MAD173	Lombo do Moleiro	Male	74.04	8.75	Plantae	Streptophyta	Magnoliopsida	Poales	Poaceae	Poaceae 3
MAD173	Lombo do Moleiro	Male	74.04	8.75	Plantae	Streptophyta	Magnoliopsida	Rosales	Rosaceae	Rosaceae 1
MAD173	Lombo do Moleiro	Male	74.04	8.75	Plantae	Streptophyta	Magnoliopsida	Sapindales	Anacardiaceae	Anacardium sp.1
MAD173	Lombo do Moleiro	Male	74.04	8.75	Plantae	Streptophyta	Magnoliopsida	Zingiberales	Musaceae	Musa sp.1
MAD173	Lombo do Moleiro	Male	74.04	8.75	Plantae	Streptophyta	Pinopsida	Pinales	Pinaceae	Pinus sp.1
MAD173	Lombo do Moleiro	Male	74.04	8.75	Plantae	Streptophyta	Polypodiopsida	Polypodiales	Dennstaedtiaceae	Dennstaedtiaceae 1
MAD174	Lombo do Moleiro	Female	56.38	4.19	Animalia	Arthropoda	Arachnida	Opiliones	Sclerosomatidae	Leiobunum blackwalli
MAD174	Lombo do Moleiro	Female	56.38	4.19	Animalia	Arthropoda	Insecta	Lepidoptera	Tineidae	Opogona omoscopa
MAD174	Lombo do Moleiro	Female	56.38	4.19	Animalia	Arthropoda	Malacostraca	Amphipoda	Talitridae	Talitroides topitotum
MAD174	Lombo do Moleiro	Female	56.38	4.19	Plantae	Streptophyta	Magnoliopsida	Asterales	Asteraceae	Asteraceae 2
MAD174	Lombo do Moleiro	Female	56.38	4.19	Plantae	Streptophyta	Magnoliopsida	Asterales	Asteraceae	Asteraceae 6
MAD174	Lombo do Moleiro	Female	56.38	4.19	Plantae	Streptophyta	Magnoliopsida	Asterales	Asteraceae	Asteraceae 9
MAD174	Lombo do Moleiro	Female	56.38	4.19	Plantae	Streptophyta	Magnoliopsida	Lamiales	Plantaginaceae	Veronica sp.2
MAD174	Lombo do Moleiro	Female	56.38	4.19	Plantae	Streptophyta	Magnoliopsida	Poales	Poaceae	Holcus sp.1
MAD174	Lombo do Moleiro	Female	56.38	4.19	Plantae	Streptophyta	Magnoliopsida	Poales	Poaceae	Poaceae 1
MAD174	Lombo do Moleiro	Female	56.38	4.19	Plantae	Streptophyta	Magnoliopsida	Poales	Poaceae	Poaceae 3
MAD174	Lombo do Moleiro	Female	56.38	4.19	Plantae	Streptophyta	Magnoliopsida	Rosales	Rosaceae	Rosaceae 1
MAD174	Lombo do Moleiro	Female	56.38	4.19	Plantae	Streptophyta	Polypodiopsida	Polypodiales	Dennstaedtiaceae	Dennstaedtiaceae 1
MAD175	Lombo do Moleiro	Male	76.17	8.84	Animalia	Arthropoda	Malacostraca	Amphipoda	Talitridae	Talitroides topitotum
MAD175	Lombo do Moleiro	Male	76.17	8.84	Animalia	Arthropoda	Malacostraca	Isopoda	Armadillidiidae	Eluma caelatum
MAD175	Lombo do Moleiro	Male	76.17	8.84	Plantae	Streptophyta	Magnoliopsida	Asterales	Asteraceae	Asteraceae 4
MAD175	Lombo do Moleiro	Male	76.17	8.84	Plantae	Streptophyta	Magnoliopsida	Ericales	Lecythidaceae	Bertholletia sp.1
MAD175	Lombo do Moleiro	Male	76.17	8.84	Plantae	Streptophyta	Magnoliopsida	Fabales	Fabaceae	Cicer sp.1
MAD175	Lombo do Moleiro	Male	76.17	8.84	Plantae	Streptophyta	Magnoliopsida	Lamiales	Plantaginaceae	Veronica sp.2
MAD175	Lombo do Moleiro	Male	76.17	8.84	Plantae	Streptophyta	Magnoliopsida	Malpighiales	Salicaceae	Populus sp.1
MAD175	Lombo do Moleiro	Male	76.17	8.84	Plantae	Streptophyta	Magnoliopsida	Poales	Poaceae	Poaceae 1
MAD175	Lombo do Moleiro	Male	76.17	8.84	Plantae	Streptophyta	Magnoliopsida	Poales	Poaceae	Poaceae 3
MAD175	Lombo do Moleiro	Male	76.17	8.84	Plantae	Streptophyta	Magnoliopsida	Sapindales	Rutaceae	Citrus sp.1
MAD175	Lombo do Moleiro	Male	76.17	8.84	Plantae	Streptophyta	Magnoliopsida	Zingiberales	Musaceae	Musa sp.1
MAD176	Lombo do Moleiro	Female	54.02	3.75	Animalia	Arthropoda	Arachnida	Araneae	Mimetidae	Ero sp.1
MAD176	Lombo do Moleiro	Female	54.02	3.75	Animalia	Arthropoda	Malacostraca	Amphipoda	Talitridae	Talitroides topitotum
MAD176	Lombo do Moleiro	Female	54.02	3.75	Animalia	Arthropoda	Malacostraca	Isopoda	Armadillidiidae	Armadillidium vulgare
MAD176	Lombo do Moleiro	Female	54.02	3.75	Animalia	Arthropoda	Malacostraca	Isopoda	Armadillidiidae	Eluma caelatum
MAD176	Lombo do Moleiro	Female	54.02	3.75	Animalia	Arthropoda	Malacostraca	Isopoda	Oniscidae	Oniscus asellus
MAD176	Lombo do Moleiro	Female	54.02	3.75	Animalia	Mollusca	Gastropoda	Stylommatophora	Milacidae	Milax gagates
MAD176	Lombo do Moleiro	Female	54.02	3.75	Plantae	Streptophyta	Magnoliopsida	Asterales	Asteraceae	Asteraceae 9
MAD176	Lombo do Moleiro	Female	54.02	3.75	Plantae	Streptophyta	Magnoliopsida	Malpighiales	Salicaceae	Populus sp.1
MAD176	Lombo do Moleiro	Female	54.02	3.75	Plantae	Streptophyta	Magnoliopsida	Poales	Poaceae	Poaceae 3
MAD176	Lombo do Moleiro	Female	54.02	3.75	Plantae	Streptophyta	Magnoliopsida	Ranunculales	Papaveraceae	Chelidonium majus
MAD176	Lombo do Moleiro	Female	54.02	3.75	Plantae	Streptophyta	Magnoliopsida	Zingiberales	Musaceae	Musa sp.1
MAD176	Lombo do Moleiro	Female	54.02	3.75	Plantae	Streptophyta	Pinopsida	Pinales	Pinaceae	Picea sp.1
MAD177	Lombo do Moleiro	Female	54.93	3.58	Animalia	Arthropoda	Malacostraca	Amphipoda	Talitridae	Talitroides topitotum
MAD177	Lombo do Moleiro	Female	54.93	3.58	Animalia	Arthropoda	Malacostraca	Isopoda	Armadillidiidae	Armadillidium vulgare
MAD177	Lombo do Moleiro	Female	54.93	3.58	Plantae	Streptophyta	Magnoliopsida	Asterales	Asteraceae	Asteraceae 4
MAD177	Lombo do Moleiro	Female	54.93	3.58	Plantae	Streptophyta	Magnoliopsida	Asterales	Asteraceae	Asteraceae 6
MAD177	Lombo do Moleiro	Female	54.93	3.58	Plantae	Streptophyta	Magnoliopsida	Geraniales	Geraniaceae	Geranium sp.1
MAD177	Lombo do Moleiro	Female	54.93	3.58	Plantae	Streptophyta	Magnoliopsida	Lamiales	Plantaginaceae	Plantago sp.1
MAD177	Lombo do Moleiro	Female	54.93	3.58	Plantae	Streptophyta	Magnoliopsida	Myrtales	Myrtaceae	Myrtaceae 1
MAD177	Lombo do Moleiro	Female	54.93	3.58	Plantae	Streptophyta	Magnoliopsida	Poales	Poaceae	Avena sp.1
MAD177	Lombo do Moleiro	Female	54.93	3.58	Plantae	Streptophyta	Magnoliopsida	Poales	Poaceae	Bromus sp.2
MAD177	Lombo do Moleiro	Female	54.93	3.58	Plantae	Streptophyta	Magnoliopsida	Poales	Poaceae	Poaceae 1
MAD177	Lombo do Moleiro	Female	54.93	3.58	Plantae	Streptophyta	Magnoliopsida	Poales	Poaceae	Poaceae 3
MAD177	Lombo do Moleiro	Female	54.93	3.58	Plantae	Streptophyta	Magnoliopsida	Sapindales	Anacardiaceae	Anacardiaceae 1
MAD177	Lombo do Moleiro	Female	54.93	3.58	Plantae	Streptophyta	Magnoliopsida	Sapindales	Sapindaceae	Acer sp.1
MAD177	Lombo do Moleiro	Female	54.93	3.58	Plantae	Streptophyta	Magnoliopsida	Zingiberales	Musaceae	Musa sp.1
MAD177	Lombo do Moleiro	Female	54.93	3.58	Plantae	Streptophyta	Pinopsida	Pinales	Pinaceae	Pinus sp.1
MAD177	Lombo do Moleiro	Female	54.93	3.58	Plantae	Streptophyta	Polypodiopsida	Polypodiales	Dennstaedtiaceae	Dennstaedtiaceae 1
MAD178	Santana	Female	52.99	3.09	Animalia	Arthropoda	Arachnida	Sarcoptiformes	Punctoribatidae	Punctoribates punctum
MAD178	Santana	Female	52.99	3.09	Animalia	Arthropoda	Diplopoda	Julida	Blaniulidae	Choneiulus palmatus
MAD178	Santana	Female	52.99	3.09	Animalia	Arthropoda	Insecta	Hemiptera	Pemphigidae	Eriosoma patchiae
MAD178	Santana	Female	52.99	3.09	Animalia	Arthropoda	Malacostraca	Amphipoda	Talitridae	Talitroides topitotum
MAD178	Santana	Female	52.99	3.09	Plantae	Streptophyta	Magnoliopsida	Oxalidales	Oxalidaceae	Oxalis sp.2
MAD178	Santana	Female	52.99	3.09	Plantae	Streptophyta	Magnoliopsida	Oxalidales	Oxalidaceae	Oxalis sp.3
MAD178	Santana	Female	52.99	3.09	Plantae	Streptophyta	Magnoliopsida	Poales	Poaceae	Poaceae 1
MAD178	Santana	Female	52.99	3.09	Plantae	Streptophyta	Magnoliopsida	Poales	Poaceae	Poaceae 3
MAD178	Santana	Female	52.99	3.09	Plantae	Streptophyta	Magnoliopsida	Rosales	Rosaceae	Rosaceae 1
MAD178	Santana	Female	52.99	3.09	Plantae	Streptophyta	Magnoliopsida	Solanales	Solanaceae	Solanum sp.1
MAD178	Santana	Female	52.99	3.09	Plantae	Streptophyta	Pinopsida	Pinales	Pinaceae	Pinus sp.1
MAD179	Santana	Male	57.33	3.92	Animalia	Arthropoda	Insecta	Lepidoptera	Tineidae	Opogona omoscopa
MAD179	Santana	Male	57.33	3.92	Animalia	Arthropoda	Malacostraca	Amphipoda	Talitridae	Talitroides topitotum
MAD179	Santana	Male	57.33	3.92	Animalia	Arthropoda	Malacostraca	Isopoda	Armadillidiidae	Armadillidium vulgare
MAD179	Santana	Male	57.33	3.92	Animalia	Mollusca	Gastropoda	Stylommatophora	Agriolimacidae	Deroceras invadens
MAD179	Santana	Male	57.33	3.92	Plantae	Streptophyta	Magnoliopsida	Oxalidales	Oxalidaceae	Oxalis sp.3
MAD179	Santana	Male	57.33	3.92	Plantae	Streptophyta	Magnoliopsida	Solanales	Solanaceae	Solanum sp.1
MAD180	Santana	Male	71.97	8.78	Animalia	Arthropoda	Malacostraca	Isopoda	Oniscidae	Oniscus asellus
MAD180	Santana	Male	71.97	8.78	Plantae	Streptophyta	Magnoliopsida	Asterales	Asteraceae	Asteraceae 6
MAD180	Santana	Male	71.97	8.78	Plantae	Streptophyta	Magnoliopsida	Brassicales	Brassicaceae	Brassicaceae 1
MAD180	Santana	Male	71.97	8.78	Plantae	Streptophyta	Magnoliopsida	Fabales	Fabaceae	Fabaceae 4
MAD180	Santana	Male	71.97	8.78	Plantae	Streptophyta	Magnoliopsida	Fagales	Fagaceae	Quercus sp.1
MAD180	Santana	Male	71.97	8.78	Plantae	Streptophyta	Magnoliopsida	Magnoliales	Annonaceae	Annonaceae 1
MAD180	Santana	Male	71.97	8.78	Plantae	Streptophyta	Magnoliopsida	Malpighiales	Salicaceae	Salix sp.1
MAD180	Santana	Male	71.97	8.78	Plantae	Streptophyta	Magnoliopsida	Oxalidales	Oxalidaceae	Oxalis sp.3
MAD180	Santana	Male	71.97	8.78	Plantae	Streptophyta	Magnoliopsida	Poales	Poaceae	Poaceae 1
MAD180	Santana	Male	71.97	8.78	Plantae	Streptophyta	Magnoliopsida	Rosales	Rosaceae	Rosaceae 1
MAD180	Santana	Male	71.97	8.78	Plantae	Streptophyta	Magnoliopsida	Sapindales	Anacardiaceae	Anacardium sp.1
MAD180	Santana	Male	71.97	8.78	Plantae	Streptophyta	Magnoliopsida	Solanales	Solanaceae	Solanum sp.1
MAD180	Santana	Male	71.97	8.78	Plantae	Streptophyta	Magnoliopsida	Solanales	Solanaceae	Solanum sp.2
MAD180	Santana	Male	71.97	8.78	Plantae	Streptophyta	Magnoliopsida	Vitales	Vitaceae	Vitaceae 1
MAD180	Santana	Male	71.97	8.78	Plantae	Streptophyta	Magnoliopsida	Zingiberales	Musaceae	Musa sp.1
MAD180	Santana	Male	71.97	8.78	Plantae	Streptophyta	Pinopsida	Pinales	Pinaceae	Pinus sp.1
MAD180	Santana	Male	71.97	8.78	Plantae	Streptophyta	Polypodiopsida	Polypodiales	Dennstaedtiaceae	Dennstaedtiaceae 1
MAD181	Santana	Male	62.63	5.38	Animalia	Arthropoda	Arachnida	Araneae	Mimetidae	Ero sp.1
MAD181	Santana	Male	62.63	5.38	Animalia	Arthropoda	Arachnida	Opiliones	Ischyropsalididae	Ischyropsalididae 3
MAD181	Santana	Male	62.63	5.38	Animalia	Arthropoda	Diplopoda	Julida	Julidae	Ommatoiulus moreleti
MAD181	Santana	Male	62.63	5.38	Animalia	Arthropoda	Insecta	Lepidoptera	Tineidae	Opogona omoscopa
MAD181	Santana	Male	62.63	5.38	Animalia	Arthropoda	Malacostraca	Amphipoda	Talitridae	Talitroides topitotum
MAD181	Santana	Male	62.63	5.38	Animalia	Arthropoda	Malacostraca	Isopoda	Armadillidiidae	Armadillidium vulgare
MAD181	Santana	Male	62.63	5.38	Animalia	Arthropoda	Malacostraca	Isopoda	Porcellionidae	Porcellionides sexfasciatus
MAD181	Santana	Male	62.63	5.38	Plantae	Streptophyta	Magnoliopsida	Asterales	Asteraceae	Asteraceae 4
MAD181	Santana	Male	62.63	5.38	Plantae	Streptophyta	Magnoliopsida	Asterales	Asteraceae	Asteraceae 6
MAD181	Santana	Male	62.63	5.38	Plantae	Streptophyta	Magnoliopsida	Asterales	Asteraceae	Asteraceae 8
MAD181	Santana	Male	62.63	5.38	Plantae	Streptophyta	Magnoliopsida	Commelinales	Commelinaceae	Tradescantia sp.1
MAD181	Santana	Male	62.63	5.38	Plantae	Streptophyta	Magnoliopsida	Fagales	Betulaceae	Betulaceae 1
MAD181	Santana	Male	62.63	5.38	Plantae	Streptophyta	Magnoliopsida	Fagales	Fagaceae	Quercus sp.1
MAD181	Santana	Male	62.63	5.38	Plantae	Streptophyta	Magnoliopsida	Fagales	Myricaceae	Myricaceae 1
MAD181	Santana	Male	62.63	5.38	Plantae	Streptophyta	Magnoliopsida	Gentianales	Rubiaceae	Galium sp.2
MAD181	Santana	Male	62.63	5.38	Plantae	Streptophyta	Magnoliopsida	Malpighiales	Salicaceae	Salix sp.1
MAD181	Santana	Male	62.63	5.38	Plantae	Streptophyta	Magnoliopsida	Poales	Poaceae	Poaceae 3
MAD181	Santana	Male	62.63	5.38	Plantae	Streptophyta	Magnoliopsida	Rosales	Rosaceae	Rosaceae 1
MAD181	Santana	Male	62.63	5.38	Plantae	Streptophyta	Magnoliopsida	Sapindales	Anacardiaceae	Anacardium sp.1
MAD181	Santana	Male	62.63	5.38	Plantae	Streptophyta	Magnoliopsida	Solanales	Solanaceae	Solanum sp.2
MAD181	Santana	Male	62.63	5.38	Plantae	Streptophyta	Pinopsida	Pinales	Pinaceae	Picea sp.1
MAD181	Santana	Male	62.63	5.38	Plantae	Streptophyta	Polypodiopsida	Polypodiales	Dennstaedtiaceae	Dennstaedtiaceae 1
MAD183	Santana	Male	50.27	5.57	Animalia	Arthropoda	Insecta	Lepidoptera	Tineidae	Opogona omoscopa
MAD183	Santana	Male	50.27	5.57	Animalia	Arthropoda	Malacostraca	Isopoda	Armadillidiidae	Armadillidium vulgare
MAD183	Santana	Male	50.27	5.57	Plantae	Streptophyta	Magnoliopsida	Asterales	Asteraceae	Asteraceae 3
MAD183	Santana	Male	50.27	5.57	Plantae	Streptophyta	Magnoliopsida	Caryophyllales	Caryophyllaceae	Caryophyllaceae 1
MAD183	Santana	Male	50.27	5.57	Plantae	Streptophyta	Magnoliopsida	Caryophyllales	Caryophyllaceae	Silene sp.1
MAD183	Santana	Male	50.27	5.57	Plantae	Streptophyta	Magnoliopsida	Fabales	Fabaceae	Fabaceae 4
MAD183	Santana	Male	50.27	5.57	Plantae	Streptophyta	Magnoliopsida	Fabales	Fabaceae	Trifolium sp.1
MAD183	Santana	Male	50.27	5.57	Plantae	Streptophyta	Magnoliopsida	Fagales	Fagaceae	Quercus sp.1
MAD183	Santana	Male	50.27	5.57	Plantae	Streptophyta	Magnoliopsida	Lamiales	Lamiaceae	Lamiaceae 1
MAD183	Santana	Male	50.27	5.57	Plantae	Streptophyta	Magnoliopsida	Malpighiales	Salicaceae	Salix sp.1
MAD183	Santana	Male	50.27	5.57	Plantae	Streptophyta	Magnoliopsida	Oxalidales	Oxalidaceae	Oxalis sp.3
MAD183	Santana	Male	50.27	5.57	Plantae	Streptophyta	Magnoliopsida	Poales	Poaceae	Poaceae 1
MAD183	Santana	Male	50.27	5.57	Plantae	Streptophyta	Magnoliopsida	Poales	Poaceae	Poaceae 3
MAD183	Santana	Male	50.27	5.57	Plantae	Streptophyta	Magnoliopsida	Sapindales	Rutaceae	Citrus sp.1
MAD183	Santana	Male	50.27	5.57	Plantae	Streptophyta	Magnoliopsida	Solanales	Solanaceae	Solanum sp.2
MAD183	Santana	Male	50.27	5.57	Plantae	Streptophyta	Pinopsida	Pinales	Pinaceae	Picea sp.1
MAD183	Santana	Male	50.27	5.57	Plantae	Streptophyta	Pinopsida	Pinales	Pinaceae	Pinus sp.1
MAD184	Santana	Male	61.49	5.03	Animalia	Arthropoda	Insecta	Diptera	Mycetophilidae	Leia winthemi
MAD184	Santana	Male	61.49	5.03	Animalia	Arthropoda	Insecta	Diptera	Stratiomyidae	Stratiomyidae 1
MAD184	Santana	Male	61.49	5.03	Animalia	Arthropoda	Insecta	Hymenoptera	Ichneumonidae	Aclastus micator
MAD184	Santana	Male	61.49	5.03	Plantae	Streptophyta	Magnoliopsida	Caryophyllales	Caryophyllaceae	Caryophyllaceae 1
MAD184	Santana	Male	61.49	5.03	Plantae	Streptophyta	Magnoliopsida	Caryophyllales	Polygonaceae	Rumex sp.1
MAD184	Santana	Male	61.49	5.03	Plantae	Streptophyta	Magnoliopsida	Commelinales	Commelinaceae	Tradescantia sp.1
MAD184	Santana	Male	61.49	5.03	Plantae	Streptophyta	Magnoliopsida	Fabales	Fabaceae	Fabaceae 2
MAD184	Santana	Male	61.49	5.03	Plantae	Streptophyta	Magnoliopsida	Malpighiales	Salicaceae	Salix sp.1
MAD184	Santana	Male	61.49	5.03	Plantae	Streptophyta	Magnoliopsida	Poales	Poaceae	Poaceae 1
MAD184	Santana	Male	61.49	5.03	Plantae	Streptophyta	Magnoliopsida	Poales	Poaceae	Poaceae 3
MAD184	Santana	Male	61.49	5.03	Plantae	Streptophyta	Magnoliopsida	Solanales	Solanaceae	Solanaceae 4
MAD184	Santana	Male	61.49	5.03	Plantae	Streptophyta	Magnoliopsida	Solanales	Solanaceae	Solanum sp.1
MAD184	Santana	Male	61.49	5.03	Plantae	Streptophyta	Magnoliopsida	Solanales	Solanaceae	Solanum sp.2
MAD185	Santana	Male	58.32	4.27	Animalia	Arthropoda	Malacostraca	Amphipoda	Talitridae	Talitroides topitotum
MAD185	Santana	Male	58.32	4.27	Animalia	Arthropoda	Malacostraca	Isopoda	Oniscidae	Oniscus asellus
MAD185	Santana	Male	58.32	4.27	Plantae	Streptophyta	Magnoliopsida	Poales	Poaceae	Poaceae 1
MAD185	Santana	Male	58.32	4.27	Plantae	Streptophyta	Magnoliopsida	Ranunculales	Ranunculaceae	Ranunculus sp.1
MAD185	Santana	Male	58.32	4.27	Plantae	Streptophyta	Magnoliopsida	Solanales	Solanaceae	Solanum sp.1
MAD187	Santana	Female	58.6	4.85	Animalia	Arthropoda	Arachnida	Araneae	Clubionidae	Porrhoclubiona sp.1
MAD187	Santana	Female	58.6	4.85	Animalia	Arthropoda	Arachnida	Opiliones	Ischyropsalididae	Ischyropsalididae 1
MAD187	Santana	Female	58.6	4.85	Animalia	Arthropoda	Insecta	Diptera	Calliphoridae	Hemigymnochaeta unicolor
MAD187	Santana	Female	58.6	4.85	Animalia	Arthropoda	Malacostraca	Amphipoda	Talitridae	Talitroides topitotum
MAD187	Santana	Female	58.6	4.85	Plantae	Streptophyta	Magnoliopsida	Apiales	Pittosporaceae	Pittosporaceae 1
MAD187	Santana	Female	58.6	4.85	Plantae	Streptophyta	Magnoliopsida	Fabales	Fabaceae	Fabaceae 4
MAD187	Santana	Female	58.6	4.85	Plantae	Streptophyta	Magnoliopsida	Lamiales	Lamiaceae	Lamiaceae 1
MAD187	Santana	Female	58.6	4.85	Plantae	Streptophyta	Magnoliopsida	Poales	Poaceae	Poaceae 3
MAD187	Santana	Female	58.6	4.85	Plantae	Streptophyta	Magnoliopsida	Vitales	Vitaceae	Vitaceae 1
MAD187	Santana	Female	58.6	4.85	Plantae	Streptophyta	Pinopsida	Pinales	Pinaceae	Picea sp.1
MAD189	Santana	Male	78.39	13.41	Animalia	Arthropoda	Malacostraca	Isopoda	Armadillidiidae	Armadillidium vulgare
MAD189	Santana	Male	78.39	13.41	Plantae	Streptophyta	Magnoliopsida	Asterales	Asteraceae	Asteraceae 6
MAD189	Santana	Male	78.39	13.41	Plantae	Streptophyta	Magnoliopsida	Caryophyllales	Caryophyllaceae	Caryophyllaceae 1
MAD189	Santana	Male	78.39	13.41	Plantae	Streptophyta	Magnoliopsida	Dipsacales	Caprifoliaceae	Abelia sp.1
MAD189	Santana	Male	78.39	13.41	Plantae	Streptophyta	Magnoliopsida	Malpighiales	Euphorbiaceae	Euphorbiaceae 2
MAD189	Santana	Male	78.39	13.41	Plantae	Streptophyta	Magnoliopsida	Malvales	Malvaceae	Malvaceae 2
MAD189	Santana	Male	78.39	13.41	Plantae	Streptophyta	Magnoliopsida	Zingiberales	Musaceae	Musa sp.1
MAD189	Santana	Male	78.39	13.41	Plantae	Streptophyta	Pinopsida	Pinales	Pinaceae	Pinus sp.1
MAD190	Santana	Male	55.59	3.97	Animalia	Arthropoda	Insecta	Blattodea	Blattidae	Periplaneta americana
MAD190	Santana	Male	55.59	3.97	Animalia	Arthropoda	Malacostraca	Isopoda	Armadillidiidae	Armadillidium vulgare
MAD190	Santana	Male	55.59	3.97	Plantae	Streptophyta	Magnoliopsida	Asterales	Asteraceae	Asteraceae 3
MAD190	Santana	Male	55.59	3.97	Plantae	Streptophyta	Magnoliopsida	Asterales	Asteraceae	Asteraceae 6
MAD190	Santana	Male	55.59	3.97	Plantae	Streptophyta	Magnoliopsida	Lamiales	Lamiaceae	Lamiaceae 1
MAD190	Santana	Male	55.59	3.97	Plantae	Streptophyta	Magnoliopsida	Zingiberales	Musaceae	Musa sp.1
MAD190	Santana	Male	55.59	3.97	Plantae	Streptophyta	Pinopsida	Pinales	Pinaceae	Picea sp.1
MAD191	Santana	Male	76.79	10.48	Animalia	Arthropoda	Arachnida	Opiliones	Ischyropsalidae	Ischyropsalis sp.1
MAD191	Santana	Male	76.79	10.48	Animalia	Arthropoda	Arachnida	Opiliones	Ischyropsalidae	Ischyropsalis sp.2
MAD191	Santana	Male	76.79	10.48	Animalia	Arthropoda	Arachnida	Opiliones	Ischyropsalididae	Ischyropsalididae 1
MAD191	Santana	Male	76.79	10.48	Animalia	Arthropoda	Arachnida	Opiliones	Ischyropsalididae	Ischyropsalididae 2
MAD191	Santana	Male	76.79	10.48	Animalia	Arthropoda	Arachnida	Opiliones	Ischyropsalididae	Ischyropsalididae 3
MAD191	Santana	Male	76.79	10.48	Plantae	Streptophyta	Magnoliopsida	Asterales	Asteraceae	Asteraceae 4
MAD191	Santana	Male	76.79	10.48	Plantae	Streptophyta	Magnoliopsida	Asterales	Asteraceae	Taraxacum sp.1
MAD191	Santana	Male	76.79	10.48	Plantae	Streptophyta	Magnoliopsida	Commelinales	Commelinaceae	Tradescantia sp.1
MAD191	Santana	Male	76.79	10.48	Plantae	Streptophyta	Magnoliopsida	Dipsacales	Caprifoliaceae	Abelia sp.1
MAD191	Santana	Male	76.79	10.48	Plantae	Streptophyta	Magnoliopsida	Malpighiales	Salicaceae	Salix sp.1
MAD191	Santana	Male	76.79	10.48	Plantae	Streptophyta	Magnoliopsida	Malvales	Malvaceae	Gossypium sp.1
MAD191	Santana	Male	76.79	10.48	Plantae	Streptophyta	Magnoliopsida	Oxalidales	Oxalidaceae	Oxalis sp.3
MAD191	Santana	Male	76.79	10.48	Plantae	Streptophyta	Magnoliopsida	Poales	Poaceae	Poaceae 1
MAD191	Santana	Male	76.79	10.48	Plantae	Streptophyta	Magnoliopsida	Poales	Poaceae	Poaceae 3
MAD191	Santana	Male	76.79	10.48	Plantae	Streptophyta	Magnoliopsida	Ranunculales	Ranunculaceae	Ranunculus sp.1
MAD191	Santana	Male	76.79	10.48	Plantae	Streptophyta	Magnoliopsida	Rosales	Rosaceae	Rosaceae 1
MAD191	Santana	Male	76.79	10.48	Plantae	Streptophyta	Magnoliopsida	Solanales	Solanaceae	Solanum sp.1
MAD191	Santana	Male	76.79	10.48	Plantae	Streptophyta	Magnoliopsida	Solanales	Solanaceae	Solanum sp.2
MAD191	Santana	Male	76.79	10.48	Plantae	Streptophyta	Magnoliopsida	Zingiberales	Musaceae	Musa sp.1
MAD191	Santana	Male	76.79	10.48	Plantae	Streptophyta	Pinopsida	Pinales	Pinaceae	Picea sp.1
MAD191	Santana	Male	76.79	10.48	Plantae	Streptophyta	Polypodiopsida	Polypodiales	Dennstaedtiaceae	Dennstaedtiaceae 1
MAD192	Santana	Male	56.67	4.4	Animalia	Arthropoda	Malacostraca	Isopoda	Armadillidiidae	Armadillidium vulgare
MAD192	Santana	Male	56.67	4.4	Plantae	Streptophyta	Magnoliopsida	Apiales	Araliaceae	Araliaceae 1
MAD192	Santana	Male	56.67	4.4	Plantae	Streptophyta	Magnoliopsida	Asterales	Asteraceae	Asteraceae 3
MAD192	Santana	Male	56.67	4.4	Plantae	Streptophyta	Magnoliopsida	Asterales	Asteraceae	Asteraceae 4
MAD192	Santana	Male	56.67	4.4	Plantae	Streptophyta	Magnoliopsida	Asterales	Asteraceae	Asteraceae 6
MAD192	Santana	Male	56.67	4.4	Plantae	Streptophyta	Magnoliopsida	Dipsacales	Caprifoliaceae	Abelia sp.1
MAD192	Santana	Male	56.67	4.4	Plantae	Streptophyta	Magnoliopsida	Fabales	Fabaceae	Fabaceae 3
MAD192	Santana	Male	56.67	4.4	Plantae	Streptophyta	Magnoliopsida	Fabales	Fabaceae	Trifolium sp.1
MAD192	Santana	Male	56.67	4.4	Plantae	Streptophyta	Magnoliopsida	Malpighiales	Salicaceae	Salix sp.1
MAD192	Santana	Male	56.67	4.4	Plantae	Streptophyta	Magnoliopsida	Poales	Poaceae	Poaceae 3
MAD192	Santana	Male	56.67	4.4	Plantae	Streptophyta	Magnoliopsida	Rosales	Rosaceae	Rosaceae 2
MAD192	Santana	Male	56.67	4.4	Plantae	Streptophyta	Magnoliopsida	Sapindales	Meliaceae	Meliaceae 2
MAD192	Santana	Male	56.67	4.4	Plantae	Streptophyta	Magnoliopsida	Solanales	Solanaceae	Solanum sp.1
MAD192	Santana	Male	56.67	4.4	Plantae	Streptophyta	Magnoliopsida	Zingiberales	Musaceae	Musa sp.1
MAD193	Santana	Female	50.77	3.03	Animalia	Arthropoda	Arachnida	Araneae	Salticidae	Salticidae 1
MAD193	Santana	Female	50.77	3.03	Animalia	Arthropoda	Arachnida	Opiliones	Sclerosomatidae	Leiobunum blackwalli
MAD193	Santana	Female	50.77	3.03	Animalia	Arthropoda	Insecta	Coleoptera	Silvanidae	Cryptamorpha desjardinsii
MAD193	Santana	Female	50.77	3.03	Animalia	Arthropoda	Insecta	Lepidoptera	Tineidae	Opogona omoscopa
MAD193	Santana	Female	50.77	3.03	Animalia	Arthropoda	Malacostraca	Isopoda	Armadillidiidae	Armadillidium vulgare
MAD193	Santana	Female	50.77	3.03	Animalia	Arthropoda	Malacostraca	Isopoda	Porcellionidae	Porcellionides pruinosus
MAD193	Santana	Female	50.77	3.03	Animalia	Mollusca	Gastropoda	Stylommatophora	Helicidae	Helix aspersa
MAD193	Santana	Female	50.77	3.03	Plantae	Streptophyta	Magnoliopsida	Asterales	Asteraceae	Asteraceae 3
MAD193	Santana	Female	50.77	3.03	Plantae	Streptophyta	Magnoliopsida	Asterales	Asteraceae	Asteraceae 6
MAD193	Santana	Female	50.77	3.03	Plantae	Streptophyta	Magnoliopsida	Caryophyllales	Caryophyllaceae	Cerastium sp.1
MAD193	Santana	Female	50.77	3.03	Plantae	Streptophyta	Magnoliopsida	Oxalidales	Oxalidaceae	Oxalis sp.2
MAD193	Santana	Female	50.77	3.03	Plantae	Streptophyta	Magnoliopsida	Poales	Poaceae	Holcus sp.1
MAD193	Santana	Female	50.77	3.03	Plantae	Streptophyta	Magnoliopsida	Poales	Poaceae	Poaceae 3
MAD193	Santana	Female	50.77	3.03	Plantae	Streptophyta	Magnoliopsida	Rosales	Rosaceae	Rosaceae 1
MAD193	Santana	Female	50.77	3.03	Plantae	Streptophyta	Magnoliopsida	Solanales	Convolvulaceae	Convolvulaceae 1
MAD193	Santana	Female	50.77	3.03	Plantae	Streptophyta	Magnoliopsida	Solanales	Solanaceae	Solanum sp.1
MAD193	Santana	Female	50.77	3.03	Plantae	Streptophyta	Magnoliopsida	Solanales	Solanaceae	Solanum sp.2
MAD193	Santana	Female	50.77	3.03	Plantae	Streptophyta	Magnoliopsida	Zingiberales	Musaceae	Musa sp.1
MAD193	Santana	Female	50.77	3.03	Plantae	Streptophyta	Polypodiopsida	Cyatheales	Cyatheaceae	Cyatheaceae 1
MAD194	Santana	Male	73.25	9.7	Animalia	Arthropoda	Malacostraca	Isopoda	Armadillidiidae	Armadillidium vulgare
MAD194	Santana	Male	73.25	9.7	Animalia	Arthropoda	Malacostraca	Isopoda	Armadillidiidae	Eluma caelatum
MAD194	Santana	Male	73.25	9.7	Animalia	Arthropoda	Malacostraca	Isopoda	Porcellionidae	Porcellionides sexfasciatus
MAD194	Santana	Male	73.25	9.7	Plantae	Streptophyta	Magnoliopsida	Apiales	Apiaceae	Apiaceae 2
MAD194	Santana	Male	73.25	9.7	Plantae	Streptophyta	Magnoliopsida	Asterales	Asteraceae	Asteraceae 4
MAD194	Santana	Male	73.25	9.7	Plantae	Streptophyta	Magnoliopsida	Asterales	Asteraceae	Asteraceae 8
MAD194	Santana	Male	73.25	9.7	Plantae	Streptophyta	Magnoliopsida	Lamiales	Plantaginaceae	Plantago sp.1
MAD194	Santana	Male	73.25	9.7	Plantae	Streptophyta	Magnoliopsida	Malpighiales	Euphorbiaceae	Euphorbia sp.1
MAD194	Santana	Male	73.25	9.7	Plantae	Streptophyta	Magnoliopsida	Poales	Poaceae	Poaceae 1
MAD194	Santana	Male	73.25	9.7	Plantae	Streptophyta	Magnoliopsida	Poales	Poaceae	Poaceae 3
MAD194	Santana	Male	73.25	9.7	Plantae	Streptophyta	Magnoliopsida	Zingiberales	Musaceae	Musa sp.1
MAD195	Santana	Male	58.14	5.05	Animalia	Arthropoda	Arachnida	Araneae	Clubionidae	Porrhoclubiona sp.1
MAD195	Santana	Male	58.14	5.05	Animalia	Arthropoda	Insecta	Hymenoptera	Formicidae	Technomyrmex pallipes
MAD195	Santana	Male	58.14	5.05	Animalia	Arthropoda	Insecta	Lepidoptera	Tineidae	Opogona omoscopa
MAD195	Santana	Male	58.14	5.05	Animalia	Arthropoda	Malacostraca	Isopoda	Armadillidiidae	Armadillidium vulgare
MAD195	Santana	Male	58.14	5.05	Animalia	Chordata	Reptilia	Squamata	Phyllodactylidae	Tarentola mauritanica
MAD195	Santana	Male	58.14	5.05	Animalia	Mollusca	Gastropoda	Stylommatophora	Agriolimacidae	Deroceras invadens
MAD195	Santana	Male	58.14	5.05	Plantae	Streptophyta	Magnoliopsida	Caryophyllales	Polygonaceae	Rumex sp.1
MAD195	Santana	Male	58.14	5.05	Plantae	Streptophyta	Magnoliopsida	Solanales	Solanaceae	Solanum sp.1
MAD195	Santana	Male	58.14	5.05	Plantae	Streptophyta	Pinopsida	Pinales	Pinaceae	Picea sp.1
MAD196	Santana	Male	67.12	7.22	Animalia	Arthropoda	Arachnida	Sarcoptiformes	Punctoribatidae	Punctoribates punctum
MAD196	Santana	Male	67.12	7.22	Animalia	Arthropoda	Insecta	Lepidoptera	Tineidae	Opogona omoscopa
MAD196	Santana	Male	67.12	7.22	Animalia	Arthropoda	Malacostraca	Isopoda	Armadillidiidae	Armadillidium vulgare
MAD196	Santana	Male	67.12	7.22	Animalia	Arthropoda	Malacostraca	Isopoda	Armadillidiidae	Eluma caelatum
MAD196	Santana	Male	67.12	7.22	Plantae	Streptophyta	Magnoliopsida	Fabales	Fabaceae	Lotus sp.1
MAD196	Santana	Male	67.12	7.22	Plantae	Streptophyta	Magnoliopsida	Fabales	Fabaceae	Trifolium sp.1
MAD196	Santana	Male	67.12	7.22	Plantae	Streptophyta	Magnoliopsida	Fagales	Fagaceae	Quercus sp.1
MAD196	Santana	Male	67.12	7.22	Plantae	Streptophyta	Magnoliopsida	Gentianales	Rubiaceae	Galium sp.2
MAD196	Santana	Male	67.12	7.22	Plantae	Streptophyta	Magnoliopsida	Poales	Poaceae	Poaceae 1
MAD196	Santana	Male	67.12	7.22	Plantae	Streptophyta	Magnoliopsida	Poales	Poaceae	Poaceae 3
MAD196	Santana	Male	67.12	7.22	Plantae	Streptophyta	Magnoliopsida	Rosales	Ulmaceae	Ulmaceae 2
MAD196	Santana	Male	67.12	7.22	Plantae	Streptophyta	Magnoliopsida	Solanales	Solanaceae	Solanum sp.1
MAD196	Santana	Male	67.12	7.22	Plantae	Streptophyta	Magnoliopsida	Solanales	Solanaceae	Solanum sp.2
MAD197	Santana	Female	54.9	3.67	Animalia	Arthropoda	Arachnida	Opiliones	Ischyropsalididae	Ischyropsalididae 3
MAD197	Santana	Female	54.9	3.67	Animalia	Arthropoda	Arachnida	Sarcoptiformes	Punctoribatidae	Punctoribates punctum
MAD197	Santana	Female	54.9	3.67	Animalia	Arthropoda	Diplopoda	Julida	Julidae	Ommatoiulus moreleti
MAD197	Santana	Female	54.9	3.67	Animalia	Arthropoda	Insecta	Hemiptera	Pemphigidae	Eriosoma patchiae
MAD197	Santana	Female	54.9	3.67	Animalia	Arthropoda	Insecta	Hymenoptera	Formicidae	Paratrechina longicornis
MAD197	Santana	Female	54.9	3.67	Animalia	Arthropoda	Malacostraca	Isopoda	Armadillidiidae	Armadillidium vulgare
MAD197	Santana	Female	54.9	3.67	Plantae	Streptophyta	Magnoliopsida	Fabales	Fabaceae	Fabaceae 3
MAD197	Santana	Female	54.9	3.67	Plantae	Streptophyta	Magnoliopsida	Gentianales	Rubiaceae	Rubiaceae 1
MAD197	Santana	Female	54.9	3.67	Plantae	Streptophyta	Magnoliopsida	Lamiales	Lamiaceae	Lamiaceae 1
MAD197	Santana	Female	54.9	3.67	Plantae	Streptophyta	Magnoliopsida	Poales	Poaceae	Poaceae 3
MAD197	Santana	Female	54.9	3.67	Plantae	Streptophyta	Magnoliopsida	Zingiberales	Musaceae	Musa sp.1
MAD197	Santana	Female	54.9	3.67	Plantae	Streptophyta	Pinopsida	Pinales	Pinaceae	Picea sp.1
MAD198	Santana	Male	59.55	4.81	Animalia	Arthropoda	Insecta	Lepidoptera	Tineidae	Opogona omoscopa
MAD198	Santana	Male	59.55	4.81	Animalia	Mollusca	Gastropoda	Stylommatophora	Agriolimacidae	Deroceras invadens
MAD198	Santana	Male	59.55	4.81	Animalia	Mollusca	Gastropoda	Stylommatophora	Agriolimacidae	Deroceras panormitanum
MAD198	Santana	Male	59.55	4.81	Plantae	Streptophyta	Magnoliopsida	Commelinales	Commelinaceae	Tradescantia sp.1
MAD198	Santana	Male	59.55	4.81	Plantae	Streptophyta	Magnoliopsida	Fabales	Fabaceae	Chamaecrista sp.1
MAD198	Santana	Male	59.55	4.81	Plantae	Streptophyta	Magnoliopsida	Fabales	Fabaceae	Fabaceae 4
MAD198	Santana	Male	59.55	4.81	Plantae	Streptophyta	Magnoliopsida	Fagales	Fagaceae	Quercus sp.1
MAD198	Santana	Male	59.55	4.81	Plantae	Streptophyta	Magnoliopsida	Malpighiales	Salicaceae	Salix sp.1
MAD198	Santana	Male	59.55	4.81	Plantae	Streptophyta	Magnoliopsida	Rosales	Rosaceae	Rosaceae 1
MAD198	Santana	Male	59.55	4.81	Plantae	Streptophyta	Magnoliopsida	Zingiberales	Musaceae	Musa sp.1
MAD199	Santana	Male	73.52	8.96	Animalia	Arthropoda	Diplopoda	Polydesmida	Polydesmidae	Polydesmus coriaceus
MAD199	Santana	Male	73.52	8.96	Animalia	Arthropoda	Insecta	Hymenoptera	Formicidae	Technomyrmex pallipes
MAD199	Santana	Male	73.52	8.96	Animalia	Mollusca	Gastropoda	Stylommatophora	Helicidae	Helix aspersa
MAD199	Santana	Male	73.52	8.96	Plantae	Streptophyta	Magnoliopsida	Solanales	Convolvulaceae	Ipomoea sp.1
MAD199	Santana	Male	73.52	8.96	Plantae	Streptophyta	Magnoliopsida	Zingiberales	Musaceae	Musa sp.1
MAD2	Funchal	Male	77.59	12.23	Animalia	Arthropoda	Insecta	Hemiptera	Aphididae	Longicaudinus corydalisicola
MAD2	Funchal	Male	77.59	12.23	Animalia	Arthropoda	Malacostraca	Isopoda	Armadillidiidae	Armadillidium vulgare
MAD2	Funchal	Male	77.59	12.23	Animalia	Mollusca	Gastropoda	Stylommatophora	Agriolimacidae	Deroceras panormitanum
MAD2	Funchal	Male	77.59	12.23	Plantae	Streptophyta	Magnoliopsida	Asterales	Asteraceae	Asteraceae 4
MAD2	Funchal	Male	77.59	12.23	Plantae	Streptophyta	Magnoliopsida	Asterales	Asteraceae	Asteraceae 8
MAD2	Funchal	Male	77.59	12.23	Plantae	Streptophyta	Magnoliopsida	Asterales	Asteraceae	Asteraceae 9
MAD2	Funchal	Male	77.59	12.23	Plantae	Streptophyta	Magnoliopsida	Fabales	Fabaceae	Pisum sp.1
MAD2	Funchal	Male	77.59	12.23	Plantae	Streptophyta	Magnoliopsida	Malpighiales	Euphorbiaceae	Euphorbia sp.1
MAD2	Funchal	Male	77.59	12.23	Plantae	Streptophyta	Magnoliopsida	Malpighiales	Passifloraceae	Passiflora sp.1
MAD2	Funchal	Male	77.59	12.23	Plantae	Streptophyta	Magnoliopsida	Malpighiales	Phyllanthaceae	Phyllanthaceae 1
MAD2	Funchal	Male	77.59	12.23	Plantae	Streptophyta	Magnoliopsida	Myrtales	Myrtaceae	Myrtaceae 1
MAD2	Funchal	Male	77.59	12.23	Plantae	Streptophyta	Magnoliopsida	Oxalidales	Oxalidaceae	Oxalis sp.3
MAD2	Funchal	Male	77.59	12.23	Plantae	Streptophyta	Magnoliopsida	Poales	Poaceae	Poaceae 1
MAD2	Funchal	Male	77.59	12.23	Plantae	Streptophyta	Magnoliopsida	Poales	Poaceae	Poaceae 3
MAD2	Funchal	Male	77.59	12.23	Plantae	Streptophyta	Magnoliopsida	Rosales	Urticaceae	Parietaria sp.1
MAD2	Funchal	Male	77.59	12.23	Plantae	Streptophyta	Magnoliopsida	Rosales	Urticaceae	Urticaceae 1
MAD2	Funchal	Male	77.59	12.23	Plantae	Streptophyta	Magnoliopsida	Sapindales	Sapindaceae	Cardiospermum grandiflorum
MAD2	Funchal	Male	77.59	12.23	Plantae	Streptophyta	Magnoliopsida	Solanales	Solanaceae	Capsicum sp.1
MAD2	Funchal	Male	77.59	12.23	Plantae	Streptophyta	Magnoliopsida	Solanales	Solanaceae	Solanum sp.1
MAD2	Funchal	Male	77.59	12.23	Plantae	Streptophyta	Magnoliopsida	Zingiberales	Musaceae	Musa sp.1
MAD20	Funchal	Female	70.35	7.48	Animalia	Arthropoda	Arachnida	Araneae	Gnaphosidae	Zelotes tenuis
MAD20	Funchal	Female	70.35	7.48	Animalia	Arthropoda	Arachnida	Araneae	Salticidae	Salticus sp.1
MAD20	Funchal	Female	70.35	7.48	Animalia	Arthropoda	Diplopoda	Julida	Julidae	Ommatoiulus moreleti
MAD20	Funchal	Female	70.35	7.48	Animalia	Arthropoda	Malacostraca	Isopoda	Armadillidiidae	Armadillidium vulgare
MAD20	Funchal	Female	70.35	7.48	Animalia	Mollusca	Gastropoda	Stylommatophora	Agriolimacidae	Deroceras panormitanum
MAD20	Funchal	Female	70.35	7.48	Plantae	Streptophyta	Magnoliopsida	Asparagales	Iridaceae	Iridaceae 1
MAD20	Funchal	Female	70.35	7.48	Plantae	Streptophyta	Magnoliopsida	Asterales	Asteraceae	Asteraceae 4
MAD20	Funchal	Female	70.35	7.48	Plantae	Streptophyta	Magnoliopsida	Caryophyllales	Caryophyllaceae	Cerastium sp.1
MAD20	Funchal	Female	70.35	7.48	Plantae	Streptophyta	Magnoliopsida	Oxalidales	Oxalidaceae	Oxalis sp.3
MAD20	Funchal	Female	70.35	7.48	Plantae	Streptophyta	Magnoliopsida	Poales	Poaceae	Bromus sp.1
MAD20	Funchal	Female	70.35	7.48	Plantae	Streptophyta	Magnoliopsida	Poales	Poaceae	Poaceae 1
MAD20	Funchal	Female	70.35	7.48	Plantae	Streptophyta	Magnoliopsida	Poales	Poaceae	Poaceae 3
MAD20	Funchal	Female	70.35	7.48	Plantae	Streptophyta	Magnoliopsida	Ranunculales	Papaveraceae	Fumaria sp.1
MAD20	Funchal	Female	70.35	7.48	Plantae	Streptophyta	Magnoliopsida	Zingiberales	Musaceae	Musa sp.1
MAD200	Santana	Female	58.59	3.95	Animalia	Arthropoda	Collembola	Symphypleona	Sminthuridae	Allacma fusca
MAD200	Santana	Female	58.59	3.95	Animalia	Arthropoda	Diplopoda	Julida	Julidae	Ommatoiulus moreleti
MAD200	Santana	Female	58.59	3.95	Animalia	Arthropoda	Insecta	Diptera	Limoniidae	Limoniidae 1
MAD200	Santana	Female	58.59	3.95	Animalia	Arthropoda	Insecta	Diptera	Sciaridae	Dolichosciara flavipes
MAD200	Santana	Female	58.59	3.95	Animalia	Arthropoda	Insecta	Lepidoptera	Tineidae	Opogona omoscopa
MAD200	Santana	Female	58.59	3.95	Animalia	Arthropoda	Malacostraca	Amphipoda	Talitridae	Talitroides topitotum
MAD200	Santana	Female	58.59	3.95	Animalia	Arthropoda	Malacostraca	Isopoda	Armadillidiidae	Armadillidium vulgare
MAD200	Santana	Female	58.59	3.95	Animalia	Mollusca	Gastropoda	Stylommatophora	Agriolimacidae	Deroceras invadens
MAD200	Santana	Female	58.59	3.95	Animalia	Mollusca	Gastropoda	Stylommatophora	Agriolimacidae	Deroceras panormitanum
MAD200	Santana	Female	58.59	3.95	Plantae	Streptophyta	Magnoliopsida	Brassicales	Brassicaceae	Cardamine hirsuta
MAD200	Santana	Female	58.59	3.95	Plantae	Streptophyta	Magnoliopsida	Caryophyllales	Caryophyllaceae	Cerastium sp.1
MAD200	Santana	Female	58.59	3.95	Plantae	Streptophyta	Magnoliopsida	Commelinales	Commelinaceae	Tradescantia sp.1
MAD200	Santana	Female	58.59	3.95	Plantae	Streptophyta	Magnoliopsida	Fabales	Fabaceae	Lotus sp.1
MAD200	Santana	Female	58.59	3.95	Plantae	Streptophyta	Magnoliopsida	Malpighiales	Euphorbiaceae	Euphorbia sp.1
MAD200	Santana	Female	58.59	3.95	Plantae	Streptophyta	Magnoliopsida	Malpighiales	Salicaceae	Salix sp.1
MAD200	Santana	Female	58.59	3.95	Plantae	Streptophyta	Magnoliopsida	Poales	Poaceae	Poaceae 3
MAD200	Santana	Female	58.59	3.95	Plantae	Streptophyta	Magnoliopsida	Solanales	Solanaceae	Solanum sp.2
MAD200	Santana	Female	58.59	3.95	Plantae	Streptophyta	Pinopsida	Pinales	Pinaceae	Pinus sp.1
MAD201	Paúl da Serra	Male	75.06	11.6	Animalia	Arthropoda	Insecta	Coleoptera	Carabidae	Harpalus attenuatus
MAD201	Paúl da Serra	Male	75.06	11.6	Animalia	Arthropoda	Insecta	Diptera	Syrphidae	Sphaerophoria sp.1
MAD201	Paúl da Serra	Male	75.06	11.6	Plantae	Streptophyta	Magnoliopsida	Asterales	Asteraceae	Asteraceae 3
MAD201	Paúl da Serra	Male	75.06	11.6	Plantae	Streptophyta	Magnoliopsida	Asterales	Asteraceae	Asteraceae 4
MAD201	Paúl da Serra	Male	75.06	11.6	Plantae	Streptophyta	Magnoliopsida	Cornales	Hydrangeaceae	Hydrangea sp.1
MAD201	Paúl da Serra	Male	75.06	11.6	Plantae	Streptophyta	Magnoliopsida	Ericales	Ericaceae	Ericaceae 1
MAD201	Paúl da Serra	Male	75.06	11.6	Plantae	Streptophyta	Magnoliopsida	Ericales	Lecythidaceae	Bertholletia sp.1
MAD201	Paúl da Serra	Male	75.06	11.6	Plantae	Streptophyta	Magnoliopsida	Fabales	Fabaceae	Lotus sp.1
MAD201	Paúl da Serra	Male	75.06	11.6	Plantae	Streptophyta	Magnoliopsida	Fagales	Juglandaceae	Juglandaceae 1
MAD201	Paúl da Serra	Male	75.06	11.6	Plantae	Streptophyta	Magnoliopsida	Poales	Poaceae	Poaceae 1
MAD201	Paúl da Serra	Male	75.06	11.6	Plantae	Streptophyta	Magnoliopsida	Poales	Poaceae	Poaceae 3
MAD201	Paúl da Serra	Male	75.06	11.6	Plantae	Streptophyta	Magnoliopsida	Zingiberales	Musaceae	Musa sp.1
MAD201	Paúl da Serra	Male	75.06	11.6	Plantae	Streptophyta	Pinopsida	Pinales	Pinaceae	Picea sp.1
MAD201	Paúl da Serra	Male	75.06	11.6	Plantae	Streptophyta	Pinopsida	Pinales	Pinaceae	Pinus sp.1
MAD201	Paúl da Serra	Male	75.06	11.6	Plantae	Streptophyta	Polypodiopsida	Polypodiales	Dennstaedtiaceae	Dennstaedtiaceae 1
MAD202	Paúl da Serra	Female	59.69	4.73	Animalia	Arthropoda	Arachnida	Opiliones	Ischyropsalididae	Ischyropsalididae 2
MAD202	Paúl da Serra	Female	59.69	4.73	Animalia	Arthropoda	Arachnida	Opiliones	Ischyropsalididae	Ischyropsalididae 3
MAD202	Paúl da Serra	Female	59.69	4.73	Animalia	Arthropoda	Malacostraca	Isopoda	Armadillidiidae	Armadillidium vulgare
MAD202	Paúl da Serra	Female	59.69	4.73	Animalia	Arthropoda	Malacostraca	Isopoda	Porcellionidae	Porcellionides sexfasciatus
MAD202	Paúl da Serra	Female	59.69	4.73	Animalia	Mollusca	Gastropoda	Stylommatophora	Agriolimacidae	Deroceras panormitanum
MAD202	Paúl da Serra	Female	59.69	4.73	Plantae	Streptophyta	Magnoliopsida	Asterales	Asteraceae	Chrysanthemum sp.1
MAD202	Paúl da Serra	Female	59.69	4.73	Plantae	Streptophyta	Magnoliopsida	Brassicales	Brassicaceae	Brassica sp.1
MAD202	Paúl da Serra	Female	59.69	4.73	Plantae	Streptophyta	Magnoliopsida	Brassicales	Moringaceae	Moringaceae 1
MAD202	Paúl da Serra	Female	59.69	4.73	Plantae	Streptophyta	Magnoliopsida	Fabales	Fabaceae	Bituminaria sp.1
MAD202	Paúl da Serra	Female	59.69	4.73	Plantae	Streptophyta	Magnoliopsida	Fabales	Fabaceae	Fabaceae 2
MAD202	Paúl da Serra	Female	59.69	4.73	Plantae	Streptophyta	Magnoliopsida	Malpighiales	Euphorbiaceae	Euphorbiaceae 2
MAD202	Paúl da Serra	Female	59.69	4.73	Plantae	Streptophyta	Magnoliopsida	Malvales	Cistaceae	Helianthemum sp.1
MAD202	Paúl da Serra	Female	59.69	4.73	Plantae	Streptophyta	Magnoliopsida	Malvales	Malvaceae	Malvaceae 1
MAD202	Paúl da Serra	Female	59.69	4.73	Plantae	Streptophyta	Magnoliopsida	Poales	Poaceae	Poaceae 3
MAD202	Paúl da Serra	Female	59.69	4.73	Plantae	Streptophyta	Magnoliopsida	Zingiberales	Musaceae	Musa sp.1
MAD203	Paúl da Serra	Male	72.09	9.38	Animalia	Arthropoda	Malacostraca	Isopoda	Armadillidiidae	Armadillidium vulgare
MAD203	Paúl da Serra	Male	72.09	9.38	Plantae	Streptophyta	Magnoliopsida	Asparagales	Amaryllidaceae	Amaryllidaceae 1
MAD203	Paúl da Serra	Male	72.09	9.38	Plantae	Streptophyta	Magnoliopsida	Asterales	Asteraceae	Asteraceae 4
MAD203	Paúl da Serra	Male	72.09	9.38	Plantae	Streptophyta	Magnoliopsida	Asterales	Asteraceae	Asteraceae 6
MAD203	Paúl da Serra	Male	72.09	9.38	Plantae	Streptophyta	Magnoliopsida	Caryophyllales	Caryophyllaceae	Cerastium sp.1
MAD203	Paúl da Serra	Male	72.09	9.38	Plantae	Streptophyta	Magnoliopsida	Dipsacales	Caprifoliaceae	Abelia sp.1
MAD203	Paúl da Serra	Male	72.09	9.38	Plantae	Streptophyta	Magnoliopsida	Malpighiales	Salicaceae	Salix sp.1
MAD203	Paúl da Serra	Male	72.09	9.38	Plantae	Streptophyta	Magnoliopsida	Poales	Poaceae	Poaceae 3
MAD203	Paúl da Serra	Male	72.09	9.38	Plantae	Streptophyta	Magnoliopsida	Sapindales	Rutaceae	Citrus sp.1
MAD203	Paúl da Serra	Male	72.09	9.38	Plantae	Streptophyta	Magnoliopsida	Zingiberales	Musaceae	Musa sp.1
MAD204	Paúl da Serra	Female	52.96	2.55	Animalia	Arthropoda	Insecta	Lepidoptera	Tineidae	Oinophila v-flava
MAD204	Paúl da Serra	Female	52.96	2.55	Animalia	Arthropoda	Malacostraca	Isopoda	Armadillidiidae	Armadillidium vulgare
MAD204	Paúl da Serra	Female	52.96	2.55	Animalia	Arthropoda	Malacostraca	Isopoda	Armadillidiidae	Eluma caelatum
MAD204	Paúl da Serra	Female	52.96	2.55	Plantae	Streptophyta	Magnoliopsida	Brassicales	Brassicaceae	Brassicaceae 1
MAD204	Paúl da Serra	Female	52.96	2.55	Plantae	Streptophyta	Magnoliopsida	Ericales	Ericaceae	Ericaceae 1
MAD204	Paúl da Serra	Female	52.96	2.55	Plantae	Streptophyta	Magnoliopsida	Fabales	Fabaceae	Fabaceae 2
MAD204	Paúl da Serra	Female	52.96	2.55	Plantae	Streptophyta	Magnoliopsida	Fagales	Betulaceae	Betulaceae 1
MAD204	Paúl da Serra	Female	52.96	2.55	Plantae	Streptophyta	Magnoliopsida	Lamiales	Oleaceae	Oleaceae 1
MAD204	Paúl da Serra	Female	52.96	2.55	Plantae	Streptophyta	Magnoliopsida	Myrtales	Lythraceae	Lythraceae 1
MAD204	Paúl da Serra	Female	52.96	2.55	Plantae	Streptophyta	Magnoliopsida	Oxalidales	Oxalidaceae	Oxalis sp.3
MAD204	Paúl da Serra	Female	52.96	2.55	Plantae	Streptophyta	Magnoliopsida	Poales	Poaceae	Poaceae 1
MAD204	Paúl da Serra	Female	52.96	2.55	Plantae	Streptophyta	Magnoliopsida	Poales	Poaceae	Poaceae 3
MAD204	Paúl da Serra	Female	52.96	2.55	Plantae	Streptophyta	Magnoliopsida	Zingiberales	Musaceae	Musa sp.1
MAD204	Paúl da Serra	Female	52.96	2.55	Plantae	Streptophyta	Pinopsida	Pinales	Pinaceae	Picea sp.1
MAD207	Paúl da Serra	Female	54	3.56	Animalia	Arthropoda	Diplopoda	Julida	Julidae	Ommatoiulus moreleti
MAD207	Paúl da Serra	Female	54	3.56	Animalia	Arthropoda	Malacostraca	Isopoda	Armadillidiidae	Armadillidium vulgare
MAD207	Paúl da Serra	Female	54	3.56	Animalia	Arthropoda	Malacostraca	Isopoda	Armadillidiidae	Eluma caelatum
MAD207	Paúl da Serra	Female	54	3.56	Plantae	Streptophyta	Magnoliopsida	Cornales	Hydrangeaceae	Hydrangea sp.1
MAD207	Paúl da Serra	Female	54	3.56	Plantae	Streptophyta	Magnoliopsida	Ericales	Ericaceae	Ericaceae 1
MAD207	Paúl da Serra	Female	54	3.56	Plantae	Streptophyta	Magnoliopsida	Fabales	Fabaceae	Cicer sp.1
MAD207	Paúl da Serra	Female	54	3.56	Plantae	Streptophyta	Magnoliopsida	Fabales	Fabaceae	Fabaceae 2
MAD207	Paúl da Serra	Female	54	3.56	Plantae	Streptophyta	Magnoliopsida	Fabales	Fabaceae	Fabaceae 3
MAD207	Paúl da Serra	Female	54	3.56	Plantae	Streptophyta	Magnoliopsida	Fabales	Fabaceae	Ulex sp.1
MAD207	Paúl da Serra	Female	54	3.56	Plantae	Streptophyta	Magnoliopsida	Malpighiales	Euphorbiaceae	Euphorbiaceae 1
MAD207	Paúl da Serra	Female	54	3.56	Plantae	Streptophyta	Magnoliopsida	Poales	Poaceae	Poaceae 3
MAD207	Paúl da Serra	Female	54	3.56	Plantae	Streptophyta	Magnoliopsida	Rosales	Moraceae	Morus sp.1
MAD207	Paúl da Serra	Female	54	3.56	Plantae	Streptophyta	Magnoliopsida	Rosales	Rosaceae	Rosaceae 2
MAD207	Paúl da Serra	Female	54	3.56	Plantae	Streptophyta	Magnoliopsida	Zingiberales	Musaceae	Musa sp.1
MAD208	Paúl da Serra	Male	54.82	3.32	Animalia	Arthropoda	Insecta	Coleoptera	Carabidae	Harpalus attenuatus
MAD208	Paúl da Serra	Male	54.82	3.32	Animalia	Arthropoda	Malacostraca	Isopoda	Armadillidiidae	Armadillidium vulgare
MAD208	Paúl da Serra	Male	54.82	3.32	Animalia	Arthropoda	Malacostraca	Isopoda	Oniscidae	Oniscus asellus
MAD208	Paúl da Serra	Male	54.82	3.32	Plantae	Streptophyta	Magnoliopsida	Fabales	Fabaceae	Fabaceae 2
MAD208	Paúl da Serra	Male	54.82	3.32	Plantae	Streptophyta	Magnoliopsida	Fabales	Fabaceae	Trifolium sp.1
MAD208	Paúl da Serra	Male	54.82	3.32	Plantae	Streptophyta	Magnoliopsida	Fagales	Fagaceae	Quercus sp.1
MAD208	Paúl da Serra	Male	54.82	3.32	Plantae	Streptophyta	Magnoliopsida	Poales	Poaceae	Poaceae 3
MAD208	Paúl da Serra	Male	54.82	3.32	Plantae	Streptophyta	Magnoliopsida	Rosales	Rosaceae	Rosaceae 2
MAD208	Paúl da Serra	Male	54.82	3.32	Plantae	Streptophyta	Magnoliopsida	Solanales	Solanaceae	Solanum sp.1
MAD208	Paúl da Serra	Male	54.82	3.32	Plantae	Streptophyta	Magnoliopsida	Zingiberales	Musaceae	Musa sp.1
MAD209	Paúl da Serra	Female	51.1	2.51	Animalia	Arthropoda	Insecta	Blattodea	Blattidae	Periplaneta americana
MAD209	Paúl da Serra	Female	51.1	2.51	Animalia	Arthropoda	Insecta	Hymenoptera	Formicidae	Technomyrmex pallipes
MAD209	Paúl da Serra	Female	51.1	2.51	Animalia	Arthropoda	Malacostraca	Isopoda	Armadillidiidae	Armadillidium vulgare
MAD209	Paúl da Serra	Female	51.1	2.51	Animalia	Chordata	Reptilia	Squamata	Phyllodactylidae	Tarentola mauritanica
MAD209	Paúl da Serra	Female	51.1	2.51	Plantae	Streptophyta	Magnoliopsida	Asparagales	Amaryllidaceae	Allium sp.1
MAD209	Paúl da Serra	Female	51.1	2.51	Plantae	Streptophyta	Magnoliopsida	Fagales	Fagaceae	Quercus sp.1
MAD209	Paúl da Serra	Female	51.1	2.51	Plantae	Streptophyta	Magnoliopsida	Poales	Poaceae	Poaceae 3
MAD209	Paúl da Serra	Female	51.1	2.51	Plantae	Streptophyta	Magnoliopsida	Sapindales	Anacardiaceae	Anacardium sp.1
MAD209	Paúl da Serra	Female	51.1	2.51	Plantae	Streptophyta	Magnoliopsida	Zingiberales	Musaceae	Musa sp.1
MAD21	Funchal	Male	61.31	5.04	Animalia	Arthropoda	Malacostraca	Isopoda	Armadillidiidae	Armadillidium vulgare
MAD21	Funchal	Male	61.31	5.04	Animalia	Arthropoda	Malacostraca	Isopoda	Porcellionidae	Agabiformius lentus
MAD21	Funchal	Male	61.31	5.04	Animalia	Arthropoda	Malacostraca	Isopoda	Porcellionidae	Porcellionides sexfasciatus
MAD21	Funchal	Male	61.31	5.04	Plantae	Streptophyta	Magnoliopsida	Asterales	Asteraceae	Asteraceae 5
MAD21	Funchal	Male	61.31	5.04	Plantae	Streptophyta	Magnoliopsida	Caryophyllales	Nyctaginaceae	Bougainvillea sp.1
MAD21	Funchal	Male	61.31	5.04	Plantae	Streptophyta	Magnoliopsida	Caryophyllales	Tamaricaceae	Tamarix sp.1
MAD21	Funchal	Male	61.31	5.04	Plantae	Streptophyta	Magnoliopsida	Cucurbitales	Begoniaceae	Begonia sp.1
MAD21	Funchal	Male	61.31	5.04	Plantae	Streptophyta	Magnoliopsida	Fabales	Fabaceae	Fabaceae 3
MAD21	Funchal	Male	61.31	5.04	Plantae	Streptophyta	Magnoliopsida	Lamiales	Acanthaceae	Acanthaceae 1
MAD21	Funchal	Male	61.31	5.04	Plantae	Streptophyta	Magnoliopsida	Malpighiales	Passifloraceae	Passiflora sp.1
MAD21	Funchal	Male	61.31	5.04	Plantae	Streptophyta	Magnoliopsida	Oxalidales	Oxalidaceae	Oxalis sp.3
MAD21	Funchal	Male	61.31	5.04	Plantae	Streptophyta	Magnoliopsida	Poales	Poaceae	Poaceae 1
MAD21	Funchal	Male	61.31	5.04	Plantae	Streptophyta	Magnoliopsida	Zingiberales	Musaceae	Musa sp.1
MAD210	Paúl da Serra	Female	57.4	4.5	Animalia	Arthropoda	Arachnida	Araneae	Mimetidae	Ero sp.1
MAD210	Paúl da Serra	Female	57.4	4.5	Animalia	Arthropoda	Arachnida	Araneae	Mimetidae	Ero tuberculata
MAD210	Paúl da Serra	Female	57.4	4.5	Animalia	Arthropoda	Malacostraca	Isopoda	Armadillidiidae	Armadillidium vulgare
MAD210	Paúl da Serra	Female	57.4	4.5	Plantae	Streptophyta	Magnoliopsida	Caryophyllales	Caryophyllaceae	Cerastium sp.1
MAD210	Paúl da Serra	Female	57.4	4.5	Plantae	Streptophyta	Magnoliopsida	Caryophyllales	Polygonaceae	Rumex sp.1
MAD210	Paúl da Serra	Female	57.4	4.5	Plantae	Streptophyta	Magnoliopsida	Poales	Poaceae	Poaceae 3
MAD210	Paúl da Serra	Female	57.4	4.5	Plantae	Streptophyta	Magnoliopsida	Sapindales	Sapindaceae	Acer sp.1
MAD210	Paúl da Serra	Female	57.4	4.5	Plantae	Streptophyta	Polypodiopsida	Polypodiales	Dennstaedtiaceae	Dennstaedtiaceae 1
MAD211	Paúl da Serra	Male	51.87	2.73	Animalia	Arthropoda	Insecta	Coleoptera	Carabidae	Harpalus attenuatus
MAD211	Paúl da Serra	Male	51.87	2.73	Plantae	Streptophyta	Magnoliopsida	Ericales	Ericaceae	Ericaceae 1
MAD211	Paúl da Serra	Male	51.87	2.73	Plantae	Streptophyta	Magnoliopsida	Fabales	Fabaceae	Fabaceae 2
MAD211	Paúl da Serra	Male	51.87	2.73	Plantae	Streptophyta	Magnoliopsida	Fagales	Juglandaceae	Juglandaceae 1
MAD211	Paúl da Serra	Male	51.87	2.73	Plantae	Streptophyta	Magnoliopsida	Malpighiales	Euphorbiaceae	Euphorbiaceae 1
MAD211	Paúl da Serra	Male	51.87	2.73	Plantae	Streptophyta	Magnoliopsida	Poales	Poaceae	Poaceae 1
MAD211	Paúl da Serra	Male	51.87	2.73	Plantae	Streptophyta	Magnoliopsida	Poales	Poaceae	Poaceae 3
MAD211	Paúl da Serra	Male	51.87	2.73	Plantae	Streptophyta	Magnoliopsida	Rosales	Rosaceae	Prunus sp.1
MAD211	Paúl da Serra	Male	51.87	2.73	Plantae	Streptophyta	Pinopsida	Pinales	Pinaceae	Picea sp.1
MAD212	Paúl da Serra	Male	62.56	5.26	Animalia	Arthropoda	Arachnida	Araneae	Mimetidae	Ero sp.1
MAD212	Paúl da Serra	Male	62.56	5.26	Animalia	Arthropoda	Malacostraca	Isopoda	Armadillidiidae	Eluma caelatum
MAD212	Paúl da Serra	Male	62.56	5.26	Plantae	Streptophyta	Magnoliopsida	Cornales	Hydrangeaceae	Hydrangea sp.1
MAD212	Paúl da Serra	Male	62.56	5.26	Plantae	Streptophyta	Magnoliopsida	Fagales	Fagaceae	Quercus sp.1
MAD212	Paúl da Serra	Male	62.56	5.26	Plantae	Streptophyta	Magnoliopsida	Lamiales	Plantaginaceae	Globularia sp.1
MAD212	Paúl da Serra	Male	62.56	5.26	Plantae	Streptophyta	Magnoliopsida	Solanales	Solanaceae	Solanum sp.1
MAD212	Paúl da Serra	Male	62.56	5.26	Plantae	Streptophyta	Magnoliopsida	Solanales	Solanaceae	Solanum sp.2
MAD213	Paúl da Serra	Male	70.2	6.44	Animalia	Arthropoda	Arachnida	Trombidiformes	Eupodidae	Eupodidae 1
MAD213	Paúl da Serra	Male	70.2	6.44	Animalia	Arthropoda	Malacostraca	Isopoda	Porcellionidae	Porcellionides sexfasciatus
MAD213	Paúl da Serra	Male	70.2	6.44	Animalia	Mollusca	Gastropoda	Stylommatophora	Oxychilidae	Oxychilus alliarius
MAD213	Paúl da Serra	Male	70.2	6.44	Plantae	Streptophyta	Magnoliopsida	Asterales	Asteraceae	Asteraceae 3
MAD213	Paúl da Serra	Male	70.2	6.44	Plantae	Streptophyta	Magnoliopsida	Asterales	Asteraceae	Asteraceae 4
MAD213	Paúl da Serra	Male	70.2	6.44	Plantae	Streptophyta	Magnoliopsida	Boraginales	Boraginaceae	Boraginaceae 1
MAD213	Paúl da Serra	Male	70.2	6.44	Plantae	Streptophyta	Magnoliopsida	Brassicales	Moringaceae	Moringaceae 1
MAD213	Paúl da Serra	Male	70.2	6.44	Plantae	Streptophyta	Magnoliopsida	Caryophyllales	Caryophyllaceae	Caryophyllaceae 1
MAD213	Paúl da Serra	Male	70.2	6.44	Plantae	Streptophyta	Magnoliopsida	Cornales	Hydrangeaceae	Hydrangea sp.1
MAD213	Paúl da Serra	Male	70.2	6.44	Plantae	Streptophyta	Magnoliopsida	Fabales	Fabaceae	Arachis sp.1
MAD213	Paúl da Serra	Male	70.2	6.44	Plantae	Streptophyta	Magnoliopsida	Fabales	Fabaceae	Fabaceae 2
MAD213	Paúl da Serra	Male	70.2	6.44	Plantae	Streptophyta	Magnoliopsida	Fabales	Fabaceae	Trifolium sp.1
MAD213	Paúl da Serra	Male	70.2	6.44	Plantae	Streptophyta	Magnoliopsida	Fabales	Fabaceae	Ulex sp.1
MAD213	Paúl da Serra	Male	70.2	6.44	Plantae	Streptophyta	Magnoliopsida	Malpighiales	Hypericaceae	Hypericum sp.1
MAD213	Paúl da Serra	Male	70.2	6.44	Plantae	Streptophyta	Magnoliopsida	Poales	Poaceae	Poaceae 1
MAD213	Paúl da Serra	Male	70.2	6.44	Plantae	Streptophyta	Magnoliopsida	Poales	Poaceae	Poaceae 3
MAD213	Paúl da Serra	Male	70.2	6.44	Plantae	Streptophyta	Magnoliopsida	Rosales	Rosaceae	Rosaceae 1
MAD213	Paúl da Serra	Male	70.2	6.44	Plantae	Streptophyta	Magnoliopsida	Saxifragales	Crassulaceae	Crassula sp.1
MAD213	Paúl da Serra	Male	70.2	6.44	Plantae	Streptophyta	Magnoliopsida	Solanales	Solanaceae	Solanum sp.1
MAD213	Paúl da Serra	Male	70.2	6.44	Plantae	Streptophyta	Magnoliopsida	Zingiberales	Musaceae	Musa sp.1
MAD22	Funchal	Female	65.24	6.34	Animalia	Arthropoda	Diplopoda	Julida	Julidae	Ommatoiulus moreleti
MAD22	Funchal	Female	65.24	6.34	Animalia	Arthropoda	Insecta	Hymenoptera	Formicidae	Technomyrmex pallipes
MAD22	Funchal	Female	65.24	6.34	Animalia	Arthropoda	Insecta	Lepidoptera	Tineidae	Opogona omoscopa
MAD22	Funchal	Female	65.24	6.34	Animalia	Arthropoda	Malacostraca	Isopoda	Armadillidiidae	Armadillidium vulgare
MAD22	Funchal	Female	65.24	6.34	Plantae	Streptophyta	Magnoliopsida	Sapindales	Rutaceae	Citrus sp.1
MAD22	Funchal	Female	65.24	6.34	Plantae	Streptophyta	Magnoliopsida	Zingiberales	Musaceae	Musa sp.1
MAD23	Funchal	Female	59.33	4.51	Animalia	Arthropoda	Insecta	Lepidoptera	Tineidae	Opogona sacari
MAD23	Funchal	Female	59.33	4.51	Animalia	Arthropoda	Malacostraca	Isopoda	Armadillidiidae	Armadillidium vulgare
MAD23	Funchal	Female	59.33	4.51	Plantae	Streptophyta	Magnoliopsida	Lamiales	Acanthaceae	Acanthaceae 1
MAD23	Funchal	Female	59.33	4.51	Plantae	Streptophyta	Magnoliopsida	Malpighiales	Euphorbiaceae	Euphorbia sp.1
MAD23	Funchal	Female	59.33	4.51	Plantae	Streptophyta	Magnoliopsida	Oxalidales	Oxalidaceae	Oxalis sp.3
MAD23	Funchal	Female	59.33	4.51	Plantae	Streptophyta	Magnoliopsida	Rosales	Moraceae	Morus sp.1
MAD23	Funchal	Female	59.33	4.51	Plantae	Streptophyta	Magnoliopsida	Sapindales	Anacardiaceae	Anacardiaceae 1
MAD23	Funchal	Female	59.33	4.51	Plantae	Streptophyta	Magnoliopsida	Zingiberales	Musaceae	Musa sp.1
MAD3	Funchal	Male	76.57	11.91	Animalia	Arthropoda	Diplopoda	Julida	Julidae	Ommatoiulus moreleti
MAD3	Funchal	Male	76.57	11.91	Animalia	Arthropoda	Insecta	Hymenoptera	Formicidae	Technomyrmex pallipes
MAD3	Funchal	Male	76.57	11.91	Animalia	Arthropoda	Malacostraca	Isopoda	Armadillidiidae	Armadillidium vulgare
MAD3	Funchal	Male	76.57	11.91	Plantae	Streptophyta	Magnoliopsida	Asterales	Asteraceae	Asteraceae 8
MAD3	Funchal	Male	76.57	11.91	Plantae	Streptophyta	Magnoliopsida	Brassicales	Brassicaceae	Brassica sp.1
MAD3	Funchal	Male	76.57	11.91	Plantae	Streptophyta	Magnoliopsida	Caryophyllales	Amaranthaceae	Achyranthes aspera
MAD3	Funchal	Male	76.57	11.91	Plantae	Streptophyta	Magnoliopsida	Caryophyllales	Amaranthaceae	Achyranthes sp.1
MAD3	Funchal	Male	76.57	11.91	Plantae	Streptophyta	Magnoliopsida	Caryophyllales	Amaranthaceae	Amaranthaceae 1
MAD3	Funchal	Male	76.57	11.91	Plantae	Streptophyta	Magnoliopsida	Malpighiales	Ochnaceae	Ochnaceae 1
MAD3	Funchal	Male	76.57	11.91	Plantae	Streptophyta	Magnoliopsida	Malpighiales	Passifloraceae	Passiflora sp.1
MAD3	Funchal	Male	76.57	11.91	Plantae	Streptophyta	Magnoliopsida	Myrtales	Myrtaceae	Myrtaceae 1
MAD3	Funchal	Male	76.57	11.91	Plantae	Streptophyta	Magnoliopsida	Oxalidales	Oxalidaceae	Oxalis sp.3
MAD3	Funchal	Male	76.57	11.91	Plantae	Streptophyta	Magnoliopsida	Rosales	Urticaceae	Urticaceae 1
MAD3	Funchal	Male	76.57	11.91	Plantae	Streptophyta	Magnoliopsida	Zingiberales	Musaceae	Musa sp.1
MAD32	Eira do Serrado	Male	63.81	6.15	Animalia	Arthropoda	Arachnida	Araneae	Gnaphosidae	Zelotes tenuis
MAD32	Eira do Serrado	Male	63.81	6.15	Animalia	Arthropoda	Malacostraca	Isopoda	Porcellionidae	Porcellionides pruinosus
MAD32	Eira do Serrado	Male	63.81	6.15	Animalia	Arthropoda	Malacostraca	Isopoda	Porcellionidae	Porcellionides sexfasciatus
MAD32	Eira do Serrado	Male	63.81	6.15	Plantae	Streptophyta	Magnoliopsida	Brassicales	Brassicaceae	Brassicaceae 1
MAD32	Eira do Serrado	Male	63.81	6.15	Plantae	Streptophyta	Magnoliopsida	Myrtales	Myrtaceae	Myrtaceae 1
MAD32	Eira do Serrado	Male	63.81	6.15	Plantae	Streptophyta	Magnoliopsida	Poales	Poaceae	Avena sp.1
MAD32	Eira do Serrado	Male	63.81	6.15	Plantae	Streptophyta	Magnoliopsida	Poales	Poaceae	Poaceae 3
MAD32	Eira do Serrado	Male	63.81	6.15	Plantae	Streptophyta	Magnoliopsida	Sapindales	Rutaceae	Citrus sp.1
MAD32	Eira do Serrado	Male	63.81	6.15	Plantae	Streptophyta	Magnoliopsida	Solanales	Solanaceae	Solanum sp.1
MAD32	Eira do Serrado	Male	63.81	6.15	Plantae	Streptophyta	Magnoliopsida	Zingiberales	Musaceae	Musa sp.1
MAD32	Eira do Serrado	Male	63.81	6.15	Plantae	Streptophyta	Pinopsida	Pinales	Pinaceae	Pinus sp.1
MAD34	Eira do Serrado	Female	52.31	2.83	Animalia	Arthropoda	Diplopoda	Julida	Blaniulidae	Choneiulus palmatus
MAD34	Eira do Serrado	Female	52.31	2.83	Plantae	Streptophyta	Magnoliopsida	Asterales	Asteraceae	Asteraceae 6
MAD34	Eira do Serrado	Female	52.31	2.83	Plantae	Streptophyta	Magnoliopsida	Asterales	Asteraceae	Asteraceae 8
MAD34	Eira do Serrado	Female	52.31	2.83	Plantae	Streptophyta	Magnoliopsida	Brassicales	Tropaeolaceae	Tropaeolaceae 8
MAD34	Eira do Serrado	Female	52.31	2.83	Plantae	Streptophyta	Magnoliopsida	Caryophyllales	Caryophyllaceae	Cerastium sp.1
MAD34	Eira do Serrado	Female	52.31	2.83	Plantae	Streptophyta	Magnoliopsida	Cornales	Hydrangeaceae	Hydrangea sp.1
MAD34	Eira do Serrado	Female	52.31	2.83	Plantae	Streptophyta	Magnoliopsida	Fabales	Fabaceae	Fabaceae 3
MAD34	Eira do Serrado	Female	52.31	2.83	Plantae	Streptophyta	Magnoliopsida	Malpighiales	Euphorbiaceae	Euphorbiaceae 1
MAD34	Eira do Serrado	Female	52.31	2.83	Plantae	Streptophyta	Magnoliopsida	Malvales	Malvaceae	Malvaceae 1
MAD34	Eira do Serrado	Female	52.31	2.83	Plantae	Streptophyta	Magnoliopsida	Poales	Poaceae	Poaceae 3
MAD34	Eira do Serrado	Female	52.31	2.83	Plantae	Streptophyta	Magnoliopsida	Sapindales	Rutaceae	Citrus sp.1
MAD34	Eira do Serrado	Female	52.31	2.83	Plantae	Streptophyta	Magnoliopsida	Solanales	Solanaceae	Solanum sp.1
MAD34	Eira do Serrado	Female	52.31	2.83	Plantae	Streptophyta	Magnoliopsida	Solanales	Solanaceae	Solanum sp.2
MAD34	Eira do Serrado	Female	52.31	2.83	Plantae	Streptophyta	Magnoliopsida	Zingiberales	Musaceae	Musa sp.1
MAD34	Eira do Serrado	Female	52.31	2.83	Plantae	Streptophyta	Pinopsida	Pinales	Pinaceae	Pinus sp.1
MAD35	Eira do Serrado	Male	64.72	7.01	Animalia	Arthropoda	Diplopoda	Julida	Blaniulidae	Proteroiulus fuscus
MAD35	Eira do Serrado	Male	64.72	7.01	Animalia	Arthropoda	Malacostraca	Isopoda	Armadillidiidae	Armadillidium vulgare
MAD35	Eira do Serrado	Male	64.72	7.01	Animalia	Arthropoda	Malacostraca	Isopoda	Porcellionidae	Porcellionides sexfasciatus
MAD35	Eira do Serrado	Male	64.72	7.01	Plantae	Streptophyta	Magnoliopsida	Boraginales	Boraginaceae	Boraginaceae 1
MAD35	Eira do Serrado	Male	64.72	7.01	Plantae	Streptophyta	Magnoliopsida	Caryophyllales	Polygonaceae	Rumex sp.1
MAD35	Eira do Serrado	Male	64.72	7.01	Plantae	Streptophyta	Magnoliopsida	Fabales	Fabaceae	Arachis sp.1
MAD35	Eira do Serrado	Male	64.72	7.01	Plantae	Streptophyta	Magnoliopsida	Fagales	Fagaceae	Quercus sp.1
MAD35	Eira do Serrado	Male	64.72	7.01	Plantae	Streptophyta	Magnoliopsida	Rosales	Rosaceae	Rosaceae 1
MAD35	Eira do Serrado	Male	64.72	7.01	Plantae	Streptophyta	Magnoliopsida	Sapindales	Rutaceae	Citrus sp.1
MAD35	Eira do Serrado	Male	64.72	7.01	Plantae	Streptophyta	Magnoliopsida	Zingiberales	Musaceae	Musa sp.1
MAD37	Eira do Serrado	Female	57.78	3.65	Animalia	Arthropoda	Malacostraca	Isopoda	Armadillidiidae	Armadillidium vulgare
MAD37	Eira do Serrado	Female	57.78	3.65	Animalia	Mollusca	Gastropoda	Stylommatophora	Limacidae	Lehmannia nyctelia
MAD37	Eira do Serrado	Female	57.78	3.65	Plantae	Streptophyta	Magnoliopsida	Apiales	Apiaceae	Apiaceae 2
MAD37	Eira do Serrado	Female	57.78	3.65	Plantae	Streptophyta	Magnoliopsida	Asterales	Asteraceae	Arctotis venusta
MAD37	Eira do Serrado	Female	57.78	3.65	Plantae	Streptophyta	Magnoliopsida	Asterales	Asteraceae	Asteraceae 4
MAD37	Eira do Serrado	Female	57.78	3.65	Plantae	Streptophyta	Magnoliopsida	Asterales	Asteraceae	Asteraceae 6
MAD37	Eira do Serrado	Female	57.78	3.65	Plantae	Streptophyta	Magnoliopsida	Brassicales	Tropaeolaceae	Tropaeolaceae 4
MAD37	Eira do Serrado	Female	57.78	3.65	Plantae	Streptophyta	Magnoliopsida	Caryophyllales	Caryophyllaceae	Cerastium sp.1
MAD37	Eira do Serrado	Female	57.78	3.65	Plantae	Streptophyta	Magnoliopsida	Caryophyllales	Polygonaceae	Rumex sp.1
MAD37	Eira do Serrado	Female	57.78	3.65	Plantae	Streptophyta	Magnoliopsida	Caryophyllales	Tamaricaceae	Tamarix sp.1
MAD37	Eira do Serrado	Female	57.78	3.65	Plantae	Streptophyta	Magnoliopsida	Ericales	Ericaceae	Ericaceae 1
MAD37	Eira do Serrado	Female	57.78	3.65	Plantae	Streptophyta	Magnoliopsida	Oxalidales	Oxalidaceae	Oxalis sp.3
MAD37	Eira do Serrado	Female	57.78	3.65	Plantae	Streptophyta	Magnoliopsida	Poales	Poaceae	Poaceae 3
MAD37	Eira do Serrado	Female	57.78	3.65	Plantae	Streptophyta	Magnoliopsida	Ranunculales	Papaveraceae	Chelidonium majus
MAD37	Eira do Serrado	Female	57.78	3.65	Plantae	Streptophyta	Magnoliopsida	Rosales	Moraceae	Morus sp.1
MAD37	Eira do Serrado	Female	57.78	3.65	Plantae	Streptophyta	Magnoliopsida	Rosales	Rosaceae	Rosaceae 1
MAD37	Eira do Serrado	Female	57.78	3.65	Plantae	Streptophyta	Magnoliopsida	Solanales	Convolvulaceae	Convolvulaceae 1
MAD37	Eira do Serrado	Female	57.78	3.65	Plantae	Streptophyta	Magnoliopsida	Zingiberales	Musaceae	Musa sp.1
MAD37	Eira do Serrado	Female	57.78	3.65	Plantae	Streptophyta	Pinopsida	Pinales	Pinaceae	Picea sp.1
MAD37	Eira do Serrado	Female	57.78	3.65	Plantae	Streptophyta	Pinopsida	Pinales	Pinaceae	Pinus sp.1
MAD4	Funchal	Male	51.14	3.25	Animalia	Arthropoda	Arachnida	Araneae	Mimetidae	Ero sp.1
MAD4	Funchal	Male	51.14	3.25	Animalia	Arthropoda	Insecta	Psocodea	Ectopsocidae	Ectopsocidae 1
MAD4	Funchal	Male	51.14	3.25	Animalia	Arthropoda	Malacostraca	Isopoda	Armadillidiidae	Armadillidium vulgare
MAD4	Funchal	Male	51.14	3.25	Plantae	Streptophyta	Magnoliopsida	Apiales	Apiaceae	Apiaceae 2
MAD4	Funchal	Male	51.14	3.25	Plantae	Streptophyta	Magnoliopsida	Asparagales	Amaryllidaceae	Allium sp.1
MAD4	Funchal	Male	51.14	3.25	Plantae	Streptophyta	Magnoliopsida	Asterales	Asteraceae	Arctotis venusta
MAD4	Funchal	Male	51.14	3.25	Plantae	Streptophyta	Magnoliopsida	Asterales	Asteraceae	Asteraceae 4
MAD4	Funchal	Male	51.14	3.25	Plantae	Streptophyta	Magnoliopsida	Asterales	Asteraceae	Asteraceae 6
MAD4	Funchal	Male	51.14	3.25	Plantae	Streptophyta	Magnoliopsida	Asterales	Asteraceae	Asteraceae 9
MAD4	Funchal	Male	51.14	3.25	Plantae	Streptophyta	Magnoliopsida	Brassicales	Brassicaceae	Brassica sp.1
MAD4	Funchal	Male	51.14	3.25	Plantae	Streptophyta	Magnoliopsida	Brassicales	Brassicaceae	Brassicaceae 1
MAD4	Funchal	Male	51.14	3.25	Plantae	Streptophyta	Magnoliopsida	Caryophyllales	Caryophyllaceae	Caryophyllaceae 1
MAD4	Funchal	Male	51.14	3.25	Plantae	Streptophyta	Magnoliopsida	Fabales	Fabaceae	Fabaceae 1
MAD4	Funchal	Male	51.14	3.25	Plantae	Streptophyta	Magnoliopsida	Lamiales	Bignoniaceae	Bignoniaceae 1
MAD4	Funchal	Male	51.14	3.25	Plantae	Streptophyta	Magnoliopsida	Magnoliales	Annonaceae	Annonaceae 1
MAD4	Funchal	Male	51.14	3.25	Plantae	Streptophyta	Magnoliopsida	Oxalidales	Oxalidaceae	Oxalis sp.3
MAD4	Funchal	Male	51.14	3.25	Plantae	Streptophyta	Magnoliopsida	Poales	Poaceae	Avena sp.1
MAD4	Funchal	Male	51.14	3.25	Plantae	Streptophyta	Magnoliopsida	Poales	Poaceae	Poaceae 3
MAD4	Funchal	Male	51.14	3.25	Plantae	Streptophyta	Magnoliopsida	Poales	Poaceae	Saccharum sp.1
MAD4	Funchal	Male	51.14	3.25	Plantae	Streptophyta	Magnoliopsida	Ranunculales	Papaveraceae	Fumaria sp.1
MAD4	Funchal	Male	51.14	3.25	Plantae	Streptophyta	Magnoliopsida	Rosales	Urticaceae	Urticaceae 1
MAD4	Funchal	Male	51.14	3.25	Plantae	Streptophyta	Magnoliopsida	Zingiberales	Musaceae	Musa sp.1
MAD4	Funchal	Male	51.14	3.25	Plantae	Streptophyta	Pinopsida	Cupressales	Cupressaceae	Cupressaceae 1
MAD4	Funchal	Male	51.14	3.25	Plantae	Streptophyta	Pinopsida	Pinales	Pinaceae	Pinus sp.1
MAD41	Eira do Serrado	Male	64.67	6.51	Animalia	Arthropoda	Diplopoda	Julida	Julidae	Ommatoiulus moreleti
MAD41	Eira do Serrado	Male	64.67	6.51	Animalia	Arthropoda	Malacostraca	Isopoda	Armadillidiidae	Armadillidium vulgare
MAD41	Eira do Serrado	Male	64.67	6.51	Plantae	Streptophyta	Magnoliopsida	Apiales	Apiaceae	Apiaceae 2
MAD41	Eira do Serrado	Male	64.67	6.51	Plantae	Streptophyta	Magnoliopsida	Asterales	Asteraceae	Arctotis venusta
MAD41	Eira do Serrado	Male	64.67	6.51	Plantae	Streptophyta	Magnoliopsida	Asterales	Asteraceae	Asteraceae 6
MAD41	Eira do Serrado	Male	64.67	6.51	Plantae	Streptophyta	Magnoliopsida	Malpighiales	Euphorbiaceae	Mercurialis annua
MAD41	Eira do Serrado	Male	64.67	6.51	Plantae	Streptophyta	Magnoliopsida	Poales	Poaceae	Poaceae 3
MAD41	Eira do Serrado	Male	64.67	6.51	Plantae	Streptophyta	Magnoliopsida	Rosales	Rosaceae	Rosaceae 1
MAD41	Eira do Serrado	Male	64.67	6.51	Plantae	Streptophyta	Magnoliopsida	Rosales	Rosaceae	Rosaceae 2
MAD41	Eira do Serrado	Male	64.67	6.51	Plantae	Streptophyta	Pinopsida	Pinales	Pinaceae	Pinus sp.1
MAD44	Eira do Serrado	Female	55.16	4.28	Animalia	Arthropoda	Arachnida	Araneae	Mimetidae	Ero sp.1
MAD44	Eira do Serrado	Female	55.16	4.28	Animalia	Arthropoda	Chilopoda	Lithobiomorpha	Lithobiidae	Lithobius lusitanus
MAD44	Eira do Serrado	Female	55.16	4.28	Animalia	Arthropoda	Malacostraca	Isopoda	Armadillidiidae	Armadillidium vulgare
MAD44	Eira do Serrado	Female	55.16	4.28	Animalia	Arthropoda	Malacostraca	Isopoda	Armadillidiidae	Eluma caelatum
MAD44	Eira do Serrado	Female	55.16	4.28	Animalia	Arthropoda	Malacostraca	Isopoda	Porcellionidae	Porcellionides pruinosus
MAD44	Eira do Serrado	Female	55.16	4.28	Animalia	Arthropoda	Malacostraca	Isopoda	Porcellionidae	Porcellionides sexfasciatus
MAD44	Eira do Serrado	Female	55.16	4.28	Animalia	Mollusca	Gastropoda	Stylommatophora	Agriolimacidae	Deroceras panormitanum
MAD44	Eira do Serrado	Female	55.16	4.28	Animalia	Mollusca	Gastropoda	Stylommatophora	Milacidae	Milax gagates
MAD44	Eira do Serrado	Female	55.16	4.28	Plantae	Streptophyta	Magnoliopsida	Asterales	Asteraceae	Arctotis venusta
MAD44	Eira do Serrado	Female	55.16	4.28	Plantae	Streptophyta	Magnoliopsida	Fagales	Juglandaceae	Juglandaceae 1
MAD44	Eira do Serrado	Female	55.16	4.28	Plantae	Streptophyta	Magnoliopsida	Malpighiales	Euphorbiaceae	Euphorbiaceae 3
MAD44	Eira do Serrado	Female	55.16	4.28	Plantae	Streptophyta	Magnoliopsida	Sapindales	Rutaceae	Citrus sp.1
MAD44	Eira do Serrado	Female	55.16	4.28	Plantae	Streptophyta	Magnoliopsida	Saxifragales	Saxifragaceae	Saxifragaceae 1
MAD44	Eira do Serrado	Female	55.16	4.28	Plantae	Streptophyta	Magnoliopsida	Zingiberales	Musaceae	Musa sp.1
MAD44	Eira do Serrado	Female	55.16	4.28	Plantae	Streptophyta	Pinopsida	Pinales	Pinaceae	Pinus sp.1
MAD45	Eira do Serrado	Male	62.3	5.83	Animalia	Arthropoda	Malacostraca	Amphipoda	Talitridae	Talitroides topitotum
MAD45	Eira do Serrado	Male	62.3	5.83	Animalia	Arthropoda	Malacostraca	Isopoda	Armadillidiidae	Eluma caelatum
MAD45	Eira do Serrado	Male	62.3	5.83	Plantae	Streptophyta	Magnoliopsida	Asterales	Asteraceae	Asteraceae 4
MAD45	Eira do Serrado	Male	62.3	5.83	Plantae	Streptophyta	Magnoliopsida	Oxalidales	Oxalidaceae	Oxalis sp.3
MAD45	Eira do Serrado	Male	62.3	5.83	Plantae	Streptophyta	Magnoliopsida	Vitales	Vitaceae	Vitaceae 1
MAD45	Eira do Serrado	Male	62.3	5.83	Plantae	Streptophyta	Magnoliopsida	Zingiberales	Musaceae	Musa sp.1
MAD46	Eira do Serrado	Male	62.49	6.01	Animalia	Arthropoda	Malacostraca	Amphipoda	Talitridae	Talitroides topitotum
MAD46	Eira do Serrado	Male	62.49	6.01	Animalia	Mollusca	Gastropoda	Stylommatophora	Geomitridae	Actinella nitidiuscula
MAD46	Eira do Serrado	Male	62.49	6.01	Plantae	Streptophyta	Magnoliopsida	Apiales	Apiaceae	Apiaceae 2
MAD46	Eira do Serrado	Male	62.49	6.01	Plantae	Streptophyta	Magnoliopsida	Asterales	Asteraceae	Asteraceae 4
MAD46	Eira do Serrado	Male	62.49	6.01	Plantae	Streptophyta	Magnoliopsida	Asterales	Asteraceae	Asteraceae 5
MAD46	Eira do Serrado	Male	62.49	6.01	Plantae	Streptophyta	Magnoliopsida	Asterales	Asteraceae	Asteraceae 6
MAD46	Eira do Serrado	Male	62.49	6.01	Plantae	Streptophyta	Magnoliopsida	Brassicales	Brassicaceae	Brassica sp.1
MAD46	Eira do Serrado	Male	62.49	6.01	Plantae	Streptophyta	Magnoliopsida	Buxales	Buxaceae	Buxus sp.1
MAD46	Eira do Serrado	Male	62.49	6.01	Plantae	Streptophyta	Magnoliopsida	Cornales	Hydrangeaceae	Hydrangea sp.1
MAD46	Eira do Serrado	Male	62.49	6.01	Plantae	Streptophyta	Magnoliopsida	Dipsacales	Caprifoliaceae	Abelia sp.1
MAD46	Eira do Serrado	Male	62.49	6.01	Plantae	Streptophyta	Magnoliopsida	Fabales	Fabaceae	Cicer sp.1
MAD46	Eira do Serrado	Male	62.49	6.01	Plantae	Streptophyta	Magnoliopsida	Fabales	Fabaceae	Fabaceae 4
MAD46	Eira do Serrado	Male	62.49	6.01	Plantae	Streptophyta	Magnoliopsida	Laurales	Lauraceae	Lauraceae 1
MAD46	Eira do Serrado	Male	62.49	6.01	Plantae	Streptophyta	Magnoliopsida	Malpighiales	Salicaceae	Salix sp.1
MAD46	Eira do Serrado	Male	62.49	6.01	Plantae	Streptophyta	Magnoliopsida	Poales	Poaceae	Poaceae 1
MAD46	Eira do Serrado	Male	62.49	6.01	Plantae	Streptophyta	Magnoliopsida	Rosales	Rosaceae	Rosaceae 1
MAD46	Eira do Serrado	Male	62.49	6.01	Plantae	Streptophyta	Magnoliopsida	Rosales	Urticaceae	Parietaria sp.1
MAD46	Eira do Serrado	Male	62.49	6.01	Plantae	Streptophyta	Magnoliopsida	Solanales	Convolvulaceae	Convolvulaceae 1
MAD46	Eira do Serrado	Male	62.49	6.01	Plantae	Streptophyta	Magnoliopsida	Zingiberales	Musaceae	Musa sp.1
MAD46	Eira do Serrado	Male	62.49	6.01	Plantae	Streptophyta	Pinopsida	Pinales	Pinaceae	Pinus sp.1
MAD47	Eira do Serrado	Male	63.4	6.18	Animalia	Arthropoda	Diplopoda	Julida	Blaniulidae	Proteroiulus fuscus
MAD47	Eira do Serrado	Male	63.4	6.18	Animalia	Arthropoda	Diplopoda	Julida	Julidae	Ommatoiulus moreleti
MAD47	Eira do Serrado	Male	63.4	6.18	Animalia	Arthropoda	Malacostraca	Isopoda	Armadillidiidae	Eluma caelatum
MAD47	Eira do Serrado	Male	63.4	6.18	Animalia	Mollusca	Gastropoda	Stylommatophora	Limacidae	Lehmannia nyctelia
MAD47	Eira do Serrado	Male	63.4	6.18	Plantae	Streptophyta	Magnoliopsida	Apiales	Apiaceae	Apiaceae 2
MAD47	Eira do Serrado	Male	63.4	6.18	Plantae	Streptophyta	Magnoliopsida	Asterales	Asteraceae	Arctotis venusta
MAD47	Eira do Serrado	Male	63.4	6.18	Plantae	Streptophyta	Magnoliopsida	Asterales	Asteraceae	Asteraceae 8
MAD47	Eira do Serrado	Male	63.4	6.18	Plantae	Streptophyta	Magnoliopsida	Boraginales	Boraginaceae	Boraginaceae 1
MAD47	Eira do Serrado	Male	63.4	6.18	Plantae	Streptophyta	Magnoliopsida	Caryophyllales	Polygonaceae	Rumex sp.1
MAD47	Eira do Serrado	Male	63.4	6.18	Plantae	Streptophyta	Magnoliopsida	Cornales	Hydrangeaceae	Hydrangea sp.1
MAD47	Eira do Serrado	Male	63.4	6.18	Plantae	Streptophyta	Magnoliopsida	Fagales	Fagaceae	Fagaceae 1
MAD47	Eira do Serrado	Male	63.4	6.18	Plantae	Streptophyta	Magnoliopsida	Rosales	Rosaceae	Prunus sp.1
MAD47	Eira do Serrado	Male	63.4	6.18	Plantae	Streptophyta	Magnoliopsida	Sapindales	Rutaceae	Citrus sp.1
MAD47	Eira do Serrado	Male	63.4	6.18	Plantae	Streptophyta	Magnoliopsida	Saxifragales	Saxifragaceae	Saxifragaceae 1
MAD47	Eira do Serrado	Male	63.4	6.18	Plantae	Streptophyta	Magnoliopsida	Zingiberales	Musaceae	Musa sp.1
MAD47	Eira do Serrado	Male	63.4	6.18	Plantae	Streptophyta	Pinopsida	Pinales	Pinaceae	Pinus sp.1
MAD5	Funchal	Male	67.66	7.39	Animalia	Arthropoda	Malacostraca	Isopoda	Porcellionidae	Porcellionides sexfasciatus
MAD5	Funchal	Male	67.66	7.39	Animalia	Mollusca	Gastropoda	Stylommatophora	Agriolimacidae	Deroceras panormitanum
MAD5	Funchal	Male	67.66	7.39	Plantae	Streptophyta	Magnoliopsida	Caryophyllales	Caryophyllaceae	Cerastium sp.1
MAD5	Funchal	Male	67.66	7.39	Plantae	Streptophyta	Magnoliopsida	Oxalidales	Oxalidaceae	Oxalis sp.3
MAD5	Funchal	Male	67.66	7.39	Plantae	Streptophyta	Magnoliopsida	Poales	Poaceae	Poaceae 1
MAD5	Funchal	Male	67.66	7.39	Plantae	Streptophyta	Magnoliopsida	Zingiberales	Musaceae	Musa sp.1
MAD50	Eira do Serrado	Male	64.96	7.24	Animalia	Arthropoda	Insecta	Blattodea	Blattidae	Periplaneta americana
MAD50	Eira do Serrado	Male	64.96	7.24	Animalia	Arthropoda	Malacostraca	Isopoda	Oniscidae	Oniscus asellus
MAD50	Eira do Serrado	Male	64.96	7.24	Plantae	Streptophyta	Magnoliopsida	Asterales	Asteraceae	Asteraceae 4
MAD50	Eira do Serrado	Male	64.96	7.24	Plantae	Streptophyta	Magnoliopsida	Buxales	Buxaceae	Buxus sp.1
MAD50	Eira do Serrado	Male	64.96	7.24	Plantae	Streptophyta	Magnoliopsida	Fabales	Fabaceae	Pisum sp.1
MAD50	Eira do Serrado	Male	64.96	7.24	Plantae	Streptophyta	Magnoliopsida	Lamiales	Lamiaceae	Lamiaceae 1
MAD50	Eira do Serrado	Male	64.96	7.24	Plantae	Streptophyta	Magnoliopsida	Malvales	Malvaceae	Theobroma sp.1
MAD50	Eira do Serrado	Male	64.96	7.24	Plantae	Streptophyta	Magnoliopsida	Oxalidales	Oxalidaceae	Oxalis sp.3
MAD50	Eira do Serrado	Male	64.96	7.24	Plantae	Streptophyta	Magnoliopsida	Poales	Poaceae	Poaceae 3
MAD50	Eira do Serrado	Male	64.96	7.24	Plantae	Streptophyta	Magnoliopsida	Rosales	Rosaceae	Rosaceae 1
MAD50	Eira do Serrado	Male	64.96	7.24	Plantae	Streptophyta	Magnoliopsida	Rosales	Urticaceae	Parietaria sp.1
MAD50	Eira do Serrado	Male	64.96	7.24	Plantae	Streptophyta	Magnoliopsida	Sapindales	Rutaceae	Citrus sp.1
MAD50	Eira do Serrado	Male	64.96	7.24	Plantae	Streptophyta	Magnoliopsida	Solanales	Convolvulaceae	Ipomoea sp.1
MAD50	Eira do Serrado	Male	64.96	7.24	Plantae	Streptophyta	Magnoliopsida	Zingiberales	Musaceae	Musa sp.1
MAD50	Eira do Serrado	Male	64.96	7.24	Plantae	Streptophyta	Pinopsida	Cupressales	Cupressaceae	Cupressaceae 1
MAD50	Eira do Serrado	Male	64.96	7.24	Plantae	Streptophyta	Pinopsida	Pinales	Pinaceae	Pinus sp.1
MAD51	Eira do Serrado	Female	48.86	2.42	Animalia	Arthropoda	Arachnida	Araneae	Salticidae	Salticidae 1
MAD51	Eira do Serrado	Female	48.86	2.42	Animalia	Arthropoda	Malacostraca	Isopoda	Armadillidiidae	Armadillidium vulgare
MAD51	Eira do Serrado	Female	48.86	2.42	Animalia	Arthropoda	Malacostraca	Isopoda	Oniscidae	Oniscus asellus
MAD51	Eira do Serrado	Female	48.86	2.42	Plantae	Streptophyta	Magnoliopsida	Apiales	Apiaceae	Apiaceae 2
MAD51	Eira do Serrado	Female	48.86	2.42	Plantae	Streptophyta	Magnoliopsida	Asterales	Asteraceae	Arctotis venusta
MAD51	Eira do Serrado	Female	48.86	2.42	Plantae	Streptophyta	Magnoliopsida	Brassicales	Brassicaceae	Brassica sp.1
MAD51	Eira do Serrado	Female	48.86	2.42	Plantae	Streptophyta	Magnoliopsida	Oxalidales	Oxalidaceae	Oxalis sp.3
MAD51	Eira do Serrado	Female	48.86	2.42	Plantae	Streptophyta	Pinopsida	Pinales	Pinaceae	Pinus sp.1
MAD52	Eira do Serrado	Female	60.31	4.7	Animalia	Arthropoda	Diplopoda	Julida	Julidae	Ommatoiulus moreleti
MAD52	Eira do Serrado	Female	60.31	4.7	Animalia	Arthropoda	Malacostraca	Isopoda	Armadillidiidae	Armadillidium vulgare
MAD52	Eira do Serrado	Female	60.31	4.7	Plantae	Streptophyta	Magnoliopsida	Apiales	Apiaceae	Apiaceae 2
MAD52	Eira do Serrado	Female	60.31	4.7	Plantae	Streptophyta	Magnoliopsida	Apiales	Araliaceae	Araliaceae 1
MAD52	Eira do Serrado	Female	60.31	4.7	Plantae	Streptophyta	Magnoliopsida	Asterales	Asteraceae	Arctotis venusta
MAD52	Eira do Serrado	Female	60.31	4.7	Plantae	Streptophyta	Magnoliopsida	Asterales	Asteraceae	Asteraceae 3
MAD52	Eira do Serrado	Female	60.31	4.7	Plantae	Streptophyta	Magnoliopsida	Asterales	Asteraceae	Asteraceae 5
MAD52	Eira do Serrado	Female	60.31	4.7	Plantae	Streptophyta	Magnoliopsida	Asterales	Asteraceae	Asteraceae 6
MAD52	Eira do Serrado	Female	60.31	4.7	Plantae	Streptophyta	Magnoliopsida	Boraginales	Boraginaceae	Boraginaceae 1
MAD52	Eira do Serrado	Female	60.31	4.7	Plantae	Streptophyta	Magnoliopsida	Brassicales	Tropaeolaceae	Tropaeolaceae 11
MAD52	Eira do Serrado	Female	60.31	4.7	Plantae	Streptophyta	Magnoliopsida	Brassicales	Tropaeolaceae	Tropaeolaceae 9
MAD52	Eira do Serrado	Female	60.31	4.7	Plantae	Streptophyta	Magnoliopsida	Caryophyllales	Caryophyllaceae	Cerastium sp.1
MAD52	Eira do Serrado	Female	60.31	4.7	Plantae	Streptophyta	Magnoliopsida	Caryophyllales	Nyctaginaceae	Bougainvillea sp.1
MAD52	Eira do Serrado	Female	60.31	4.7	Plantae	Streptophyta	Magnoliopsida	Fabales	Fabaceae	Pisum sp.1
MAD52	Eira do Serrado	Female	60.31	4.7	Plantae	Streptophyta	Magnoliopsida	Malpighiales	Salicaceae	Populus sp.1
MAD52	Eira do Serrado	Female	60.31	4.7	Plantae	Streptophyta	Magnoliopsida	Oxalidales	Oxalidaceae	Oxalis sp.3
MAD52	Eira do Serrado	Female	60.31	4.7	Plantae	Streptophyta	Magnoliopsida	Poales	Poaceae	Bromus sp.2
MAD52	Eira do Serrado	Female	60.31	4.7	Plantae	Streptophyta	Magnoliopsida	Poales	Poaceae	Poaceae 1
MAD52	Eira do Serrado	Female	60.31	4.7	Plantae	Streptophyta	Magnoliopsida	Poales	Poaceae	Poaceae 3
MAD52	Eira do Serrado	Female	60.31	4.7	Plantae	Streptophyta	Magnoliopsida	Sapindales	Anacardiaceae	Anacardium sp.1
MAD52	Eira do Serrado	Female	60.31	4.7	Plantae	Streptophyta	Magnoliopsida	Sapindales	Rutaceae	Citrus sp.1
MAD52	Eira do Serrado	Female	60.31	4.7	Plantae	Streptophyta	Magnoliopsida	Solanales	Convolvulaceae	Convolvulaceae 1
MAD52	Eira do Serrado	Female	60.31	4.7	Plantae	Streptophyta	Magnoliopsida	Solanales	Solanaceae	Solanaceae 4
MAD52	Eira do Serrado	Female	60.31	4.7	Plantae	Streptophyta	Magnoliopsida	Solanales	Solanaceae	Solanum sp.1
MAD52	Eira do Serrado	Female	60.31	4.7	Plantae	Streptophyta	Magnoliopsida	Zingiberales	Musaceae	Musa sp.1
MAD52	Eira do Serrado	Female	60.31	4.7	Plantae	Streptophyta	Pinopsida	Pinales	Pinaceae	Picea sp.1
MAD52	Eira do Serrado	Female	60.31	4.7	Plantae	Streptophyta	Pinopsida	Pinales	Pinaceae	Pinus sp.1
MAD54	Eira do Serrado	Male	59.8	6.05	Animalia	Arthropoda	Chilopoda	Lithobiomorpha	Lithobiidae	Lithobius lusitanus
MAD54	Eira do Serrado	Male	59.8	6.05	Animalia	Arthropoda	Diplopoda	Polydesmida	Polydesmidae	Polydesmus coriaceus
MAD54	Eira do Serrado	Male	59.8	6.05	Animalia	Arthropoda	Malacostraca	Isopoda	Armadillidiidae	Armadillidium vulgare
MAD54	Eira do Serrado	Male	59.8	6.05	Plantae	Streptophyta	Magnoliopsida	Asterales	Asteraceae	Asteraceae 8
MAD54	Eira do Serrado	Male	59.8	6.05	Plantae	Streptophyta	Magnoliopsida	Caryophyllales	Tamaricaceae	Tamarix sp.1
MAD54	Eira do Serrado	Male	59.8	6.05	Plantae	Streptophyta	Magnoliopsida	Oxalidales	Oxalidaceae	Oxalis sp.3
MAD54	Eira do Serrado	Male	59.8	6.05	Plantae	Streptophyta	Magnoliopsida	Saxifragales	Saxifragaceae	Saxifragaceae 1
MAD54	Eira do Serrado	Male	59.8	6.05	Plantae	Streptophyta	Magnoliopsida	Solanales	Convolvulaceae	Convolvulaceae 1
MAD54	Eira do Serrado	Male	59.8	6.05	Plantae	Streptophyta	Magnoliopsida	Solanales	Convolvulaceae	Ipomoea sp.1
MAD54	Eira do Serrado	Male	59.8	6.05	Plantae	Streptophyta	Magnoliopsida	Zingiberales	Musaceae	Musa sp.1
MAD54	Eira do Serrado	Male	59.8	6.05	Plantae	Streptophyta	Pinopsida	Pinales	Pinaceae	Pinus sp.1
MAD56	Eira do Serrado	Female	56.75	3.58	Animalia	Arthropoda	Malacostraca	Isopoda	Armadillidiidae	Armadillidium vulgare
MAD56	Eira do Serrado	Female	56.75	3.58	Plantae	Streptophyta	Magnoliopsida	Caryophyllales	Polygonaceae	Rumex sp.1
MAD56	Eira do Serrado	Female	56.75	3.58	Plantae	Streptophyta	Magnoliopsida	Saxifragales	Saxifragaceae	Saxifragaceae 1
MAD56	Eira do Serrado	Female	56.75	3.58	Plantae	Streptophyta	Magnoliopsida	Zingiberales	Musaceae	Musa sp.1
MAD57	Eira do Serrado	Female	52.47	3	Animalia	Arthropoda	Arachnida	Araneae	Mimetidae	Ero sp.1
MAD57	Eira do Serrado	Female	52.47	3	Animalia	Arthropoda	Insecta	Diptera	Calliphoridae	Hemigymnochaeta unicolor
MAD57	Eira do Serrado	Female	52.47	3	Plantae	Streptophyta	Magnoliopsida	Asterales	Asteraceae	Asteraceae 4
MAD57	Eira do Serrado	Female	52.47	3	Plantae	Streptophyta	Magnoliopsida	Asterales	Asteraceae	Asteraceae 6
MAD57	Eira do Serrado	Female	52.47	3	Plantae	Streptophyta	Magnoliopsida	Brassicales	Brassicaceae	Brassica sp.1
MAD57	Eira do Serrado	Female	52.47	3	Plantae	Streptophyta	Magnoliopsida	Caryophyllales	Caryophyllaceae	Caryophyllaceae 1
MAD57	Eira do Serrado	Female	52.47	3	Plantae	Streptophyta	Magnoliopsida	Fabales	Fabaceae	Fabaceae 3
MAD57	Eira do Serrado	Female	52.47	3	Plantae	Streptophyta	Magnoliopsida	Fagales	Fagaceae	Fagaceae 1
MAD57	Eira do Serrado	Female	52.47	3	Plantae	Streptophyta	Magnoliopsida	Oxalidales	Oxalidaceae	Oxalis sp.3
MAD57	Eira do Serrado	Female	52.47	3	Plantae	Streptophyta	Magnoliopsida	Poales	Poaceae	Poaceae 3
MAD57	Eira do Serrado	Female	52.47	3	Plantae	Streptophyta	Magnoliopsida	Rosales	Rosaceae	Rosaceae 2
MAD57	Eira do Serrado	Female	52.47	3	Plantae	Streptophyta	Magnoliopsida	Rosales	Ulmaceae	Ulmaceae 1
MAD57	Eira do Serrado	Female	52.47	3	Plantae	Streptophyta	Magnoliopsida	Sapindales	Rutaceae	Citrus sp.1
MAD57	Eira do Serrado	Female	52.47	3	Plantae	Streptophyta	Magnoliopsida	Solanales	Solanaceae	Solanaceae 2
MAD57	Eira do Serrado	Female	52.47	3	Plantae	Streptophyta	Magnoliopsida	Zingiberales	Musaceae	Musa sp.1
MAD58	Eira do Serrado	Male	56.19	3.34	Animalia	Arthropoda	Arachnida	Araneae	Clubionidae	Porrhoclubiona sp.1
MAD58	Eira do Serrado	Male	56.19	3.34	Animalia	Arthropoda	Malacostraca	Isopoda	Armadillidiidae	Armadillidium vulgare
MAD58	Eira do Serrado	Male	56.19	3.34	Animalia	Arthropoda	Malacostraca	Isopoda	Armadillidiidae	Eluma caelatum
MAD58	Eira do Serrado	Male	56.19	3.34	Plantae	Streptophyta	Magnoliopsida	Apiales	Apiaceae	Apiaceae 2
MAD58	Eira do Serrado	Male	56.19	3.34	Plantae	Streptophyta	Magnoliopsida	Asterales	Asteraceae	Arctotis venusta
MAD58	Eira do Serrado	Male	56.19	3.34	Plantae	Streptophyta	Magnoliopsida	Dipsacales	Caprifoliaceae	Abelia sp.1
MAD58	Eira do Serrado	Male	56.19	3.34	Plantae	Streptophyta	Magnoliopsida	Fabales	Fabaceae	Arachis sp.1
MAD58	Eira do Serrado	Male	56.19	3.34	Plantae	Streptophyta	Magnoliopsida	Oxalidales	Oxalidaceae	Oxalis sp.3
MAD58	Eira do Serrado	Male	56.19	3.34	Plantae	Streptophyta	Magnoliopsida	Poales	Poaceae	Poaceae 1
MAD58	Eira do Serrado	Male	56.19	3.34	Plantae	Streptophyta	Magnoliopsida	Poales	Poaceae	Poaceae 3
MAD58	Eira do Serrado	Male	56.19	3.34	Plantae	Streptophyta	Magnoliopsida	Rosales	Rosaceae	Rosaceae 1
MAD58	Eira do Serrado	Male	56.19	3.34	Plantae	Streptophyta	Magnoliopsida	Rosales	Rosaceae	Rosaceae 2
MAD58	Eira do Serrado	Male	56.19	3.34	Plantae	Streptophyta	Magnoliopsida	Sapindales	Rutaceae	Citrus sp.1
MAD58	Eira do Serrado	Male	56.19	3.34	Plantae	Streptophyta	Magnoliopsida	Zingiberales	Musaceae	Musa sp.1
MAD58	Eira do Serrado	Male	56.19	3.34	Plantae	Streptophyta	Pinopsida	Pinales	Pinaceae	Pinus sp.1
MAD6	Funchal	Female	53.53	3.46	Animalia	Arthropoda	Malacostraca	Isopoda	Porcellionidae	Porcellionides sexfasciatus
MAD6	Funchal	Female	53.53	3.46	Plantae	Streptophyta	Magnoliopsida	Apiales	Apiaceae	Apiaceae 2
MAD6	Funchal	Female	53.53	3.46	Plantae	Streptophyta	Magnoliopsida	Caryophyllales	Chenopodiaceae	Beta sp.1
MAD6	Funchal	Female	53.53	3.46	Plantae	Streptophyta	Magnoliopsida	Fabales	Fabaceae	Pisum sp.1
MAD6	Funchal	Female	53.53	3.46	Plantae	Streptophyta	Magnoliopsida	Fagales	Fagaceae	Quercus sp.1
MAD6	Funchal	Female	53.53	3.46	Plantae	Streptophyta	Magnoliopsida	Poales	Poaceae	Hordeum sp.1
MAD6	Funchal	Female	53.53	3.46	Plantae	Streptophyta	Magnoliopsida	Poales	Poaceae	Poaceae 1
MAD6	Funchal	Female	53.53	3.46	Plantae	Streptophyta	Magnoliopsida	Poales	Poaceae	Poaceae 3
MAD6	Funchal	Female	53.53	3.46	Plantae	Streptophyta	Magnoliopsida	Rosales	Urticaceae	Urticaceae 1
MAD6	Funchal	Female	53.53	3.46	Plantae	Streptophyta	Magnoliopsida	Sapindales	Rutaceae	Citrus sp.1
MAD6	Funchal	Female	53.53	3.46	Plantae	Streptophyta	Magnoliopsida	Zingiberales	Musaceae	Musa sp.1
MAD60	Eira do Serrado	Male	60.82	5.66	Animalia	Arthropoda	Diplopoda	Julida	Julidae	Ommatoiulus moreleti
MAD60	Eira do Serrado	Male	60.82	5.66	Animalia	Mollusca	Gastropoda	Stylommatophora	Geomitridae	Actinella nitidiuscula
MAD60	Eira do Serrado	Male	60.82	5.66	Plantae	Streptophyta	Magnoliopsida	Asterales	Asteraceae	Arctotis venusta
MAD60	Eira do Serrado	Male	60.82	5.66	Plantae	Streptophyta	Magnoliopsida	Asterales	Asteraceae	Asteraceae 4
MAD60	Eira do Serrado	Male	60.82	5.66	Plantae	Streptophyta	Magnoliopsida	Asterales	Asteraceae	Asteraceae 8
MAD60	Eira do Serrado	Male	60.82	5.66	Plantae	Streptophyta	Magnoliopsida	Boraginales	Boraginaceae	Boraginaceae 1
MAD60	Eira do Serrado	Male	60.82	5.66	Plantae	Streptophyta	Magnoliopsida	Caryophyllales	Amaranthaceae	Achyranthes aspera
MAD60	Eira do Serrado	Male	60.82	5.66	Plantae	Streptophyta	Magnoliopsida	Fabales	Fabaceae	Bituminaria sp.1
MAD60	Eira do Serrado	Male	60.82	5.66	Plantae	Streptophyta	Magnoliopsida	Fabales	Fabaceae	Lotus sp.1
MAD60	Eira do Serrado	Male	60.82	5.66	Plantae	Streptophyta	Magnoliopsida	Laurales	Lauraceae	Lauraceae 1
MAD60	Eira do Serrado	Male	60.82	5.66	Plantae	Streptophyta	Magnoliopsida	Malpighiales	Salicaceae	Populus sp.1
MAD60	Eira do Serrado	Male	60.82	5.66	Plantae	Streptophyta	Magnoliopsida	Poales	Poaceae	Bromus sp.2
MAD60	Eira do Serrado	Male	60.82	5.66	Plantae	Streptophyta	Magnoliopsida	Poales	Poaceae	Poaceae 3
MAD60	Eira do Serrado	Male	60.82	5.66	Plantae	Streptophyta	Magnoliopsida	Rosales	Rosaceae	Rosaceae 1
MAD60	Eira do Serrado	Male	60.82	5.66	Plantae	Streptophyta	Magnoliopsida	Solanales	Solanaceae	Solanaceae 2
MAD60	Eira do Serrado	Male	60.82	5.66	Plantae	Streptophyta	Magnoliopsida	Zingiberales	Musaceae	Musa sp.1
MAD61	Eira do Serrado	Female	50.77	2.41	Animalia	Arthropoda	Malacostraca	Isopoda	Armadillidiidae	Eluma caelatum
MAD61	Eira do Serrado	Female	50.77	2.41	Animalia	Mollusca	Gastropoda	Stylommatophora	Agriolimacidae	Deroceras panormitanum
MAD61	Eira do Serrado	Female	50.77	2.41	Plantae	Streptophyta	Magnoliopsida	Asterales	Asteraceae	Arctotis venusta
MAD61	Eira do Serrado	Female	50.77	2.41	Plantae	Streptophyta	Magnoliopsida	Asterales	Asteraceae	Asteraceae 6
MAD61	Eira do Serrado	Female	50.77	2.41	Plantae	Streptophyta	Magnoliopsida	Asterales	Asteraceae	Asteraceae 7
MAD61	Eira do Serrado	Female	50.77	2.41	Plantae	Streptophyta	Magnoliopsida	Ericales	Actinidiaceae	Actinidia sp.1
MAD61	Eira do Serrado	Female	50.77	2.41	Plantae	Streptophyta	Magnoliopsida	Fabales	Fabaceae	Fabaceae 2
MAD61	Eira do Serrado	Female	50.77	2.41	Plantae	Streptophyta	Magnoliopsida	Oxalidales	Oxalidaceae	Oxalis sp.3
MAD61	Eira do Serrado	Female	50.77	2.41	Plantae	Streptophyta	Magnoliopsida	Poales	Poaceae	Holcus sp.1
MAD61	Eira do Serrado	Female	50.77	2.41	Plantae	Streptophyta	Magnoliopsida	Rosales	Rosaceae	Rosaceae 1
MAD61	Eira do Serrado	Female	50.77	2.41	Plantae	Streptophyta	Pinopsida	Pinales	Pinaceae	Pinus sp.1
MAD64	Eira do Serrado	Female	50.56	2.98	Animalia	Arthropoda	Chilopoda	Lithobiomorpha	Lithobiidae	Lithobius lusitanus
MAD64	Eira do Serrado	Female	50.56	2.98	Animalia	Arthropoda	Malacostraca	Isopoda	Armadillidiidae	Eluma caelatum
MAD64	Eira do Serrado	Female	50.56	2.98	Plantae	Streptophyta	Magnoliopsida	Asterales	Asteraceae	Arctotis venusta
MAD64	Eira do Serrado	Female	50.56	2.98	Plantae	Streptophyta	Magnoliopsida	Asterales	Asteraceae	Asteraceae 4
MAD64	Eira do Serrado	Female	50.56	2.98	Plantae	Streptophyta	Magnoliopsida	Asterales	Asteraceae	Asteraceae 6
MAD64	Eira do Serrado	Female	50.56	2.98	Plantae	Streptophyta	Magnoliopsida	Asterales	Asteraceae	Asteraceae 8
MAD64	Eira do Serrado	Female	50.56	2.98	Plantae	Streptophyta	Magnoliopsida	Caryophyllales	Amaranthaceae	Achyranthes aspera
MAD64	Eira do Serrado	Female	50.56	2.98	Plantae	Streptophyta	Magnoliopsida	Fabales	Fabaceae	Pisum sp.1
MAD64	Eira do Serrado	Female	50.56	2.98	Plantae	Streptophyta	Magnoliopsida	Fagales	Fagaceae	Quercus sp.1
MAD64	Eira do Serrado	Female	50.56	2.98	Plantae	Streptophyta	Magnoliopsida	Lamiales	Oleaceae	Oleaceae 1
MAD64	Eira do Serrado	Female	50.56	2.98	Plantae	Streptophyta	Magnoliopsida	Laurales	Lauraceae	Lauraceae 1
MAD64	Eira do Serrado	Female	50.56	2.98	Plantae	Streptophyta	Magnoliopsida	Malvales	Malvaceae	Malvaceae 2
MAD64	Eira do Serrado	Female	50.56	2.98	Plantae	Streptophyta	Magnoliopsida	Poales	Poaceae	Poaceae 3
MAD64	Eira do Serrado	Female	50.56	2.98	Plantae	Streptophyta	Magnoliopsida	Rosales	Urticaceae	Urticaceae 1
MAD64	Eira do Serrado	Female	50.56	2.98	Plantae	Streptophyta	Magnoliopsida	Sapindales	Rutaceae	Citrus sp.1
MAD64	Eira do Serrado	Female	50.56	2.98	Plantae	Streptophyta	Magnoliopsida	Solanales	Solanaceae	Solanum sp.1
MAD64	Eira do Serrado	Female	50.56	2.98	Plantae	Streptophyta	Magnoliopsida	Solanales	Solanaceae	Solanum sp.2
MAD64	Eira do Serrado	Female	50.56	2.98	Plantae	Streptophyta	Magnoliopsida	Zingiberales	Musaceae	Musa sp.1
MAD64	Eira do Serrado	Female	50.56	2.98	Plantae	Streptophyta	Pinopsida	Pinales	Pinaceae	Pinus sp.1
MAD65	Eira do Serrado	Female	51.47	2.66	Animalia	Arthropoda	Arachnida	Araneae	Pholcidae	Holocnemus pluchei
MAD65	Eira do Serrado	Female	51.47	2.66	Animalia	Arthropoda	Arachnida	Araneae	Salticidae	Salticus sp.1
MAD65	Eira do Serrado	Female	51.47	2.66	Animalia	Arthropoda	Diplopoda	Julida	Julidae	Ommatoiulus moreleti
MAD65	Eira do Serrado	Female	51.47	2.66	Animalia	Arthropoda	Malacostraca	Isopoda	Armadillidiidae	Armadillidium vulgare
MAD65	Eira do Serrado	Female	51.47	2.66	Animalia	Chordata	Reptilia	Squamata	Phyllodactylidae	Tarentola mauritanica
MAD65	Eira do Serrado	Female	51.47	2.66	Plantae	Streptophyta	Magnoliopsida	Apiales	Apiaceae	Apiaceae 2
MAD65	Eira do Serrado	Female	51.47	2.66	Plantae	Streptophyta	Magnoliopsida	Boraginales	Boraginaceae	Boraginaceae 1
MAD65	Eira do Serrado	Female	51.47	2.66	Plantae	Streptophyta	Magnoliopsida	Caryophyllales	Caryophyllaceae	Cerastium sp.1
MAD65	Eira do Serrado	Female	51.47	2.66	Plantae	Streptophyta	Magnoliopsida	Caryophyllales	Tamaricaceae	Tamarix sp.1
MAD65	Eira do Serrado	Female	51.47	2.66	Plantae	Streptophyta	Magnoliopsida	Fagales	Juglandaceae	Juglandaceae 1
MAD65	Eira do Serrado	Female	51.47	2.66	Plantae	Streptophyta	Magnoliopsida	Oxalidales	Oxalidaceae	Oxalis sp.3
MAD65	Eira do Serrado	Female	51.47	2.66	Plantae	Streptophyta	Magnoliopsida	Poales	Poaceae	Brachypodium sp.1
MAD65	Eira do Serrado	Female	51.47	2.66	Plantae	Streptophyta	Magnoliopsida	Rosales	Rosaceae	Rosaceae 1
MAD65	Eira do Serrado	Female	51.47	2.66	Plantae	Streptophyta	Magnoliopsida	Rosales	Urticaceae	Urticaceae 1
MAD65	Eira do Serrado	Female	51.47	2.66	Plantae	Streptophyta	Magnoliopsida	Sapindales	Rutaceae	Citrus sp.1
MAD65	Eira do Serrado	Female	51.47	2.66	Plantae	Streptophyta	Magnoliopsida	Solanales	Solanaceae	Solanum sp.2
MAD65	Eira do Serrado	Female	51.47	2.66	Plantae	Streptophyta	Magnoliopsida	Zingiberales	Musaceae	Musa sp.1
MAD7	Funchal	Male	63.06	5.7	Animalia	Arthropoda	Malacostraca	Isopoda	Armadillidiidae	Armadillidium vulgare
MAD7	Funchal	Male	63.06	5.7	Animalia	Arthropoda	Malacostraca	Isopoda	Porcellionidae	Porcellionides sexfasciatus
MAD7	Funchal	Male	63.06	5.7	Animalia	Mollusca	Gastropoda	Stylommatophora	Agriolimacidae	Deroceras panormitanum
MAD7	Funchal	Male	63.06	5.7	Plantae	Streptophyta	Magnoliopsida	Asterales	Asteraceae	Arctotis venusta
MAD7	Funchal	Male	63.06	5.7	Plantae	Streptophyta	Magnoliopsida	Caryophyllales	Chenopodiaceae	Beta sp.1
MAD7	Funchal	Male	63.06	5.7	Plantae	Streptophyta	Magnoliopsida	Gentianales	Apocynaceae	Apocynaceae 1
MAD7	Funchal	Male	63.06	5.7	Plantae	Streptophyta	Magnoliopsida	Malpighiales	Euphorbiaceae	Euphorbia sp.1
MAD7	Funchal	Male	63.06	5.7	Plantae	Streptophyta	Magnoliopsida	Malpighiales	Euphorbiaceae	Euphorbiaceae 1
MAD7	Funchal	Male	63.06	5.7	Plantae	Streptophyta	Magnoliopsida	Myrtales	Myrtaceae	Myrtaceae 1
MAD7	Funchal	Male	63.06	5.7	Plantae	Streptophyta	Magnoliopsida	Oxalidales	Oxalidaceae	Oxalis sp.3
MAD7	Funchal	Male	63.06	5.7	Plantae	Streptophyta	Magnoliopsida	Poales	Poaceae	Poaceae 3
MAD7	Funchal	Male	63.06	5.7	Plantae	Streptophyta	Magnoliopsida	Rosales	Urticaceae	Urticaceae 1
MAD7	Funchal	Male	63.06	5.7	Plantae	Streptophyta	Magnoliopsida	Sapindales	Rutaceae	Citrus sp.1
MAD7	Funchal	Male	63.06	5.7	Plantae	Streptophyta	Magnoliopsida	Solanales	Convolvulaceae	Ipomoea sp.1
MAD7	Funchal	Male	63.06	5.7	Plantae	Streptophyta	Magnoliopsida	Zingiberales	Musaceae	Musa sp.1
MAD70	Ponta de São Lorenço	Female	56.32	3.56	Animalia	Arthropoda	Insecta	Hymenoptera	Formicidae	Monomorium subopacum
MAD70	Ponta de São Lorenço	Female	56.32	3.56	Animalia	Arthropoda	Malacostraca	Isopoda	Armadillidiidae	Armadillidium vulgare
MAD70	Ponta de São Lorenço	Female	56.32	3.56	Plantae	Streptophyta	Magnoliopsida	Asterales	Asteraceae	Asteraceae 3
MAD70	Ponta de São Lorenço	Female	56.32	3.56	Plantae	Streptophyta	Magnoliopsida	Asterales	Asteraceae	Asteraceae 4
MAD70	Ponta de São Lorenço	Female	56.32	3.56	Plantae	Streptophyta	Magnoliopsida	Asterales	Asteraceae	Asteraceae 5
MAD70	Ponta de São Lorenço	Female	56.32	3.56	Plantae	Streptophyta	Magnoliopsida	Asterales	Asteraceae	Asteraceae 8
MAD70	Ponta de São Lorenço	Female	56.32	3.56	Plantae	Streptophyta	Magnoliopsida	Caryophyllales	Tamaricaceae	Tamarix sp.1
MAD70	Ponta de São Lorenço	Female	56.32	3.56	Plantae	Streptophyta	Magnoliopsida	Fabales	Fabaceae	Bituminaria sp.1
MAD70	Ponta de São Lorenço	Female	56.32	3.56	Plantae	Streptophyta	Magnoliopsida	Lamiales	Plantaginaceae	Veronica sp.2
MAD70	Ponta de São Lorenço	Female	56.32	3.56	Plantae	Streptophyta	Magnoliopsida	Poales	Poaceae	Poaceae 3
MAD70	Ponta de São Lorenço	Female	56.32	3.56	Plantae	Streptophyta	Magnoliopsida	Sapindales	Rutaceae	Citrus sp.1
MAD70	Ponta de São Lorenço	Female	56.32	3.56	Plantae	Streptophyta	Magnoliopsida	Solanales	Solanaceae	Solanaceae 2
MAD70	Ponta de São Lorenço	Female	56.32	3.56	Plantae	Streptophyta	Magnoliopsida	Solanales	Solanaceae	Solanum sp.2
MAD70	Ponta de São Lorenço	Female	56.32	3.56	Plantae	Streptophyta	Magnoliopsida	Zingiberales	Musaceae	Musa sp.1
MAD70	Ponta de São Lorenço	Female	56.32	3.56	Plantae	Streptophyta	Pinopsida	Pinales	Pinaceae	Pinus sp.1
MAD71	Ponta de São Lorenço	Female	58.13	4.64	Animalia	Arthropoda	Insecta	Orthoptera	Tettigoniidae	Decticus albifrons
MAD71	Ponta de São Lorenço	Female	58.13	4.64	Animalia	Arthropoda	Malacostraca	Isopoda	Armadillidiidae	Armadillidium vulgare
MAD71	Ponta de São Lorenço	Female	58.13	4.64	Plantae	Streptophyta	Magnoliopsida	Asterales	Asteraceae	Asteraceae 5
MAD71	Ponta de São Lorenço	Female	58.13	4.64	Plantae	Streptophyta	Magnoliopsida	Caryophyllales	Caryophyllaceae	Silene sp.2
MAD71	Ponta de São Lorenço	Female	58.13	4.64	Plantae	Streptophyta	Magnoliopsida	Fabales	Fabaceae	Bituminaria sp.1
MAD71	Ponta de São Lorenço	Female	58.13	4.64	Plantae	Streptophyta	Magnoliopsida	Fabales	Fabaceae	Lotus sp.1
MAD72	Ponta de São Lorenço	Male	57.82	4.9	Animalia	Arthropoda	Insecta	Hemiptera	Aphididae	Hyperomyzus lactucae
MAD72	Ponta de São Lorenço	Male	57.82	4.9	Animalia	Arthropoda	Malacostraca	Isopoda	Armadillidiidae	Armadillidium vulgare
MAD72	Ponta de São Lorenço	Male	57.82	4.9	Plantae	Streptophyta	Magnoliopsida	Asterales	Asteraceae	Asteraceae 4
MAD72	Ponta de São Lorenço	Male	57.82	4.9	Plantae	Streptophyta	Magnoliopsida	Asterales	Asteraceae	Asteraceae 5
MAD72	Ponta de São Lorenço	Male	57.82	4.9	Plantae	Streptophyta	Magnoliopsida	Fabales	Fabaceae	Bituminaria sp.1
MAD72	Ponta de São Lorenço	Male	57.82	4.9	Plantae	Streptophyta	Magnoliopsida	Fabales	Fabaceae	Prosopis sp.1
MAD72	Ponta de São Lorenço	Male	57.82	4.9	Plantae	Streptophyta	Magnoliopsida	Poales	Poaceae	Brachypodium sp.1
MAD72	Ponta de São Lorenço	Male	57.82	4.9	Plantae	Streptophyta	Magnoliopsida	Poales	Poaceae	Poaceae 3
MAD72	Ponta de São Lorenço	Male	57.82	4.9	Plantae	Streptophyta	Magnoliopsida	Solanales	Convolvulaceae	Convolvulaceae 1
MAD72	Ponta de São Lorenço	Male	57.82	4.9	Plantae	Streptophyta	Magnoliopsida	Solanales	Convolvulaceae	Ipomoea sp.1
MAD72	Ponta de São Lorenço	Male	57.82	4.9	Plantae	Streptophyta	Magnoliopsida	Solanales	Solanaceae	Solanum sp.1
MAD73	Ponta de São Lorenço	Female	55.57	3.09	Animalia	Arthropoda	Malacostraca	Isopoda	Armadillidiidae	Armadillidium vulgare
MAD73	Ponta de São Lorenço	Female	55.57	3.09	Animalia	Arthropoda	Malacostraca	Isopoda	Armadillidiidae	Eluma caelatum
MAD73	Ponta de São Lorenço	Female	55.57	3.09	Animalia	Arthropoda	Malacostraca	Isopoda	Porcellionidae	Porcellionides sexfasciatus
MAD73	Ponta de São Lorenço	Female	55.57	3.09	Animalia	Mollusca	Gastropoda	Stylommatophora	Agriolimacidae	Deroceras invadens
MAD73	Ponta de São Lorenço	Female	55.57	3.09	Plantae	Streptophyta	Magnoliopsida	Asterales	Asteraceae	Asteraceae 4
MAD73	Ponta de São Lorenço	Female	55.57	3.09	Plantae	Streptophyta	Magnoliopsida	Asterales	Asteraceae	Asteraceae 5
MAD73	Ponta de São Lorenço	Female	55.57	3.09	Plantae	Streptophyta	Magnoliopsida	Asterales	Asteraceae	Asteraceae 8
MAD73	Ponta de São Lorenço	Female	55.57	3.09	Plantae	Streptophyta	Magnoliopsida	Caryophyllales	Nyctaginaceae	Bougainvillea sp.1
MAD73	Ponta de São Lorenço	Female	55.57	3.09	Plantae	Streptophyta	Magnoliopsida	Fabales	Fabaceae	Bituminaria sp.1
MAD73	Ponta de São Lorenço	Female	55.57	3.09	Plantae	Streptophyta	Magnoliopsida	Fabales	Fabaceae	Lotus sp.1
MAD73	Ponta de São Lorenço	Female	55.57	3.09	Plantae	Streptophyta	Magnoliopsida	Malpighiales	Euphorbiaceae	Mercurialis sp.1
MAD73	Ponta de São Lorenço	Female	55.57	3.09	Plantae	Streptophyta	Magnoliopsida	Oxalidales	Oxalidaceae	Oxalis sp.3
MAD74	Ponta de São Lorenço	Male	62.08	5.37	Animalia	Arthropoda	Insecta	Hemiptera	Aphididae	Hyperomyzus lactucae
MAD74	Ponta de São Lorenço	Male	62.08	5.37	Animalia	Arthropoda	Malacostraca	Isopoda	Armadillidiidae	Armadillidium vulgare
MAD74	Ponta de São Lorenço	Male	62.08	5.37	Plantae	Streptophyta	Magnoliopsida	Apiales	Apiaceae	Apiaceae 1
MAD74	Ponta de São Lorenço	Male	62.08	5.37	Plantae	Streptophyta	Magnoliopsida	Apiales	Apiaceae	Apiaceae 2
MAD74	Ponta de São Lorenço	Male	62.08	5.37	Plantae	Streptophyta	Magnoliopsida	Asterales	Asteraceae	Asteraceae 4
MAD74	Ponta de São Lorenço	Male	62.08	5.37	Plantae	Streptophyta	Magnoliopsida	Asterales	Asteraceae	Asteraceae 5
MAD74	Ponta de São Lorenço	Male	62.08	5.37	Plantae	Streptophyta	Magnoliopsida	Asterales	Asteraceae	Asteraceae 6
MAD74	Ponta de São Lorenço	Male	62.08	5.37	Plantae	Streptophyta	Magnoliopsida	Brassicales	Brassicaceae	Brassicaceae 1
MAD74	Ponta de São Lorenço	Male	62.08	5.37	Plantae	Streptophyta	Magnoliopsida	Fabales	Fabaceae	Bituminaria sp.1
MAD74	Ponta de São Lorenço	Male	62.08	5.37	Plantae	Streptophyta	Magnoliopsida	Fabales	Fabaceae	no match
MAD74	Ponta de São Lorenço	Male	62.08	5.37	Plantae	Streptophyta	Magnoliopsida	Lamiales	Pedaliaceae	Pedaliaceae 1
MAD74	Ponta de São Lorenço	Male	62.08	5.37	Plantae	Streptophyta	Magnoliopsida	Poales	Poaceae	Avena sp.1
MAD74	Ponta de São Lorenço	Male	62.08	5.37	Plantae	Streptophyta	Magnoliopsida	Poales	Poaceae	Hordeum sp.1
MAD74	Ponta de São Lorenço	Male	62.08	5.37	Plantae	Streptophyta	Magnoliopsida	Poales	Poaceae	Poaceae 3
MAD74	Ponta de São Lorenço	Male	62.08	5.37	Plantae	Streptophyta	Magnoliopsida	Ranunculales	Papaveraceae	Fumaria sp.1
MAD74	Ponta de São Lorenço	Male	62.08	5.37	Plantae	Streptophyta	Magnoliopsida	Ranunculales	Papaveraceae	Papaveraceae 1
MAD74	Ponta de São Lorenço	Male	62.08	5.37	Plantae	Streptophyta	Magnoliopsida	Rosales	Moraceae	Ficus sp.1
MAD74	Ponta de São Lorenço	Male	62.08	5.37	Plantae	Streptophyta	Magnoliopsida	Solanales	Convolvulaceae	Convolvulaceae 1
MAD74	Ponta de São Lorenço	Male	62.08	5.37	Plantae	Streptophyta	Magnoliopsida	Solanales	Convolvulaceae	Ipomoea sp.1
MAD75	Ponta de São Lorenço	Male	58.18	4.4	Animalia	Arthropoda	Malacostraca	Isopoda	Porcellionidae	Porcellionides sexfasciatus
MAD75	Ponta de São Lorenço	Male	58.18	4.4	Animalia	Mollusca	Gastropoda	Stylommatophora	Geomitridae	Actinella nitidiuscula
MAD75	Ponta de São Lorenço	Male	58.18	4.4	Plantae	Streptophyta	Magnoliopsida	Apiales	Apiaceae	Apiaceae 2
MAD75	Ponta de São Lorenço	Male	58.18	4.4	Plantae	Streptophyta	Magnoliopsida	Apiales	Pittosporaceae	Pittosporaceae 1
MAD75	Ponta de São Lorenço	Male	58.18	4.4	Plantae	Streptophyta	Magnoliopsida	Asterales	Asteraceae	Asteraceae 4
MAD75	Ponta de São Lorenço	Male	58.18	4.4	Plantae	Streptophyta	Magnoliopsida	Asterales	Asteraceae	Asteraceae 6
MAD75	Ponta de São Lorenço	Male	58.18	4.4	Plantae	Streptophyta	Magnoliopsida	Dipsacales	Caprifoliaceae	Abelia sp.1
MAD75	Ponta de São Lorenço	Male	58.18	4.4	Plantae	Streptophyta	Magnoliopsida	Fabales	Fabaceae	Cicer sp.1
MAD75	Ponta de São Lorenço	Male	58.18	4.4	Plantae	Streptophyta	Magnoliopsida	Fabales	Fabaceae	Medicago sp.1
MAD75	Ponta de São Lorenço	Male	58.18	4.4	Plantae	Streptophyta	Magnoliopsida	Fabales	Fabaceae	Pisum sp.1
MAD75	Ponta de São Lorenço	Male	58.18	4.4	Plantae	Streptophyta	Magnoliopsida	Malvales	Malvaceae	Malvaceae 2
MAD75	Ponta de São Lorenço	Male	58.18	4.4	Plantae	Streptophyta	Magnoliopsida	Oxalidales	Oxalidaceae	Oxalis sp.3
MAD75	Ponta de São Lorenço	Male	58.18	4.4	Plantae	Streptophyta	Magnoliopsida	Poales	Poaceae	Poaceae 1
MAD75	Ponta de São Lorenço	Male	58.18	4.4	Plantae	Streptophyta	Magnoliopsida	Poales	Poaceae	Poaceae 3
MAD75	Ponta de São Lorenço	Male	58.18	4.4	Plantae	Streptophyta	Magnoliopsida	Rosales	Rosaceae	Rosaceae 1
MAD75	Ponta de São Lorenço	Male	58.18	4.4	Plantae	Streptophyta	Magnoliopsida	Sapindales	Rutaceae	Citrus sp.1
MAD75	Ponta de São Lorenço	Male	58.18	4.4	Plantae	Streptophyta	Magnoliopsida	Solanales	Solanaceae	Solanum sp.2
MAD75	Ponta de São Lorenço	Male	58.18	4.4	Plantae	Streptophyta	Magnoliopsida	Zingiberales	Musaceae	Musa sp.1
MAD75	Ponta de São Lorenço	Male	58.18	4.4	Plantae	Streptophyta	Pinopsida	Pinales	Pinaceae	Picea sp.1
MAD75	Ponta de São Lorenço	Male	58.18	4.4	Plantae	Streptophyta	Pinopsida	Pinales	Pinaceae	Pinus sp.1
MAD75	Ponta de São Lorenço	Male	58.18	4.4	Plantae	Streptophyta	Polypodiopsida	Cyatheales	Cyatheaceae	Cyatheaceae 1
MAD76	Ponta de São Lorenço	Male	55.25	4.22	Animalia	Arthropoda	Insecta	Hemiptera	Aphididae	Hyperomyzus lactucae
MAD76	Ponta de São Lorenço	Male	55.25	4.22	Plantae	Streptophyta	Magnoliopsida	Asterales	Asteraceae	Asteraceae 4
MAD76	Ponta de São Lorenço	Male	55.25	4.22	Plantae	Streptophyta	Magnoliopsida	Asterales	Asteraceae	Taraxacum sp.1
MAD77	Ponta de São Lorenço	Male	62.81	5.54	Plantae	Streptophyta	Magnoliopsida	Asterales	Asteraceae	Asteraceae 8
MAD77	Ponta de São Lorenço	Male	62.81	5.54	Plantae	Streptophyta	Magnoliopsida	Boraginales	Boraginaceae	Boraginaceae 1
MAD77	Ponta de São Lorenço	Male	62.81	5.54	Plantae	Streptophyta	Magnoliopsida	Brassicales	Tropaeolaceae	Tropaeolaceae 2
MAD77	Ponta de São Lorenço	Male	62.81	5.54	Plantae	Streptophyta	Magnoliopsida	Brassicales	Tropaeolaceae	Tropaeolaceae 4
MAD77	Ponta de São Lorenço	Male	62.81	5.54	Plantae	Streptophyta	Magnoliopsida	Cornales	Hydrangeaceae	Hydrangea sp.1
MAD77	Ponta de São Lorenço	Male	62.81	5.54	Plantae	Streptophyta	Magnoliopsida	Fabales	Fabaceae	Arachis sp.1
MAD77	Ponta de São Lorenço	Male	62.81	5.54	Plantae	Streptophyta	Magnoliopsida	Fabales	Fabaceae	Lotus sp.1
MAD77	Ponta de São Lorenço	Male	62.81	5.54	Plantae	Streptophyta	Magnoliopsida	Fabales	Fabaceae	Pisum sp.1
MAD77	Ponta de São Lorenço	Male	62.81	5.54	Plantae	Streptophyta	Magnoliopsida	Sapindales	Anacardiaceae	Anacardiaceae 1
MAD77	Ponta de São Lorenço	Male	62.81	5.54	Plantae	Streptophyta	Magnoliopsida	Zingiberales	Musaceae	Musa sp.1
MAD77	Ponta de São Lorenço	Male	62.81	5.54	Plantae	Streptophyta	Pinopsida	Pinales	Pinaceae	Pinus sp.1
MAD78	Ponta de São Lorenço	Female	50.2	2.31	Animalia	Arthropoda	Insecta	Hymenoptera	Formicidae	Technomyrmex pallipes
MAD78	Ponta de São Lorenço	Female	50.2	2.31	Animalia	Arthropoda	Malacostraca	Isopoda	Armadillidiidae	Armadillidium vulgare
MAD78	Ponta de São Lorenço	Female	50.2	2.31	Plantae	Streptophyta	Magnoliopsida	Asterales	Asteraceae	Asteraceae 4
MAD78	Ponta de São Lorenço	Female	50.2	2.31	Plantae	Streptophyta	Magnoliopsida	Asterales	Asteraceae	Asteraceae 9
MAD78	Ponta de São Lorenço	Female	50.2	2.31	Plantae	Streptophyta	Magnoliopsida	Brassicales	Tropaeolaceae	Tropaeolaceae 9
MAD78	Ponta de São Lorenço	Female	50.2	2.31	Plantae	Streptophyta	Magnoliopsida	Dipsacales	Caprifoliaceae	Abelia sp.1
MAD78	Ponta de São Lorenço	Female	50.2	2.31	Plantae	Streptophyta	Magnoliopsida	Laurales	Lauraceae	Lauraceae 1
MAD78	Ponta de São Lorenço	Female	50.2	2.31	Plantae	Streptophyta	Magnoliopsida	Myrtales	Myrtaceae	Myrtaceae 1
MAD78	Ponta de São Lorenço	Female	50.2	2.31	Plantae	Streptophyta	Magnoliopsida	Oxalidales	Oxalidaceae	Oxalis sp.3
MAD78	Ponta de São Lorenço	Female	50.2	2.31	Plantae	Streptophyta	Magnoliopsida	Poales	Poaceae	Poaceae 1
MAD78	Ponta de São Lorenço	Female	50.2	2.31	Plantae	Streptophyta	Magnoliopsida	Poales	Poaceae	Poaceae 3
MAD78	Ponta de São Lorenço	Female	50.2	2.31	Plantae	Streptophyta	Magnoliopsida	Rosales	Rosaceae	Rosaceae 1
MAD78	Ponta de São Lorenço	Female	50.2	2.31	Plantae	Streptophyta	Magnoliopsida	Rosales	Urticaceae	Parietaria sp.1
MAD78	Ponta de São Lorenço	Female	50.2	2.31	Plantae	Streptophyta	Magnoliopsida	Sapindales	Meliaceae	Meliaceae 1
MAD79	Ponta de São Lorenço	Male	67.72	7.06	Animalia	Arthropoda	Malacostraca	Isopoda	Armadillidiidae	Armadillidium vulgare
MAD79	Ponta de São Lorenço	Male	67.72	7.06	Plantae	Streptophyta	Magnoliopsida	Asterales	Asteraceae	Asteraceae 5
MAD79	Ponta de São Lorenço	Male	67.72	7.06	Plantae	Streptophyta	Magnoliopsida	Fabales	Fabaceae	Lotus sp.1
MAD8	Funchal	Female	56	3.97	Plantae	Streptophyta	Magnoliopsida	Myrtales	Myrtaceae	Myrtaceae 1
MAD8	Funchal	Female	56	3.97	Plantae	Streptophyta	Magnoliopsida	Rosales	Urticaceae	Urticaceae 1
MAD8	Funchal	Female	56	3.97	Plantae	Streptophyta	Magnoliopsida	Zingiberales	Musaceae	Musa sp.1
MAD80	Ponta de São Lorenço	Female	55.75	3.27	Animalia	Arthropoda	Insecta	Diptera	Syrphidae	Sphaerophoria sp.1
MAD80	Ponta de São Lorenço	Female	55.75	3.27	Animalia	Arthropoda	Insecta	Hemiptera	Aphididae	Hyperomyzus lactucae
MAD80	Ponta de São Lorenço	Female	55.75	3.27	Animalia	Arthropoda	Insecta	Hemiptera	Cicadellidae	Cicadellidae 1
MAD80	Ponta de São Lorenço	Female	55.75	3.27	Animalia	Arthropoda	Malacostraca	Isopoda	Armadillidiidae	Armadillidium vulgare
MAD80	Ponta de São Lorenço	Female	55.75	3.27	Animalia	Arthropoda	Malacostraca	Isopoda	Armadillidiidae	Eluma caelatum
MAD80	Ponta de São Lorenço	Female	55.75	3.27	Plantae	Streptophyta	Magnoliopsida	Apiales	Apiaceae	Apiaceae 2
MAD80	Ponta de São Lorenço	Female	55.75	3.27	Plantae	Streptophyta	Magnoliopsida	Asterales	Asteraceae	Asteraceae 4
MAD80	Ponta de São Lorenço	Female	55.75	3.27	Plantae	Streptophyta	Magnoliopsida	Asterales	Asteraceae	Asteraceae 5
MAD80	Ponta de São Lorenço	Female	55.75	3.27	Plantae	Streptophyta	Magnoliopsida	Fabales	Fabaceae	Bituminaria sp.1
MAD80	Ponta de São Lorenço	Female	55.75	3.27	Plantae	Streptophyta	Magnoliopsida	Malpighiales	Euphorbiaceae	Euphorbiaceae 1
MAD80	Ponta de São Lorenço	Female	55.75	3.27	Plantae	Streptophyta	Magnoliopsida	Malpighiales	Euphorbiaceae	Mercurialis annua
MAD80	Ponta de São Lorenço	Female	55.75	3.27	Plantae	Streptophyta	Magnoliopsida	Malpighiales	Euphorbiaceae	Mercurialis sp.1
MAD80	Ponta de São Lorenço	Female	55.75	3.27	Plantae	Streptophyta	Magnoliopsida	Sapindales	Sapindaceae	Acer sp.1
MAD80	Ponta de São Lorenço	Female	55.75	3.27	Plantae	Streptophyta	Pinopsida	Pinales	Pinaceae	Pinus sp.1
MAD81	Ponta de São Lorenço	Female	52.64	2.4	Animalia	Arthropoda	Arachnida	Araneae	Mimetidae	Ero sp.1
MAD81	Ponta de São Lorenço	Female	52.64	2.4	Animalia	Arthropoda	Malacostraca	Isopoda	Armadillidiidae	Armadillidium vulgare
MAD81	Ponta de São Lorenço	Female	52.64	2.4	Plantae	Streptophyta	Magnoliopsida	Malpighiales	Euphorbiaceae	Mercurialis annua
MAD81	Ponta de São Lorenço	Female	52.64	2.4	Plantae	Streptophyta	Magnoliopsida	Malpighiales	Euphorbiaceae	Mercurialis sp.1
MAD81	Ponta de São Lorenço	Female	52.64	2.4	Plantae	Streptophyta	Magnoliopsida	Zingiberales	Musaceae	Musa sp.1
MAD85	Ponta de São Lorenço	Female	53.94	3.16	Animalia	Arthropoda	Insecta	Orthoptera	Tettigoniidae	Decticus albifrons
MAD85	Ponta de São Lorenço	Female	53.94	3.16	Animalia	Arthropoda	Malacostraca	Isopoda	Armadillidiidae	Armadillidium vulgare
MAD85	Ponta de São Lorenço	Female	53.94	3.16	Animalia	Mollusca	Gastropoda	Stylommatophora	Helicidae	Helix aspersa
MAD85	Ponta de São Lorenço	Female	53.94	3.16	Plantae	Streptophyta	Magnoliopsida	Apiales	Apiaceae	Apiaceae 2
MAD85	Ponta de São Lorenço	Female	53.94	3.16	Plantae	Streptophyta	Magnoliopsida	Asterales	Asteraceae	Asteraceae 5
MAD85	Ponta de São Lorenço	Female	53.94	3.16	Plantae	Streptophyta	Magnoliopsida	Caryophyllales	Caryophyllaceae	Silene sp.2
MAD85	Ponta de São Lorenço	Female	53.94	3.16	Plantae	Streptophyta	Magnoliopsida	Fabales	Fabaceae	Bituminaria sp.1
MAD85	Ponta de São Lorenço	Female	53.94	3.16	Plantae	Streptophyta	Magnoliopsida	Malpighiales	Euphorbiaceae	Mercurialis sp.1
MAD85	Ponta de São Lorenço	Female	53.94	3.16	Plantae	Streptophyta	Magnoliopsida	Zingiberales	Musaceae	Musa sp.1
MAD86	Ponta de São Lorenço	Male	61.08	5.06	Animalia	Arthropoda	Malacostraca	Isopoda	Armadillidiidae	Armadillidium vulgare
MAD86	Ponta de São Lorenço	Male	61.08	5.06	Animalia	Arthropoda	Malacostraca	Isopoda	Armadillidiidae	Eluma caelatum
MAD86	Ponta de São Lorenço	Male	61.08	5.06	Animalia	Mollusca	Gastropoda	Stylommatophora	Geomitridae	Actinella nitidiuscula
MAD86	Ponta de São Lorenço	Male	61.08	5.06	Plantae	Streptophyta	Magnoliopsida	Apiales	Apiaceae	Apiaceae 2
MAD86	Ponta de São Lorenço	Male	61.08	5.06	Plantae	Streptophyta	Magnoliopsida	Asterales	Asteraceae	Asteraceae 4
MAD86	Ponta de São Lorenço	Male	61.08	5.06	Plantae	Streptophyta	Magnoliopsida	Asterales	Asteraceae	Asteraceae 5
MAD86	Ponta de São Lorenço	Male	61.08	5.06	Plantae	Streptophyta	Magnoliopsida	Malpighiales	Euphorbiaceae	Euphorbiaceae 1
MAD86	Ponta de São Lorenço	Male	61.08	5.06	Plantae	Streptophyta	Magnoliopsida	Malpighiales	Euphorbiaceae	Mercurialis annua
MAD86	Ponta de São Lorenço	Male	61.08	5.06	Plantae	Streptophyta	Magnoliopsida	Malpighiales	Euphorbiaceae	Mercurialis sp.3
MAD86	Ponta de São Lorenço	Male	61.08	5.06	Plantae	Streptophyta	Magnoliopsida	Malpighiales	Euphorbiaceae	Mercurialis sp.1
MAD86	Ponta de São Lorenço	Male	61.08	5.06	Plantae	Streptophyta	Magnoliopsida	Poales	Poaceae	Poaceae 3
MAD86	Ponta de São Lorenço	Male	61.08	5.06	Plantae	Streptophyta	Pinopsida	Cupressales	Cupressaceae	Cupressaceae 1
MAD87	Ponta de São Lorenço	Male	59.25	6.88	Animalia	Arthropoda	Insecta	Orthoptera	Tettigoniidae	Decticus albifrons
MAD87	Ponta de São Lorenço	Male	59.25	6.88	Animalia	Arthropoda	Malacostraca	Isopoda	Armadillidiidae	Armadillidium vulgare
MAD87	Ponta de São Lorenço	Male	59.25	6.88	Plantae	Streptophyta	Magnoliopsida	Apiales	Apiaceae	Apiaceae 2
MAD87	Ponta de São Lorenço	Male	59.25	6.88	Plantae	Streptophyta	Magnoliopsida	Asterales	Asteraceae	Asteraceae 4
MAD87	Ponta de São Lorenço	Male	59.25	6.88	Plantae	Streptophyta	Magnoliopsida	Asterales	Asteraceae	Asteraceae 5
MAD87	Ponta de São Lorenço	Male	59.25	6.88	Plantae	Streptophyta	Magnoliopsida	Boraginales	Boraginaceae	Boraginaceae 1
MAD87	Ponta de São Lorenço	Male	59.25	6.88	Plantae	Streptophyta	Magnoliopsida	Caryophyllales	Caryophyllaceae	Silene sp.2
MAD87	Ponta de São Lorenço	Male	59.25	6.88	Plantae	Streptophyta	Magnoliopsida	Cornales	Hydrangeaceae	Hydrangea sp.1
MAD87	Ponta de São Lorenço	Male	59.25	6.88	Plantae	Streptophyta	Magnoliopsida	Lamiales	Acanthaceae	Acanthaceae 1
MAD87	Ponta de São Lorenço	Male	59.25	6.88	Plantae	Streptophyta	Magnoliopsida	Poales	Poaceae	Brachypodium sp.1
MAD87	Ponta de São Lorenço	Male	59.25	6.88	Plantae	Streptophyta	Magnoliopsida	Rosales	Rosaceae	Rosaceae 1
MAD87	Ponta de São Lorenço	Male	59.25	6.88	Plantae	Streptophyta	Magnoliopsida	Solanales	Convolvulaceae	Convolvulaceae 1
MAD87	Ponta de São Lorenço	Male	59.25	6.88	Plantae	Streptophyta	Magnoliopsida	Solanales	Convolvulaceae	Ipomoea sp.1
MAD87	Ponta de São Lorenço	Male	59.25	6.88	Plantae	Streptophyta	Magnoliopsida	Zingiberales	Musaceae	Musa sp.1
MAD89	Ponta de São Lorenço	Male	64.63	6.2	Animalia	Arthropoda	Insecta	Hymenoptera	Formicidae	Technomyrmex pallipes
MAD89	Ponta de São Lorenço	Male	64.63	6.2	Animalia	Arthropoda	Malacostraca	Isopoda	Armadillidiidae	Armadillidium vulgare
MAD89	Ponta de São Lorenço	Male	64.63	6.2	Plantae	Streptophyta	Magnoliopsida	Solanales	Convolvulaceae	Convolvulaceae 1
MAD89	Ponta de São Lorenço	Male	64.63	6.2	Plantae	Streptophyta	Magnoliopsida	Solanales	Convolvulaceae	Ipomoea sp.1
MAD89	Ponta de São Lorenço	Male	64.63	6.2	Plantae	Streptophyta	Magnoliopsida	Zingiberales	Musaceae	Musa sp.1
MAD9	Funchal	Female	58.09	4.75	Animalia	Arthropoda	Insecta	Hymenoptera	Formicidae	Technomyrmex pallipes
MAD9	Funchal	Female	58.09	4.75	Animalia	Arthropoda	Malacostraca	Isopoda	Armadillidiidae	Armadillidium vulgare
MAD9	Funchal	Female	58.09	4.75	Animalia	Arthropoda	Malacostraca	Isopoda	Porcellionidae	Porcellionides sexfasciatus
MAD9	Funchal	Female	58.09	4.75	Animalia	Mollusca	Gastropoda	Stylommatophora	Agriolimacidae	Deroceras panormitanum
MAD9	Funchal	Female	58.09	4.75	Plantae	Streptophyta	Magnoliopsida	Apiales	Apiaceae	Apiaceae 2
MAD9	Funchal	Female	58.09	4.75	Plantae	Streptophyta	Magnoliopsida	Asterales	Asteraceae	Asteraceae 4
MAD9	Funchal	Female	58.09	4.75	Plantae	Streptophyta	Magnoliopsida	Asterales	Asteraceae	Asteraceae 9
MAD9	Funchal	Female	58.09	4.75	Plantae	Streptophyta	Magnoliopsida	Brassicales	Brassicaceae	Brassica sp.1
MAD9	Funchal	Female	58.09	4.75	Plantae	Streptophyta	Magnoliopsida	Lamiales	Plantaginaceae	Veronica sp.1
MAD9	Funchal	Female	58.09	4.75	Plantae	Streptophyta	Magnoliopsida	Malpighiales	Euphorbiaceae	Euphorbia sp.1
MAD9	Funchal	Female	58.09	4.75	Plantae	Streptophyta	Magnoliopsida	Oxalidales	Oxalidaceae	Oxalis sp.2
MAD9	Funchal	Female	58.09	4.75	Plantae	Streptophyta	Magnoliopsida	Oxalidales	Oxalidaceae	Oxalis sp.3
MAD9	Funchal	Female	58.09	4.75	Plantae	Streptophyta	Magnoliopsida	Ranunculales	Papaveraceae	Fumaria sp.1
MAD9	Funchal	Female	58.09	4.75	Plantae	Streptophyta	Magnoliopsida	Rosales	Urticaceae	Urticaceae 1
MAD9	Funchal	Female	58.09	4.75	Plantae	Streptophyta	Magnoliopsida	Zingiberales	Musaceae	Musa sp.1
MAD90	Ponta de São Lorenço	Female	55.12	3.7	Animalia	Arthropoda	Malacostraca	Isopoda	Armadillidiidae	Armadillidium vulgare
MAD90	Ponta de São Lorenço	Female	55.12	3.7	Plantae	Streptophyta	Magnoliopsida	Apiales	Apiaceae	Apiaceae 1
MAD90	Ponta de São Lorenço	Female	55.12	3.7	Plantae	Streptophyta	Magnoliopsida	Apiales	Apiaceae	Apiaceae 2
MAD90	Ponta de São Lorenço	Female	55.12	3.7	Plantae	Streptophyta	Magnoliopsida	Asterales	Asteraceae	Asteraceae 4
MAD90	Ponta de São Lorenço	Female	55.12	3.7	Plantae	Streptophyta	Magnoliopsida	Caryophyllales	Amaranthaceae	Achyranthes sp.1
MAD90	Ponta de São Lorenço	Female	55.12	3.7	Plantae	Streptophyta	Magnoliopsida	Caryophyllales	Chenopodiaceae	Chenopodium sp.1
MAD90	Ponta de São Lorenço	Female	55.12	3.7	Plantae	Streptophyta	Magnoliopsida	Fabales	Fabaceae	Bituminaria sp.1
MAD90	Ponta de São Lorenço	Female	55.12	3.7	Plantae	Streptophyta	Magnoliopsida	Fabales	Fabaceae	Lotus sp.1
MAD90	Ponta de São Lorenço	Female	55.12	3.7	Plantae	Streptophyta	Magnoliopsida	Fabales	Fabaceae	Trifolium sp.1
MAD90	Ponta de São Lorenço	Female	55.12	3.7	Plantae	Streptophyta	Magnoliopsida	Malpighiales	Euphorbiaceae	Mercurialis annua
MAD90	Ponta de São Lorenço	Female	55.12	3.7	Plantae	Streptophyta	Magnoliopsida	Malpighiales	Euphorbiaceae	Mercurialis sp.1
MAD90	Ponta de São Lorenço	Female	55.12	3.7	Plantae	Streptophyta	Magnoliopsida	Oxalidales	Oxalidaceae	Oxalis sp.3
MAD90	Ponta de São Lorenço	Female	55.12	3.7	Plantae	Streptophyta	Magnoliopsida	Poales	Poaceae	Poaceae 3
MAD90	Ponta de São Lorenço	Female	55.12	3.7	Plantae	Streptophyta	Magnoliopsida	Solanales	Convolvulaceae	Ipomoea sp.1
MAD90	Ponta de São Lorenço	Female	55.12	3.7	Plantae	Streptophyta	Magnoliopsida	Solanales	Solanaceae	Solanum sp.1
MAD90	Ponta de São Lorenço	Female	55.12	3.7	Plantae	Streptophyta	Pinopsida	Pinales	Pinaceae	Pinus sp.1
MAD92	Ponta de São Lorenço	Female	53.63	3.45	Animalia	Arthropoda	Diplopoda	Julida	Julidae	Ommatoiulus moreleti
MAD92	Ponta de São Lorenço	Female	53.63	3.45	Animalia	Arthropoda	Insecta	Diptera	Syrphidae	Scaeva pyrastri
MAD92	Ponta de São Lorenço	Female	53.63	3.45	Animalia	Arthropoda	Insecta	Hemiptera	Aphididae	Longicaudinus corydalisicola
MAD92	Ponta de São Lorenço	Female	53.63	3.45	Animalia	Arthropoda	Malacostraca	Isopoda	Armadillidiidae	Armadillidium vulgare
MAD92	Ponta de São Lorenço	Female	53.63	3.45	Plantae	Streptophyta	Magnoliopsida	Apiales	Apiaceae	Apiaceae 2
MAD92	Ponta de São Lorenço	Female	53.63	3.45	Plantae	Streptophyta	Magnoliopsida	Asterales	Asteraceae	Asteraceae 4
MAD92	Ponta de São Lorenço	Female	53.63	3.45	Plantae	Streptophyta	Magnoliopsida	Fabales	Fabaceae	Bituminaria sp.1
MAD92	Ponta de São Lorenço	Female	53.63	3.45	Plantae	Streptophyta	Magnoliopsida	Malpighiales	Euphorbiaceae	Mercurialis annua
MAD92	Ponta de São Lorenço	Female	53.63	3.45	Plantae	Streptophyta	Magnoliopsida	Malpighiales	Euphorbiaceae	Mercurialis sp.1
MAD94	Ponta de São Lorenço	Male	67.26	6.28	Animalia	Arthropoda	Malacostraca	Isopoda	Armadillidiidae	Armadillidium vulgare
MAD94	Ponta de São Lorenço	Male	67.26	6.28	Plantae	Streptophyta	Magnoliopsida	Apiales	Apiaceae	Apiaceae 2
MAD94	Ponta de São Lorenço	Male	67.26	6.28	Plantae	Streptophyta	Magnoliopsida	Asterales	Asteraceae	Arctotis venusta
MAD94	Ponta de São Lorenço	Male	67.26	6.28	Plantae	Streptophyta	Magnoliopsida	Asterales	Asteraceae	Asteraceae 4
MAD94	Ponta de São Lorenço	Male	67.26	6.28	Plantae	Streptophyta	Magnoliopsida	Asterales	Asteraceae	Asteraceae 5
MAD94	Ponta de São Lorenço	Male	67.26	6.28	Plantae	Streptophyta	Magnoliopsida	Asterales	Asteraceae	Asteraceae 6
MAD94	Ponta de São Lorenço	Male	67.26	6.28	Plantae	Streptophyta	Magnoliopsida	Asterales	Asteraceae	Asteraceae 9
MAD94	Ponta de São Lorenço	Male	67.26	6.28	Plantae	Streptophyta	Magnoliopsida	Fabales	Fabaceae	Bituminaria sp.1
MAD94	Ponta de São Lorenço	Male	67.26	6.28	Plantae	Streptophyta	Magnoliopsida	Fagales	Fagaceae	Quercus sp.1
MAD94	Ponta de São Lorenço	Male	67.26	6.28	Plantae	Streptophyta	Magnoliopsida	Malpighiales	Euphorbiaceae	Mercurialis sp.1
MAD94	Ponta de São Lorenço	Male	67.26	6.28	Plantae	Streptophyta	Magnoliopsida	Oxalidales	Oxalidaceae	Oxalis sp.3
MAD94	Ponta de São Lorenço	Male	67.26	6.28	Plantae	Streptophyta	Magnoliopsida	Rosales	Rosaceae	Prunus sp.1
MAD94	Ponta de São Lorenço	Male	67.26	6.28	Plantae	Streptophyta	Magnoliopsida	Sapindales	Anacardiaceae	Anacardium sp.1
MAD94	Ponta de São Lorenço	Male	67.26	6.28	Plantae	Streptophyta	Magnoliopsida	Solanales	Convolvulaceae	Convolvulaceae 1
MAD94	Ponta de São Lorenço	Male	67.26	6.28	Plantae	Streptophyta	Magnoliopsida	Solanales	Convolvulaceae	Ipomoea sp.1
MAD94	Ponta de São Lorenço	Male	67.26	6.28	Plantae	Streptophyta	Magnoliopsida	Zingiberales	Musaceae	Musa sp.1
MAD95	Ponta de São Lorenço	Female	48.78	2.21	Animalia	Arthropoda	Insecta	Lepidoptera	Tineidae	Xystrologa sp.1
MAD95	Ponta de São Lorenço	Female	48.78	2.21	Animalia	Arthropoda	Insecta	Orthoptera	Tettigoniidae	Decticus albifrons
MAD95	Ponta de São Lorenço	Female	48.78	2.21	Animalia	Arthropoda	Malacostraca	Isopoda	Armadillidiidae	Armadillidium vulgare
MAD95	Ponta de São Lorenço	Female	48.78	2.21	Animalia	Arthropoda	Malacostraca	Isopoda	Porcellionidae	Porcellionides sexfasciatus
MAD95	Ponta de São Lorenço	Female	48.78	2.21	Plantae	Streptophyta	Magnoliopsida	Apiales	Apiaceae	Apiaceae 2
MAD95	Ponta de São Lorenço	Female	48.78	2.21	Plantae	Streptophyta	Magnoliopsida	Asterales	Asteraceae	Asteraceae 4
MAD95	Ponta de São Lorenço	Female	48.78	2.21	Plantae	Streptophyta	Magnoliopsida	Caryophyllales	Caryophyllaceae	Silene sp.2
MAD95	Ponta de São Lorenço	Female	48.78	2.21	Plantae	Streptophyta	Magnoliopsida	Fabales	Fabaceae	Bituminaria sp.1
MAD95	Ponta de São Lorenço	Female	48.78	2.21	Plantae	Streptophyta	Magnoliopsida	Poales	Poaceae	Poaceae 1
MAD95	Ponta de São Lorenço	Female	48.78	2.21	Plantae	Streptophyta	Magnoliopsida	Poales	Poaceae	Poaceae 3
MAD95	Ponta de São Lorenço	Female	48.78	2.21	Plantae	Streptophyta	Magnoliopsida	Solanales	Convolvulaceae	Convolvulaceae 1
MAD95	Ponta de São Lorenço	Female	48.78	2.21	Plantae	Streptophyta	Magnoliopsida	Solanales	Convolvulaceae	Ipomoea sp.1
MAD95	Ponta de São Lorenço	Female	48.78	2.21	Plantae	Streptophyta	Magnoliopsida	Zingiberales	Musaceae	Musa sp.1
MAD96	São Vicente	Male	69.96	7.25	Animalia	Arthropoda	Insecta	Hemiptera	Cydnidae	Cydnidae 1
MAD96	São Vicente	Male	69.96	7.25	Animalia	Arthropoda	Malacostraca	Isopoda	Armadillidiidae	Armadillidium vulgare
MAD96	São Vicente	Male	69.96	7.25	Animalia	Mollusca	Gastropoda	Stylommatophora	Agriolimacidae	Deroceras invadens
MAD96	São Vicente	Male	69.96	7.25	Plantae	Streptophyta	Magnoliopsida	Malpighiales	Euphorbiaceae	Mercurialis annua
MAD96	São Vicente	Male	69.96	7.25	Plantae	Streptophyta	Magnoliopsida	Myrtales	Myrtaceae	Myrtaceae 1
MAD96	São Vicente	Male	69.96	7.25	Plantae	Streptophyta	Magnoliopsida	Oxalidales	Oxalidaceae	Oxalis sp.3
MAD96	São Vicente	Male	69.96	7.25	Plantae	Streptophyta	Magnoliopsida	Poales	Poaceae	Poaceae 1
MAD96	São Vicente	Male	69.96	7.25	Plantae	Streptophyta	Magnoliopsida	Rosales	Urticaceae	Parietaria sp.1
MAD96	São Vicente	Male	69.96	7.25	Plantae	Streptophyta	Magnoliopsida	Zingiberales	Musaceae	Musa sp.1
MAD96	São Vicente	Male	69.96	7.25	Plantae	Streptophyta	Pinopsida	Pinales	Pinaceae	Pinus sp.1
MAD97	São Vicente	Female	58.81	4.21	Animalia	Arthropoda	Malacostraca	Isopoda	Armadillidiidae	Armadillidium vulgare
MAD97	São Vicente	Female	58.81	4.21	Animalia	Arthropoda	Malacostraca	Isopoda	Porcellionidae	Porcellionides sexfasciatus
MAD97	São Vicente	Female	58.81	4.21	Plantae	Streptophyta	Magnoliopsida	Asparagales	Iridaceae	Sisyrinchium sp.1
MAD97	São Vicente	Female	58.81	4.21	Plantae	Streptophyta	Magnoliopsida	Caryophyllales	Nyctaginaceae	Bougainvillea sp.1
MAD97	São Vicente	Female	58.81	4.21	Plantae	Streptophyta	Magnoliopsida	Ericales	Primulaceae	Anagalis sp.1
MAD97	São Vicente	Female	58.81	4.21	Plantae	Streptophyta	Magnoliopsida	Myrtales	Myrtaceae	Metrosideros sp.1
MAD97	São Vicente	Female	58.81	4.21	Plantae	Streptophyta	Magnoliopsida	Oxalidales	Oxalidaceae	Oxalis sp.2
MAD97	São Vicente	Female	58.81	4.21	Plantae	Streptophyta	Magnoliopsida	Oxalidales	Oxalidaceae	Oxalis sp.3
MAD97	São Vicente	Female	58.81	4.21	Plantae	Streptophyta	Magnoliopsida	Poales	Poaceae	Poaceae 1
MAD97	São Vicente	Female	58.81	4.21	Plantae	Streptophyta	Magnoliopsida	Poales	Poaceae	Poaceae 3
MAD99	São Vicente	Female	64.34	7.52	Animalia	Arthropoda	Malacostraca	Isopoda	Armadillidiidae	Armadillidium vulgare
MAD99	São Vicente	Female	64.34	7.52	Animalia	Mollusca	Gastropoda	Stylommatophora	Agriolimacidae	Deroceras panormitanum
MAD99	São Vicente	Female	64.34	7.52	Plantae	Streptophyta	Magnoliopsida	Apiales	Araliaceae	Araliaceae 1
MAD99	São Vicente	Female	64.34	7.52	Plantae	Streptophyta	Magnoliopsida	Asterales	Asteraceae	Asteraceae 4
MAD99	São Vicente	Female	64.34	7.52	Plantae	Streptophyta	Magnoliopsida	Asterales	Asteraceae	Asteraceae 6
MAD99	São Vicente	Female	64.34	7.52	Plantae	Streptophyta	Magnoliopsida	Brassicales	Tropaeolaceae	Tropaeolaceae 4
MAD99	São Vicente	Female	64.34	7.52	Plantae	Streptophyta	Magnoliopsida	Dipsacales	Caprifoliaceae	Abelia sp.1
MAD99	São Vicente	Female	64.34	7.52	Plantae	Streptophyta	Magnoliopsida	Gentianales	Rubiaceae	Rubiaceae 1
MAD99	São Vicente	Female	64.34	7.52	Plantae	Streptophyta	Magnoliopsida	Myrtales	Myrtaceae	Metrosideros sp.1
MAD99	São Vicente	Female	64.34	7.52	Plantae	Streptophyta	Magnoliopsida	Oxalidales	Oxalidaceae	Oxalis sp.3
MAD99	São Vicente	Female	64.34	7.52	Plantae	Streptophyta	Magnoliopsida	Poales	Poaceae	Poaceae 1
MAD99	São Vicente	Female	64.34	7.52	Plantae	Streptophyta	Magnoliopsida	Poales	Poaceae	Poaceae 3
MAD99	São Vicente	Female	64.34	7.52	Plantae	Streptophyta	Magnoliopsida	Rosales	Rosaceae	Prunus sp.1
MAD99	São Vicente	Female	64.34	7.52	Plantae	Streptophyta	Magnoliopsida	Rosales	Rosaceae	Rosaceae 1
MAD99	São Vicente	Female	64.34	7.52	Plantae	Streptophyta	Magnoliopsida	Saxifragales	Crassulaceae	Crassulaceae 1
MAD99	São Vicente	Female	64.34	7.52	Plantae	Streptophyta	Magnoliopsida	Solanales	Solanaceae	Solanum sp.2
MAD99	São Vicente	Female	64.34	7.52	Plantae	Streptophyta	Magnoliopsida	Zingiberales	Musaceae	Musa sp.1
MAD99	São Vicente	Female	64.34	7.52	Plantae	Streptophyta	Pinopsida	Pinales	Pinaceae	Pinus sp.1
MAD99	São Vicente	Female	64.34	7.52	Plantae	Streptophyta	Polypodiopsida	Polypodiales	Polypodiaceae	Polypodiaceae 1

## Sheet: TableS2
Table S2. Two-way ANOVA results on the effect of population and sex on body size (SVL) and mass (weight).
	df	Sum Sq	Mean Sq	F value	P-value
For SVL
Pop	7	0.1942	0.0277	2.714	0.0115
Sex	1	0.8341	0.8341	81.619	< 0.001
Pop:Sex	7	0.0435	0.0062	0.608	0.7481
Residuals	135	1.3796	0.0102
For weight
Pop	7	2.385	0.341	3.049	0.00521
Sex	1	11.632	11.632	104.065	< 0.001
Pop:Sex	7	0.603	0.086	0.771	0.61256
Residuals	135	15.090	0.112
For weight with SVL as covariate
Pop	7	2.385	0.341	25.789	< 0.001
Sex	1	11.632	11.632	880.266	< 0.001
logSVL	1	13.832	13.832	1046.783	< 0.001
Pop:Sex	7	0.090	0.013	0.973	0.454
Residuals	134	1.771	0.013

## Sheet: TableS3
Table S3. Results from the comparison of the several General Linear Models considering distinct combinations of the predictors. Models were ranked according to the Akaike’s Information Criterion corrected for small samples (AICc), with the best ones marked in bold (ΔAIC < 2 following Burnham & Andersen 2002). K denotes the number of estimated parameters. Predictors: Habitat, Pop (Population), Sex…
	Predictors	K	AICc	Delta AICc	AICc Weight	log likelihood
OTU Richness
Model 11	Pop+Sex+Weight	10	1029.75	0.00	0.24	-504.09
Model 7	Pop+Weight	9	1030.33	0.57	0.18	-505.52
Model 1	Pop	8	1030.73	0.97	0.14	-506.86
Model 6	Pop+SVL	9	1031.41	1.66	0.10	-506.07
Model 10	Pop+Sex+SVL	10	1031.89	2.14	0.08	-505.16
Model 13	Pop+Sex*Weight	11	1031.93	2.18	0.08	-504.02
Model 5	Pop+Sex	9	1032.90	3.15	0.05	-506.81
Model 9	Sex+Weight	3	1033.26	3.50	0.04	-513.55
Model 12	Pop+Sex*SVL	11	1034.22	4.47	0.03	-505.16
Model 4	Weight	2	1035.00	5.25	0.02	-515.46
Model 14	Sex*Weight	4	1035.31	5.56	0.01	-513.52
Model 8	Sex+SVL	3	1035.41	5.65	0.01	-514.62
Model 3	SVL	2	1036.10	6.35	0.01	-516.01
Model 15	Sex*SVL	4	1037.50	7.75	0.00	-514.61
Model 2	Sex	2	1038.86	9.11	0.00	-517.39
Model 18	Pop*Sex	16	1041.50	11.75	0.00	-502.72
Model 16	Pop*Weight	16	1041.71	11.95	0.00	-502.82
Model 17	Pop*SVL	16	1044.78	15.03	0.00	-504.36
Family Richness
Model 1	Pop	8	898.36	0.00	0.18	-440.67
Model 11	Pop+Sex+Weight	10	898.36	0.01	0.18	-438.40
Model 10	Pop+Sex+SVL	10	899.61	1.26	0.10	-439.02
Model 5	Pop+Sex	9	899.63	1.27	0.10	-440.17
Model 7	Pop+Weight	9	899.90	1.55	0.08	-440.31
Model 9	Sex+Weight	3	899.93	1.57	0.08	-446.88
Model 6	Pop+SVL	9	900.27	1.91	0.07	-440.49
Model 13	Pop+Sex*Weight	11	900.65	2.29	0.06	-438.37
Model 8	Sex+SVL	3	901.64	3.28	0.04	-447.74
Model 12	Pop+Sex*SVL	11	901.91	3.55	0.03	-439.00
Model 14	Sex*Weight	4	902.02	3.66	0.03	-446.87
Model 4	Weight	2	902.96	4.61	0.02	-449.44
Model 2	Sex	2	903.52	5.17	0.01	-449.72
Model 3	SVL	2	903.57	5.22	0.01	-449.75
Model 15	Sex*SVL	4	903.68	5.33	0.01	-447.70
Model 18	Pop*Sex	16	909.34	10.99	0.00	-436.64
Model 16	Pop*Weight	16	912.52	14.16	0.00	-438.23
Model 17	Pop*SVL	16	912.78	14.42	0.00	-438.36

## Sheet: TableS4
Table S4. PerMANOVA and Dispersion test results on the effect of several predictors in the diet composition of T. dugesii at the OTU, family and kingdom levels. Significant p-values are highlighted in bold.
	PerMANOVA					Dispersion test
OTU composition	df	Sum of squares	R squared	F model	p-value		df	Sum of squares	Mean squares	F model	p-value
Sex	1	0.356	0.00582	0.9395	0.597
Pop	7	7.475	0.12229	2.8199	0.001	Groups (Pop)	7	0.04432	0.0063321	2.7818	0.009646
SVL	1	0.477	0.00781	1.2602	0.068	Residuals	143	0.32550	0.0022763
weight	1	0.434	0.00711	1.1470	0.153
Sex*Pop	7	2.470	0.04042	0.9320	0.854
Sex*SVL	1	0.411	0.00672	1.0844	0.282
Pop*SVL	7	2.696	0.04411	1.0172	0.366
Sex*weight	1	0.322	0.00527	0.8512	0.842
Pop*weight	7	2.437	0.03987	0.9194	0.926
SVL*weight	1	0.328	0.00537	0.8669	0.781
Sex*Pop*SVL	7	2.621	0.04288	0.9887	0.562
Sex*Pop*weight	7	2.492	0.04078	0.9402	0.847
Sex*SVL*weight	1	0.318	0.00521	0.8403	0.844
Pop*SVL*weight	7	2.852	0.04666	1.0759	0.102
Sex*Pop*SVL*weight	7	2.487	0.04069	0.9383	0.851
Residual	87	32.943	0.53900
Total	150	61.120	1.00000
Family composition
Sex	1	0.245	0.00471	0.7567	0.864
Pop	7	6.026	0.11581	2.6568	0.001	Groups (Pop)	7	0.05733	0.0081903	2.0891	0.04835
SVL	1	0.427	0.00821	1.3187	0.084	Residuals	143	0.56064	0.0039206
weight	1	0.375	0.00722	1.1587	0.223
Sex*Pop	7	1.993	0.03829	0.8785	0.939
Sex*SVL	1	0.364	0.00699	1.1228	0.270
Pop*SVL	7	2.261	0.04346	0.9969	0.482
Sex*weight	1	0.305	0.00587	0.9422	0.570
Pop*weight	7	2.058	0.03955	0.9073	0.870
SVL*weight	1	0.299	0.00575	0.9238	0.605
Sex*Pop*SVL	7	2.331	0.04480	1.0277	0.351
Sex*Pop*weight	7	2.176	0.04181	0.9592	0.694
Sex*SVL*weight	1	0.222	0.00426	0.6847	0.948
Pop*SVL*weight	7	2.434	0.04678	1.0731	0.193
Sex*Pop*SVL*weight	7	2.328	0.04474	1.0264	0.352
Residual	87	28.190	0.54176
Total	150	52.034	1.00000
Kindgom composition
Sex	1	0.00310	0.00256	0.4069	0.495
Pop	7	0.06972	0.05769	1.3084	0.245
SVL	1	0.00010	0.00008	0.0130	0.917
weight	1	0.00257	0.00212	0.3370	0.561	Groups (Sex)	1	0.01077	0.0107738	1.5424	0.2162
Sex*Pop	7	0.01050	0.00868	0.1970	0.973	Residuals	149	1.04075	0.0069849
Sex*SVL	1	0.05224	0.04322	6.8617	0.019
Pop*SVL	7	0.01018	0.00842	0.1910	0.921
Sex*weight	1	0.00312	0.00258	0.4092	0.514	Groups (SVL)	145	9.5727e-33	6.6019e-35	13.712	0.003833
Pop*weight	7	0.03463	0.02865	0.6498	0.520	Residuals	5	2.4100e-35	4.8150e-36
SVL*weight	1	0.05071	0.04196	6.6611	0.022
Sex*Pop*SVL	7	0.07117	0.05888	1.3355	0.298
Sex*Pop*weight	7	0.09313	0.07706	1.7476	0.205	Groups (weight)	138	2.2897e-32	1.6592e-34	66.165	8.773e-10
Sex*SVL*weight	1	0.00312	0.00258	0.4093	0.488	Residuals	12	3.0100e-35	2.5080e-36
Pop*SVL*weight	7	0.08634	0.07144	1.6202	0.231
Sex*Pop*SVL*weight	7	0.05565	0.04605	1.0443	0.367
Residual	87	0.66234	0.54802
Total	150	1.20861	1.00000

## Sheet: TableS5
Table S5. Frequency of occurrence (%) of each prey item among populations and univariate tests from the Generalized Linear Models for Multivariate Abundance Data. A- OTU level B - family level. Significant values are in bold.
A	OTU	Frequency of Ocurrence (%)									Deviance	p-value
		Funchal (n = 20)	Eira do Serrado (n = 20)	Lombo do Moleiro (n = 20)	Paúl da Serra (n = 11)	Ponta de São Lorenço (n = 20)	Porto Moniz (n = 20)	Santana (n = 20)	São Vicente (n = 20)	Total (n = 151)
	Bituminaria_sp_1	0	5	10	9.09	55	35	0	0	14.57	44.3116	0.000999001
	Asteraceae_5	5	10	0	0	55	0	0	5	9.93	41.3246	0.000999001
	Urticaceae_1	50	10	0	0	0	10	0	0	9.27	39.5174	0.000999001
	Arctotis_venusta	10	50	0	0	5	0	0	5	9.27	36.6396	0.000999001
	Oxalis_sp_3	85	50	55	9.09	25	40	25	70	47.02	33.5901	0.002997
	Musa_sp_1	100	85	55	72.73	45	90	50	60	69.54	33.1517	0.002997
	Asteraceae_9	15	0	45	0	10	15	0	0	11.26	31.9225	0.00599401
	Armadillidium_vulgare	75	50	65	63.64	85	10	60	50	56.95	31.3046	0.00699301
	Citrus_sp_1	25	55	15	9.09	10	5	5	0	15.89	29.7345	0.00699301
	Acanthaceae_1	35	0	0	0	5	0	0	0	5.3	28.7352	0.010989
	Talitroides_topitotum	0	10	35	0	0	5	30	5	11.26	27.0511	0.01998
	Asteraceae_8	15	25	15	0	15	65	10	15	21.19	26.952	0.020979
	Pinus_sp_1	5	70	25	9.09	25	20	25	15	25.17	26.8905	0.020979
	Opogona_omoscopa	5	0	15	0	0	5	40	5	9.27	25.5994	0.037962
	Oxalis_sp_2	5	0	20	0	0	10	10	40	11.26	25.3843	0.037962
	Salix_sp_1	0	5	25	9.09	0	15	40	5	12.58	25.3646	0.037962
	Plantago_sp_1	0	0	20	0	0	25	5	20	9.27	22.7838	0.117882
	Deroceras_panormitanum	45	10	35	9.09	0	10	10	20	17.88	22.662	0.117882
	Myrtaceae_1	35	5	5	0	5	0	0	5	7.28	21.1445	0.191808
	Apiaceae_2	25	40	35	0	50	25	5	20	26.49	21.1047	0.191808
	Ipomoea_sp_1	10	10	0	0	35	5	5	0	8.61	20.822	0.211788
	Tropaeolaceae_9	0	5	25	0	5	20	0	0	7.28	20.4141	0.244755
	Actinella_nitidiuscula	0	10	5	0	10	35	0	10	9.27	20.4016	0.244755
	Convolvulaceae_1	0	20	5	0	30	5	5	0	8.61	20.3352	0.244755
	Achyranthes_aspera	5	10	0	0	0	30	0	5	6.62	20.2973	0.244755
	Tetragonia_tetragonoides	5	0	0	0	0	0	0	25	3.97	20.0304	0.25974
	Tradescantia_sp_1	0	0	0	0	0	5	25	0	3.97	20.0304	0.265734
	Achyranthes_sp_1	5	0	0	0	5	30	0	5	5.96	19.957	0.272727
	Solanum_sp_1	10	20	5	27.27	10	20	50	5	17.88	19.2766	0.356643
	Fumaria_sp_1	30	0	5	0	5	15	0	5	7.95	18.6321	0.424575
	Hydrangea_sp_1	0	15	0	36.36	10	5	0	10	7.95	18.5207	0.433566
	Boraginaceae_1	0	25	0	9.09	10	20	0	5	8.61	18.4523	0.447552
	Dennstaedtiaceae_1	0	0	20	18.18	0	0	15	5	6.62	18.3202	0.461538
	Rumex_sp_1	0	20	25	9.09	0	10	10	0	9.27	18.0319	0.502498
	Tropaeolaceae_4	0	5	30	0	5	10	0	5	7.28	17.5451	0.566434
	Picea_sp_1	5	10	15	27.27	5	0	35	10	12.58	16.685	0.705295
	Araliaceae_1	0	5	25	0	0	0	5	5	5.3	16.2585	0.732268
	Rosaceae_1	5	45	40	9.09	15	15	30	20	23.18	16.1552	0.742258
	Asteraceae_4	25	35	40	27.27	70	55	20	45	40.4	16.0217	0.752248
	Quercus_sp_1	5	10	0	27.27	5	10	25	0	9.27	15.9778	0.752248
	Geranium_sp_1	5	0	20	0	0	0	0	0	3.31	15.9541	0.752248
	Arachnida_2	0	20	0	0	0	5	0	0	3.31	15.9541	0.752248
	Hyperomyzus_lactucae	0	0	0	0	20	5	0	0	3.31	15.9541	0.759241
	Amaranthaceae_1	5	0	0	0	0	20	0	0	3.31	15.9541	0.763237
	Isopoda_4	10	20	15	0	0	0	10	0	7.28	15.8737	0.774226
	Brassicaceae_1	10	5	0	9.09	5	30	5	0	7.95	15.8352	0.775225
	Oniscus_asellus	0	10	25	9.09	0	5	10	0	7.28	15.6622	0.816184
	Tamarix_sp_1	5	15	0	0	5	5	0	25	7.28	15.5812	0.818182
	Solanum_sp_2	15	15	0	9.09	10	20	40	10	15.23	15.4041	0.834166
	Brassica_sp_1	30	15	10	9.09	0	10	0	10	10.6	15.0165	0.85015
	Avena_sp_1	5	5	20	0	5	0	0	20	7.28	14.9508	0.85015
	Deroceras_invadens	0	0	20	0	5	5	20	10	7.95	14.8802	0.871129
	Poaceae_1	45	15	50	36.36	15	45	40	55	37.75	14.7109	0.872128
	Euphorbia_sp_1	20	0	0	0	0	10	10	10	6.62	14.5903	0.872128
	Anagalis_sp_1	0	0	5	0	0	5	0	20	3.97	14.5671	0.872128
	Mercurialis_annua	0	5	5	0	25	5	0	10	6.62	14.2979	0.884116
	Parietaria_sp_1	5	10	5	0	5	0	0	25	6.62	14.2979	0.884116
	Beta_sp_1	10	0	0	0	0	15	0	0	3.31	13.9991	0.923077
	Fagaceae_1	0	10	0	0	0	15	0	0	3.31	13.9991	0.923077
	Technomyrmex_pallipes	20	0	10	9.09	10	25	10	0	10.6	13.8499	0.931069
	Fabaceae_4	0	5	5	0	0	0	20	10	5.3	13.6731	0.946054
	Ficus_sp_1	0	0	5	0	5	20	0	10	5.3	13.6731	0.946054
	Poaceae_3	35	50	55	90.91	40	60	60	40	51.66	13.6317	0.946054
	Isopoda_1	0	0	0	18.18	0	0	10	0	2.65	13.5064	0.947053
	Ischyropsalididae_3	0	0	0	9.09	0	0	15	0	2.65	13.3304	0.961039
	Asteraceae_6	15	40	45	9.09	15	10	30	25	24.5	13.2613	0.964036
	Helix_aspersa	0	0	20	0	5	15	10	5	7.28	12.9958	0.968032
	Lamiaceae_1	0	5	10	0	0	15	20	5	7.28	12.9958	0.968032
	Bougainvillea_sp_1	15	5	0	0	5	0	0	15	5.3	12.8758	0.968032
	Lotus_sp_1	0	5	5	9.09	25	5	10	0	7.28	12.7843	0.968032
	Tropaeolaceae_6	0	0	15	0	0	0	0	0	1.99	12.5434	0.979021
	Tropaeolaceae_7	0	0	15	0	0	0	0	0	1.99	12.5434	0.979021
	Iridaceae_1	15	0	0	0	0	0	0	0	1.99	12.5434	0.984016
	Passiflora_sp_1	15	0	0	0	0	0	0	0	1.99	12.5434	0.984016
	Allium_sp_2	0	0	0	0	0	15	0	0	1.99	12.5434	0.984016
	Cardiospermum_grandiflorum	15	0	0	0	0	0	0	0	1.99	12.5434	0.984016
	Isopoda_8	0	0	0	0	0	0	15	0	1.99	12.5434	0.984016
	Punctoribates_punctum	0	0	0	0	0	0	15	0	1.99	12.5434	0.984016
	Euphorbiaceae_1	10	5	0	18.18	10	15	0	0	6.62	12.3297	0.989011
	Allium_sp_1	5	0	15	9.09	0	10	0	0	4.64	12.1151	0.99001
	Oryza_sp_1	0	0	5	0	0	15	0	0	2.65	12.0918	0.994006
	Lithobius_lusitanus	0	15	0	0	0	0	0	5	2.65	12.0918	0.996004
	Tropaeolaceae_11	0	5	15	0	0	0	0	0	2.65	12.0918	0.996004
	Rosaceae_2	0	15	0	18.18	0	10	5	5	5.96	11.9895	0.996004
	Juglandaceae_1	0	10	5	18.18	0	0	0	5	3.97	11.1488	0.999001
	Silene_sp_1	0	0	0	0	0	15	5	5	3.31	11.1212	0.999001
	Chelidonium_majus	0	5	15	0	0	0	0	5	3.31	11.1212	0.999001
	Anacardiaceae_1	5	0	15	0	5	0	0	0	3.31	11.1212	0.999001
	Rubiaceae_1	5	0	0	0	0	0	5	15	3.31	11.1212	0.999001
	Caryophyllaceae_1	5	5	0	9.09	0	0	15	0	3.97	10.9729	0.999001
	Arachnida_4	10	0	0	0	0	0	10	0	2.65	10.9341	1
	Pyrus_sp_1	10	0	0	0	0	10	0	0	2.65	10.9341	1
	Milax_gagates	0	5	15	0	0	10	0	5	4.64	10.8765	1
	Malvaceae_2	0	5	0	0	5	20	5	5	5.3	10.7952	1
	Eriosoma_patchiae	0	0	5	0	0	10	10	0	3.31	9.96357	1
	Populus_sp_1	5	10	10	0	0	0	0	0	3.31	9.96357	1
	Abelia_sp_1	0	10	0	9.09	10	15	15	15	9.27	9.81633	1
	Amaryllidaceae_1	0	0	10	9.09	0	0	0	0	1.99	9.74645	1
	Oinophila_v_flava	0	0	0	9.09	0	0	0	10	1.99	9.74645	1
	Trifolium_sp_1	0	0	5	18.18	5	10	15	10	7.28	9.57757	1
	Pisum_sp_1	10	15	5	0	10	5	0	0	5.96	9.41726	1
	Lauraceae_1	0	15	10	0	5	10	0	5	5.96	9.41726	1
	Ischyropsalididae_2	0	0	10	9.09	0	0	5	0	2.65	9.29485	1
	Euphorbiaceae_2	0	0	0	9.09	0	10	5	0	2.65	9.29485	1
	Ommatoiulus_moreleti	20	25	20	9.09	5	30	15	5	16.56	9.07993	1
	Cerastium_sp_1	25	20	15	18.18	0	15	10	10	13.91	9.02564	1
	Asteraceae_3	0	5	5	18.18	5	5	20	5	7.28	8.65469	1
	Holcus_sp_1	0	5	10	0	0	0	5	10	3.97	8.57661	1
	Cupressaceae_1	10	5	0	0	5	10	0	0	3.97	8.57661	1
	Bromus_sp_2	0	10	5	0	0	0	0	0	1.99	8.50785	1
	Ranunculus_sp_1	0	0	0	0	0	5	10	0	1.99	8.50785	1
	Porrhoclubiona_sp_1	0	5	0	0	0	0	10	0	1.99	8.50785	1
	Veronica_sp_2	0	0	10	0	5	0	0	0	1.99	8.50785	1
	Mentha_sp_1	0	0	10	0	0	5	0	0	1.99	8.50785	1
	Luffia_sp_1	0	0	0	0	0	5	0	10	1.99	8.50785	1
	Malvaceae_1	0	5	0	9.09	0	5	0	10	3.31	8.32431	1
	Oleaceae_1	0	5	5	9.09	0	0	0	10	3.31	8.32431	1
	Asteraceae_1	0	0	0	0	0	10	0	0	1.32	8.26634	1
	Aeonium_sp_1	0	0	0	0	0	0	0	10	1.32	8.26634	1
	Anisolabididae_1	0	0	0	0	0	0	0	10	1.32	8.26634	1
	Bromus_sp_1	10	0	0	0	0	0	0	0	1.32	8.26634	1
	Porcellio_dilatatus	0	0	0	0	0	0	0	10	1.32	8.26634	1
	Arachnida_1	0	0	0	0	10	0	0	0	1.32	8.26634	1
	Araneae_1	0	10	0	0	0	0	0	0	1.32	8.26634	1
	Buxus_sp_1	0	10	0	0	0	0	0	0	1.32	8.26634	1
	Lehmannia_nyctelia	0	10	0	0	0	0	0	0	1.32	8.26634	1
	Proteroiulus_fuscus	0	10	0	0	0	0	0	0	1.32	8.26634	1
	Arachnida_3	0	0	0	0	0	0	10	0	1.32	8.26634	1
	Bignoniaceae_1	10	0	0	0	0	0	0	0	1.32	8.26634	1
	Ischyropsalididae_1	0	0	0	0	0	0	10	0	1.32	8.26634	1
	Isopoda_7	0	0	0	0	0	0	10	0	1.32	8.26634	1
	Agabiformius_lentus	10	0	0	0	0	0	0	0	1.32	8.26634	1
	Phyllanthaceae_1	10	0	0	0	0	0	0	0	1.32	8.26634	1
	Tropaeolaceae_10	0	0	10	0	0	0	0	0	1.32	8.26634	1
	Tropaeolaceae_3	0	0	10	0	0	0	0	0	1.32	8.26634	1
	Cydnidae_1	0	0	0	0	0	0	0	10	1.32	8.26634	1
	Porcellionides_pruinosus	0	10	5	0	0	0	5	0	2.65	8.05625	1
	Solanaceae_2	0	10	0	0	5	0	0	5	2.65	8.05625	1
	Capsicum_sp_1	5	0	0	0	0	10	0	5	2.65	8.05625	1
	Galium_sp_2	0	0	5	0	0	5	10	0	2.65	8.05625	1
	Tropaeolaceae_2	5	0	10	0	5	0	0	0	2.65	8.05625	1
	Vitaceae_1	0	5	0	0	0	5	10	0	2.65	8.05625	1
	Hordeum_sp_1	10	0	0	0	5	0	0	5	2.65	8.05625	1
	Ero_sp_1	5	10	10	18.18	5	0	5	0	5.96	7.95397	1
	Porcellionides_sexfasciatus	35	15	20	18.18	15	20	10	5	17.22	7.59728	1
	Eluma_caelatum	5	30	15	27.27	15	25	10	15	17.22	7.2311	1
	Actinidia_sp_1	5	5	0	0	0	10	0	5	3.31	7.08571	1
	Brachypodium_sp_1	0	5	5	0	10	5	0	0	3.31	7.08571	1
	Anacardium_sp_1	0	5	5	9.09	5	0	10	0	3.97	6.93735	1
	Morus_sp_1	5	5	0	9.09	0	0	0	0	1.99	6.86859	1
	Tarentola_mauritanica	0	5	0	9.09	0	0	5	0	1.99	6.86859	1
	Betulaceae_1	0	0	0	9.09	0	0	5	5	1.99	6.86859	1
	Sphaerophoria_sp_1	0	0	0	9.09	5	0	0	0	1.32	6.62708	1
	Sarcoptiformes_1	0	0	0	9.09	5	0	0	0	1.32	6.62708	1
	Bertholletia_sp_1	0	0	5	9.09	0	0	0	0	1.32	6.62708	1
	Globularia_sp_1	0	0	5	9.09	0	0	0	0	1.32	6.62708	1
	Chrysanthemum_sp_1	0	0	5	9.09	0	0	0	0	1.32	6.62708	1
	Acer_sp_1	0	0	5	9.09	5	0	0	5	2.65	6.41699	1
	Apiaceae_1	5	0	5	0	10	5	0	5	3.97	5.69875	1
	Isopoda_6	0	10	5	0	5	0	5	5	3.97	5.69875	1
	Choneiulus_palmatus	0	5	5	0	0	0	5	0	1.99	5.62999	1
	Poa_sp_1	0	0	5	0	0	5	0	5	1.99	5.62999	1
	Cyatheaceae_1	0	0	0	0	5	0	5	5	1.99	5.62999	1
	Arthropoda_1	0	0	0	0	5	0	5	5	1.99	5.62999	1
	Longicaudinus_corydalisicola	5	0	0	0	5	5	0	0	1.99	5.62999	1
	Zelotes_tenuis	5	5	0	0	0	5	0	0	1.99	5.62999	1
	Prunus_sp_1	0	5	0	9.09	5	5	0	5	3.31	5.44644	1
	Cicer_sp_1	0	5	5	9.09	5	5	0	0	3.31	5.44644	1
	Pittosporaceae_1	0	0	0	0	5	0	5	0	1.32	5.38848	1
	Meliaceae_2	0	0	0	0	0	5	5	0	1.32	5.38848	1
	Paratrechina_longicornis	0	0	0	0	0	5	5	0	1.32	5.38848	1
	Sarcoptiformes_2	0	0	0	0	0	5	0	5	1.32	5.38848	1
	Leiobunum_blackwalli	0	0	5	0	0	0	5	0	1.32	5.38848	1
	Gossypium_sp_1	0	0	0	0	0	5	5	0	1.32	5.38848	1
	Medicago_sp_1	0	0	5	0	5	0	0	0	1.32	5.38848	1
	Annonaceae_1	5	0	0	0	0	0	5	0	1.32	5.38848	1
	Taraxacum_sp_1	0	0	0	0	5	0	5	0	1.32	5.38848	1
	Polydesmus_coriaceus	0	5	0	0	0	0	5	0	1.32	5.38848	1
	Salticus_sp_1	5	5	0	0	0	0	0	0	1.32	5.38848	1
	Ischyropsalis_sp_2	0	0	5	0	0	0	5	0	1.32	5.38848	1
	Chenopodium_sp_1	0	0	0	0	5	5	0	0	1.32	5.38848	1
	Hemigymnochaeta_unicolor	0	5	0	0	0	0	5	0	1.32	5.38848	1
	Pedaliaceae_1	0	0	5	0	5	0	0	0	1.32	5.38848	1
	Solanaceae_4	0	5	0	0	0	0	5	0	1.32	5.38848	1
	Apocynaceae_1	5	0	0	0	0	0	0	5	1.32	5.38848	1
	Dolichosciara_flavipes	0	0	0	0	0	0	5	5	1.32	5.38848	1
	Entomobryomorpha_1	0	5	0	0	0	0	0	5	1.32	5.38848	1
	Isopoda_5	0	0	5	0	5	0	0	0	1.32	5.38848	1
	no_match	0	0	0	0	5	0	0	5	1.32	5.38848	1
	Bradysia_trivittata	5	0	5	0	0	0	0	0	1.32	5.38848	1
	Stratiomyidae_1	0	0	5	0	0	0	5	0	1.32	5.38848	1
	Xystrologa_sp_1	0	0	0	0	5	5	0	0	1.32	5.38848	1
	Geophilomorpha_1	5	5	0	0	0	0	0	0	1.32	5.38848	1
	Arachis_sp_1	5	10	5	9.09	5	5	0	0	4.64	5.20171	1
	Myricaceae_1	5	0	5	0	0	0	5	5	2.65	5.17839	1
	Nothoscordum_gracile	5	0	5	0	0	5	0	5	2.65	5.17839	1
	Salticidae_1	0	5	0	0	0	5	5	5	2.65	5.17839	1
	Fabaceae_3	10	10	10	9.09	0	15	10	5	8.61	5.04353	1
	Malvapion_malvae	0	0	0	0	0	5	0	0	0.66	4.08705	1
	Mentha_sp_2	0	0	0	0	0	5	0	0	0.66	4.08705	1
	Oligotoma_nigra	0	0	0	0	0	5	0	0	0.66	4.08705	1
	Phyteuma_sp_1	5	0	0	0	0	0	0	0	0.66	4.08705	1
	Proteaceae_1	0	0	0	0	0	0	0	5	0.66	4.08705	1
	Symphypleona_1	0	0	0	0	0	0	0	5	0.66	4.08705	1
	Anderemaeidae_1	0	0	0	0	0	0	0	5	0.66	4.08705	1
	Betula_sp_1	0	0	0	0	0	0	0	5	0.66	4.08705	1
	Diptera_2	0	0	0	0	0	0	0	5	0.66	4.08705	1
	Galium_sp_1	0	0	0	0	0	5	0	0	0.66	4.08705	1
	Humerobatidae_1	0	0	0	0	0	5	0	0	0.66	4.08705	1
	Idaea_atlantica	0	0	0	0	0	5	0	0	0.66	4.08705	1
	Oxalis_sp_4	5	0	0	0	0	0	0	0	0.66	4.08705	1
	Platanaceae_1	0	0	0	0	0	5	0	0	0.66	4.08705	1
	Rumina_decollata	0	0	0	0	0	5	0	0	0.66	4.08705	1
	Tetramorium_caldarium	0	0	0	0	0	0	0	5	0.66	4.08705	1
	Zingiberaceae_1	0	0	0	0	0	0	0	5	0.66	4.08705	1
	Crassulaceae_2	0	0	5	0	0	0	0	0	0.66	4.08705	1
	Davallia_canariensis	0	0	5	0	0	0	0	0	0.66	4.08705	1
	Isopoda_9	0	0	0	0	0	5	0	0	0.66	4.08705	1
	Poaceae_2	0	0	5	0	0	0	0	0	0.66	4.08705	1
	Begonia_sp_1	5	0	0	0	0	0	0	0	0.66	4.08705	1
	Rhamnus_sp_1	0	0	5	0	0	0	0	0	0.66	4.08705	1
	Tropaeolaceae_8	0	5	0	0	0	0	0	0	0.66	4.08705	1
	Asteraceae_2	0	0	5	0	0	0	0	0	0.66	4.08705	1
	Euphorbiaceae_3	0	5	0	0	0	0	0	0	0.66	4.08705	1
	Ochnaceae_1	5	0	0	0	0	0	0	0	0.66	4.08705	1
	Opogona_sacari	5	0	0	0	0	0	0	0	0.66	4.08705	1
	Coleoptera_1	0	0	0	0	5	0	0	0	0.66	4.08705	1
	Ectopsocidae_1	5	0	0	0	0	0	0	0	0.66	4.08705	1
	Fabaceae_1	5	0	0	0	0	0	0	0	0.66	4.08705	1
	Prosopis_sp_1	0	0	0	0	5	0	0	0	0.66	4.08705	1
	Saccharum_sp_1	5	0	0	0	0	0	0	0	0.66	4.08705	1
	Theobroma_sp_1	0	5	0	0	0	0	0	0	0.66	4.08705	1
	Asteraceae_7	0	5	0	0	0	0	0	0	0.66	4.08705	1
	Cicadellidae_1	0	0	0	0	5	0	0	0	0.66	4.08705	1
	Holocnemus_pluchei	0	5	0	0	0	0	0	0	0.66	4.08705	1
	Magnoliopsida_1	0	0	0	0	5	0	0	0	0.66	4.08705	1
	Meliaceae_1	0	0	0	0	5	0	0	0	0.66	4.08705	1
	Monomorium_subopacum	0	0	0	0	5	0	0	0	0.66	4.08705	1
	Papaveraceae_1	0	0	0	0	5	0	0	0	0.66	4.08705	1
	Ulmaceae_1	0	5	0	0	0	0	0	0	0.66	4.08705	1
	Mercurialis_sp_3	0	0	0	0	5	0	0	0	0.66	4.08705	1
	Scaeva_pyrastri	0	0	0	0	5	0	0	0	0.66	4.08705	1
	Veronica_sp_1	5	0	0	0	0	0	0	0	0.66	4.08705	1
	Crassulaceae_1	0	0	0	0	0	0	0	5	0.66	4.08705	1
	Polypodiaceae_1	0	0	0	0	0	0	0	5	0.66	4.08705	1
	Sisyrinchium_sp_1	0	0	0	0	0	0	0	5	0.66	4.08705	1
	Aclastus_micator	0	0	0	0	0	0	5	0	0.66	4.08705	1
	Allacma_fusca	0	0	0	0	0	0	5	0	0.66	4.08705	1
	Cardamine_hirsuta	0	0	0	0	0	0	5	0	0.66	4.08705	1
	Chamaecrista_sp_1	0	0	0	0	0	0	5	0	0.66	4.08705	1
	Coleoptera_2	0	0	0	0	0	0	5	0	0.66	4.08705	1
	Cryptamorpha_desjardinsii	0	0	0	0	0	0	5	0	0.66	4.08705	1
	Diptera_1	0	0	0	0	0	0	5	0	0.66	4.08705	1
	Hemiptera_1	0	0	0	0	0	0	5	0	0.66	4.08705	1
	Leia_winthemi	0	0	0	0	0	0	5	0	0.66	4.08705	1
	Limoniidae_1	0	0	0	0	0	0	5	0	0.66	4.08705	1
	Ulmaceae_2	0	0	0	0	0	0	5	0	0.66	4.08705	1
	Ischyropsalis_sp_1	0	0	0	0	0	0	5	0	0.66	4.08705	1
	Isopoda_2	0	0	5	0	0	0	0	0	0.66	4.08705	1
	Isopoda_3	0	0	5	0	0	0	0	0	0.66	4.08705	1
	Lepidoptera_1	0	0	5	0	0	0	0	0	0.66	4.08705	1
	Naupactus_cervinus	0	0	5	0	0	0	0	0	0.66	4.08705	1
	Rhopalosiphoninus_latysiphon	0	0	5	0	0	0	0	0	0.66	4.08705	1
	Simaroubaceae_1	0	0	5	0	0	0	0	0	0.66	4.08705	1
	Asparagaceae_1	0	0	0	0	0	0	0	5	0.66	4.08705	1
	Aizoaceae_1	0	0	0	0	0	0	0	5	0.66	4.08705	1
	Araliaceae_2	0	0	0	0	0	0	0	5	0.66	4.08705	1
	Chironomidae_1	0	0	0	0	0	0	0	5	0.66	4.08705	1
	Cosmopterix_pulchrimella	0	0	0	0	0	0	0	5	0.66	4.08705	1
	Phytolaccaceae_1	0	0	0	0	0	0	0	5	0.66	4.08705	1
	Tydeidae_1	0	0	0	0	0	0	0	5	0.66	4.08705	1
	Periplaneta_americana	5	5	5	9.09	0	5	5	0	3.97	4.05949	1
	Crassula_sp_1	0	0	0	9.09	0	0	0	0	0.66	0	1
	Decticus_albifrons	0	0	0	0	20	0	0	0	2.65	0	1
	Ericaceae_1	0	5	0	36.36	0	0	0	0	3.31	0	1
	Ero_tuberculata	0	0	0	9.09	0	0	0	0	0.66	0	1
	Eupodidae_1	0	0	0	9.09	0	0	0	0	0.66	0	1
	Fabaceae_2	0	5	0	54.55	0	0	5	0	5.3	0	1
	Harpalus_attenuatus	0	0	0	27.27	0	0	0	0	1.99	0	1
	Helianthemum_sp_1	0	0	0	9.09	0	0	0	0	0.66	0	1
	Hypericum_sp_1	0	0	0	9.09	0	0	0	0	0.66	0	1
	Lythraceae_1	0	0	0	9.09	0	0	0	0	0.66	0	1
	Mercurialis_sp_1	0	0	0	0	40	0	0	0	5.3	0	1
	Metrosideros_sp_1	0	0	0	0	0	0	0	20	2.65	0	1
	Moringaceae_1	0	0	0	18.18	0	0	0	0	1.32	0	1
	Oxychilus_alliarius	0	0	0	9.09	0	0	0	0	0.66	0	1
	Saxifragaceae_1	0	20	0	0	0	0	0	0	2.65	0	1
	Silene_sp_2	0	0	0	0	20	0	0	0	2.65	0	1
	Ulex_sp_1	0	0	0	18.18	0	0	0	0	1.32	0	1
B	Family	Frequency of Ocurrence (%)									Deviance	p-value
		Funchal (n = 20)	Eira do Serrado (n = 20)	Lombo do Moleiro (n = 20)	Paúl da Serra (n = 11)	Ponta de São Lorenço (n = 20)	Porto Moniz (n = 20)	Santana (n = 20)	São Vicente (n = 20)	Total (n = 151)
	Musaceae	100	85	55	72.73	45	90	50	60	69.54	33.1517	0.001998
	Oxalidaceae	85	50	55	9.09	25	45	30	70	48.34	31.415	0.003996
	Urticaceae	50	20	5	0	5	10	0	25	15.23	29.746	0.00999001
	Rutaceae	25	55	15	9.09	10	5	5	0	15.89	29.7345	0.00999001
	Acanthaceae	35	0	0	0	5	0	0	0	5.3	28.7352	0.00999001
	Talitridae	0	10	35	0	0	5	30	5	11.26	27.0511	0.021978
	Myrtaceae	35	5	5	0	5	0	0	25	9.93	25.5217	0.033966
	Pinaceae	10	70	35	27.27	25	20	55	20	33.11	25.484	0.033966
	Aizoaceae	5	0	0	0	0	0	0	30	4.64	24.2941	0.0599401
	Salicaceae	5	15	35	9.09	0	15	40	5	15.89	23.0301	0.0969031
	Solanaceae	20	35	5	27.27	20	40	65	20	29.14	22.6284	0.103896
	Amaryllidaceae	10	0	30	18.18	0	20	0	5	9.93	21.9091	0.127872
	Apiaceae	30	40	35	0	50	25	5	20	27.15	21.171	0.158841
	Asteraceae	55	80	85	36.36	90	75	45	65	68.21	21.0383	0.161838
	Fagaceae	5	20	0	27.27	5	25	25	0	12.58	20.495	0.18981
	Geomitridae	0	10	5	0	10	35	0	10	9.27	20.4016	0.193806
	Commelinaceae	0	0	0	0	0	5	25	0	3.97	20.0304	0.21978
	Tropaeolaceae	5	15	30	0	10	30	0	5	12.58	19.608	0.268731
	Convolvulaceae	10	25	5	0	35	10	10	0	12.58	18.9282	0.313686
	Hydrangeaceae	0	15	0	36.36	10	5	0	10	7.95	18.5207	0.351648
	Boraginaceae	0	25	0	9.09	10	20	0	5	8.61	18.4523	0.360639
	Dennstaedtiaceae	0	0	20	18.18	0	0	15	5	6.62	18.3202	0.364635
	Polygonaceae	0	20	25	9.09	0	10	10	0	9.27	18.0319	0.38961
	Amaranthaceae	5	10	0	0	5	30	0	5	7.28	17.5451	0.436563
	Lamiaceae	0	5	20	0	0	20	20	5	9.27	17.3205	0.452547
	Ischyropsalididae	0	0	10	9.09	0	0	20	0	4.64	16.9479	0.493506
	Aphididae	5	0	5	0	25	10	0	0	5.96	16.8355	0.505495
	Araliaceae	0	5	25	0	0	0	5	10	5.96	16.8355	0.505495
	Plantaginaceae	5	0	30	9.09	5	25	5	20	12.58	16.8022	0.506494
	Tineidae	10	0	15	9.09	5	10	40	15	13.25	16.701	0.506494
	Agriolimacidae	45	10	35	9.09	5	15	20	30	21.85	16.1391	0.578422
	Papaveraceae	30	5	20	0	5	15	0	10	11.26	16.0246	0.578422
	Geraniaceae	5	0	20	0	0	0	0	0	3.31	15.9541	0.578422
	Chenopodiaceae	10	0	0	0	5	20	0	0	4.64	15.7093	0.62038
	Oniscidae	0	10	25	9.09	0	5	10	0	7.28	15.6622	0.62038
	Tamaricaceae	5	15	0	0	5	5	0	25	7.28	15.5812	0.62038
	Primulaceae	0	0	5	0	0	5	0	20	3.97	14.5671	0.756244
	Armadillidiidae	75	70	70	72.73	85	35	60	55	64.9	14.2082	0.796204
	Malvaceae	0	15	0	9.09	5	25	10	10	9.27	13.199	0.916084
	Fabaceae	30	50	35	63.64	70	60	45	30	47.02	12.9996	0.916084
	Helicidae	0	0	20	0	5	15	10	5	7.28	12.9958	0.916084
	Nyctaginaceae	15	5	0	0	5	0	0	15	5.3	12.8758	0.916084
	Poaceae	60	65	80	90.91	45	70	70	85	69.54	12.8123	0.916084
	Passifloraceae	15	0	0	0	0	0	0	0	1.99	12.5434	0.927073
	Punctoribatidae	0	0	0	0	0	0	15	0	1.99	12.5434	0.928072
	Crassulaceae	0	0	5	9.09	0	0	0	15	3.31	12.3598	0.946054
	Formicidae	20	0	10	9.09	15	30	15	5	13.25	12.1742	0.956044
	Iridaceae	15	0	0	0	0	0	0	5	2.65	12.0918	0.966034
	Lithobiidae	0	15	0	0	0	0	0	5	2.65	12.0918	0.966034
	Juglandaceae	0	10	5	18.18	0	0	0	5	3.97	11.1488	0.99001
	Rosaceae	15	55	40	36.36	20	30	35	20	31.13	11.1317	0.99001
	Blaniulidae	0	15	5	0	0	0	5	0	3.31	11.1212	0.99001
	Brassicaceae	30	20	10	18.18	5	35	10	10	17.22	10.9889	0.99001
	Milacidae	0	5	15	0	0	10	0	5	4.64	10.8765	0.99001
	Rubiaceae	5	0	5	0	0	5	15	15	5.96	10.5749	0.994006
	Euphorbiaceae	25	15	5	27.27	40	30	15	15	21.19	10.5749	0.994006
	Anacardiaceae	5	5	20	9.09	10	0	10	0	7.28	10.1989	0.994006
	Pemphigidae	0	0	5	0	0	10	10	0	3.31	9.96357	0.994006
	Caprifoliaceae	0	10	0	9.09	10	15	15	15	9.27	9.81633	0.995005
	Syrphidae	0	0	0	9.09	10	0	0	0	1.99	9.74645	0.995005
	Lauraceae	0	15	10	0	5	10	0	5	5.96	9.41726	0.998002
	Betulaceae	0	0	0	9.09	0	0	5	10	2.65	9.29485	0.998002
	Sapindaceae	15	0	5	9.09	5	0	0	5	4.64	9.23723	0.998002
	Julidae	20	25	20	9.09	5	30	15	5	16.56	9.07993	0.998002
	Cupressaceae	10	5	0	0	5	10	0	0	3.97	8.57661	0.998002
	Ranunculaceae	0	0	0	0	0	5	10	0	1.99	8.50785	0.998002
	Clubionidae	0	5	0	0	0	0	10	0	1.99	8.50785	0.998002
	Psychidae	0	0	0	0	0	5	0	10	1.99	8.50785	0.999001
	Oleaceae	0	5	5	9.09	0	0	0	10	3.31	8.32431	0.999001
	Anisolabididae	0	0	0	0	0	0	0	10	1.32	8.26634	0.999001
	Buxaceae	0	10	0	0	0	0	0	0	1.32	8.26634	1
	Limacidae	0	10	0	0	0	0	0	0	1.32	8.26634	1
	Bignoniaceae	10	0	0	0	0	0	0	0	1.32	8.26634	1
	Phyllanthaceae	10	0	0	0	0	0	0	0	1.32	8.26634	1
	Cydnidae	0	0	0	0	0	0	0	10	1.32	8.26634	1
	Vitaceae	0	5	0	0	0	5	10	0	2.65	8.05625	1
	Mimetidae	5	10	10	18.18	5	0	5	0	5.96	7.95397	1
	Moraceae	5	5	5	9.09	5	20	0	10	7.28	7.32105	1
	Actinidiaceae	5	5	0	0	0	10	0	5	3.31	7.08571	1
	Phyllodactylidae	0	5	0	9.09	0	0	5	0	1.99	6.86859	1
	Lecythidaceae	0	0	5	9.09	0	0	0	0	1.32	6.62708	1
	Porcellionidae	40	15	25	18.18	15	20	15	15	20.53	5.8188	1
	Salticidae	5	10	0	0	0	5	5	5	3.97	5.69875	1
	Meliaceae	0	0	0	0	5	5	5	0	1.99	5.62999	1
	Cyatheaceae	0	0	0	0	5	0	5	5	1.99	5.62999	1
	Gnaphosidae	5	5	0	0	0	5	0	0	1.99	5.62999	1
	Pittosporaceae	0	0	0	0	5	0	5	0	1.32	5.38848	1
	Sclerosomatidae	0	0	5	0	0	0	5	0	1.32	5.38848	1
	Annonaceae	5	0	0	0	0	0	5	0	1.32	5.38848	1
	Polydesmidae	0	5	0	0	0	0	5	0	1.32	5.38848	1
	Ulmaceae	0	5	0	0	0	0	5	0	1.32	5.38848	1
	Ischyropsalidae	0	0	5	0	0	0	5	0	1.32	5.38848	1
	Calliphoridae	0	5	0	0	0	0	5	0	1.32	5.38848	1
	Pedaliaceae	0	0	5	0	5	0	0	0	1.32	5.38848	1
	Apocynaceae	5	0	0	0	0	0	0	5	1.32	5.38848	1
	Stratiomyidae	0	0	5	0	0	0	5	0	1.32	5.38848	1
	Sciaridae	5	0	5	0	0	0	5	5	2.65	5.17839	1
	Myricaceae	5	0	5	0	0	0	5	5	2.65	5.17839	1
	Brentidae	0	0	0	0	0	5	0	0	0.66	4.08705	1
	Oligotomidae	0	0	0	0	0	5	0	0	0.66	4.08705	1
	Campanulaceae	5	0	0	0	0	0	0	0	0.66	4.08705	1
	Proteaceae	0	0	0	0	0	0	0	5	0.66	4.08705	1
	Anderemaeidae	0	0	0	0	0	0	0	5	0.66	4.08705	1
	Geometridae	0	0	0	0	0	5	0	0	0.66	4.08705	1
	Humerobatidae	0	0	0	0	0	5	0	0	0.66	4.08705	1
	Platanaceae	0	0	0	0	0	5	0	0	0.66	4.08705	1
	Subulinidae	0	0	0	0	0	5	0	0	0.66	4.08705	1
	Zingiberaceae	0	0	0	0	0	0	0	5	0.66	4.08705	1
	Davalliaceae	0	0	5	0	0	0	0	0	0.66	4.08705	1
	Begoniaceae	5	0	0	0	0	0	0	0	0.66	4.08705	1
	Rhamnaceae	0	0	5	0	0	0	0	0	0.66	4.08705	1
	Ochnaceae	5	0	0	0	0	0	0	0	0.66	4.08705	1
	Ectopsocidae	5	0	0	0	0	0	0	0	0.66	4.08705	1
	Cicadellidae	0	0	0	0	5	0	0	0	0.66	4.08705	1
	Pholcidae	0	5	0	0	0	0	0	0	0.66	4.08705	1
	Polypodiaceae	0	0	0	0	0	0	0	5	0.66	4.08705	1
	Ichneumonidae	0	0	0	0	0	0	5	0	0.66	4.08705	1
	Limoniidae	0	0	0	0	0	0	5	0	0.66	4.08705	1
	Mycetophilidae	0	0	0	0	0	0	5	0	0.66	4.08705	1
	Silvanidae	0	0	0	0	0	0	5	0	0.66	4.08705	1
	Sminthuridae	0	0	0	0	0	0	5	0	0.66	4.08705	1
	Curculionidae	0	0	5	0	0	0	0	0	0.66	4.08705	1
	Simaroubaceae	0	0	5	0	0	0	0	0	0.66	4.08705	1
	Asparagaceae	0	0	0	0	0	0	0	5	0.66	4.08705	1
	Chironomidae	0	0	0	0	0	0	0	5	0.66	4.08705	1
	Cosmopterigidae	0	0	0	0	0	0	0	5	0.66	4.08705	1
	Phytolaccaceae	0	0	0	0	0	0	0	5	0.66	4.08705	1
	Tydeidae	0	0	0	0	0	0	0	5	0.66	4.08705	1
	Blattidae	5	5	5	9.09	0	5	5	0	3.97	4.05949	1
	Caryophyllaceae	30	25	15	27.27	20	25	25	15	22.52	2.43872	1
	Carabidae	0	0	0	27.27	0	0	0	0	1.99	0	1
	Cistaceae	0	0	0	9.09	0	0	0	0	0.66	0	1
	Ericaceae	0	5	0	36.36	0	0	0	0	3.31	0	1
	Eupodidae	0	0	0	9.09	0	0	0	0	0.66	0	1
	Hypericaceae	0	0	0	9.09	0	0	0	0	0.66	0	1
	Lythraceae	0	0	0	9.09	0	0	0	0	0.66	0	1
	Moringaceae	0	0	0	18.18	0	0	0	0	1.32	0	1
	Oxychilidae	0	0	0	9.09	0	0	0	0	0.66	0	1
	Saxifragaceae	0	20	0	0	0	0	0	0	2.65	0	1
	Tettigoniidae	0	0	0	0	20	0	0	0	2.65	0	1

## Sheet: TableS6
Table S6. Percentage of animal and plant items, between sexes and among populations in the overall diet of T. dugesii. See Figure S3 for graphical representation.
Kindom	Sex		Population								Grand Total
	Female (n=70)	Male (n=81)	Porto Moniz (n = 20)	Paúl da Serra (n = 11)	São Vicente (n = 20)	Lombo do Moleiro (n = 20)	Eira do Serrado (n = 20)	Funchal (n = 20)	Santana (n = 20)	Ponta de São Lorenço (n = 20)
Animalia	28.17%	24.58%	22.91%	27.50%	21.97%	26.61%	21.75%	25.55%	37.88%	26.25%	26.25%
Plantae	71.83%	75.42%	77.09%	72.50%	78.03%	73.39%	78.25%	74.45%	62.12%	73.48%	73.75%
Grand Total	1	1	1	1	1	1	1	1	1	1	1
